# Supplementary material
Source: bioRxiv or medRxiv preprint supplement (http://medrxiv.org/highwire/filestream/91726/field_highwire_adjunct_files/0/2020.07.30.20165050-1.pdf)
Supplement: Supplementary file [file 2020.07.30.20165050-1.pdf]

# Supplement

Index

- 1. Flow chart of study selection based on the rapid review. .... 1
- Figure 1.** Flow chart of study selection based on the rapid review. .... 2
- 2. Published Systematic Reviews as obtained from PubMed search..... 3
- Table 1.** Published Systematic Reviews as obtained from PubMed search..... 3
- 3. Characteristics of the 75 included studies ..... 9
- Table 2.** Characteristics of the 75 included studies ..... 9
- 4. Results of the risk of bias assessment..... 15
- Table 3.** Results of the risk of bias assessment..... 15
- 5. Meta-analysis by individual factor and outcome ..... 22
- COMORBIDITIES ..... 22
- DEMOGRAPHIC, OCCUPATIONAL OR LIFESTYLE FACTORS ..... 49
- 6. Meta-analysis of Comorbidities and Hospitalisation..... 58
- 7. Meta-analysis of Comorbidities and ICU admission..... 63
- 8. Meta-analysis of Comorbidities and Death..... 65
- 9. Meta-analysis of Epidemiologic Factors and hospitalisation ..... 68
- 10. Meta-analysis of Epidemiologic Factors and ICU admission ..... 70
- 11. Meta-analysis of Epidemiologic Factors and death..... 71
- 12. References..... 72

1. [Flow chart of study selection based on the rapid review.](#)

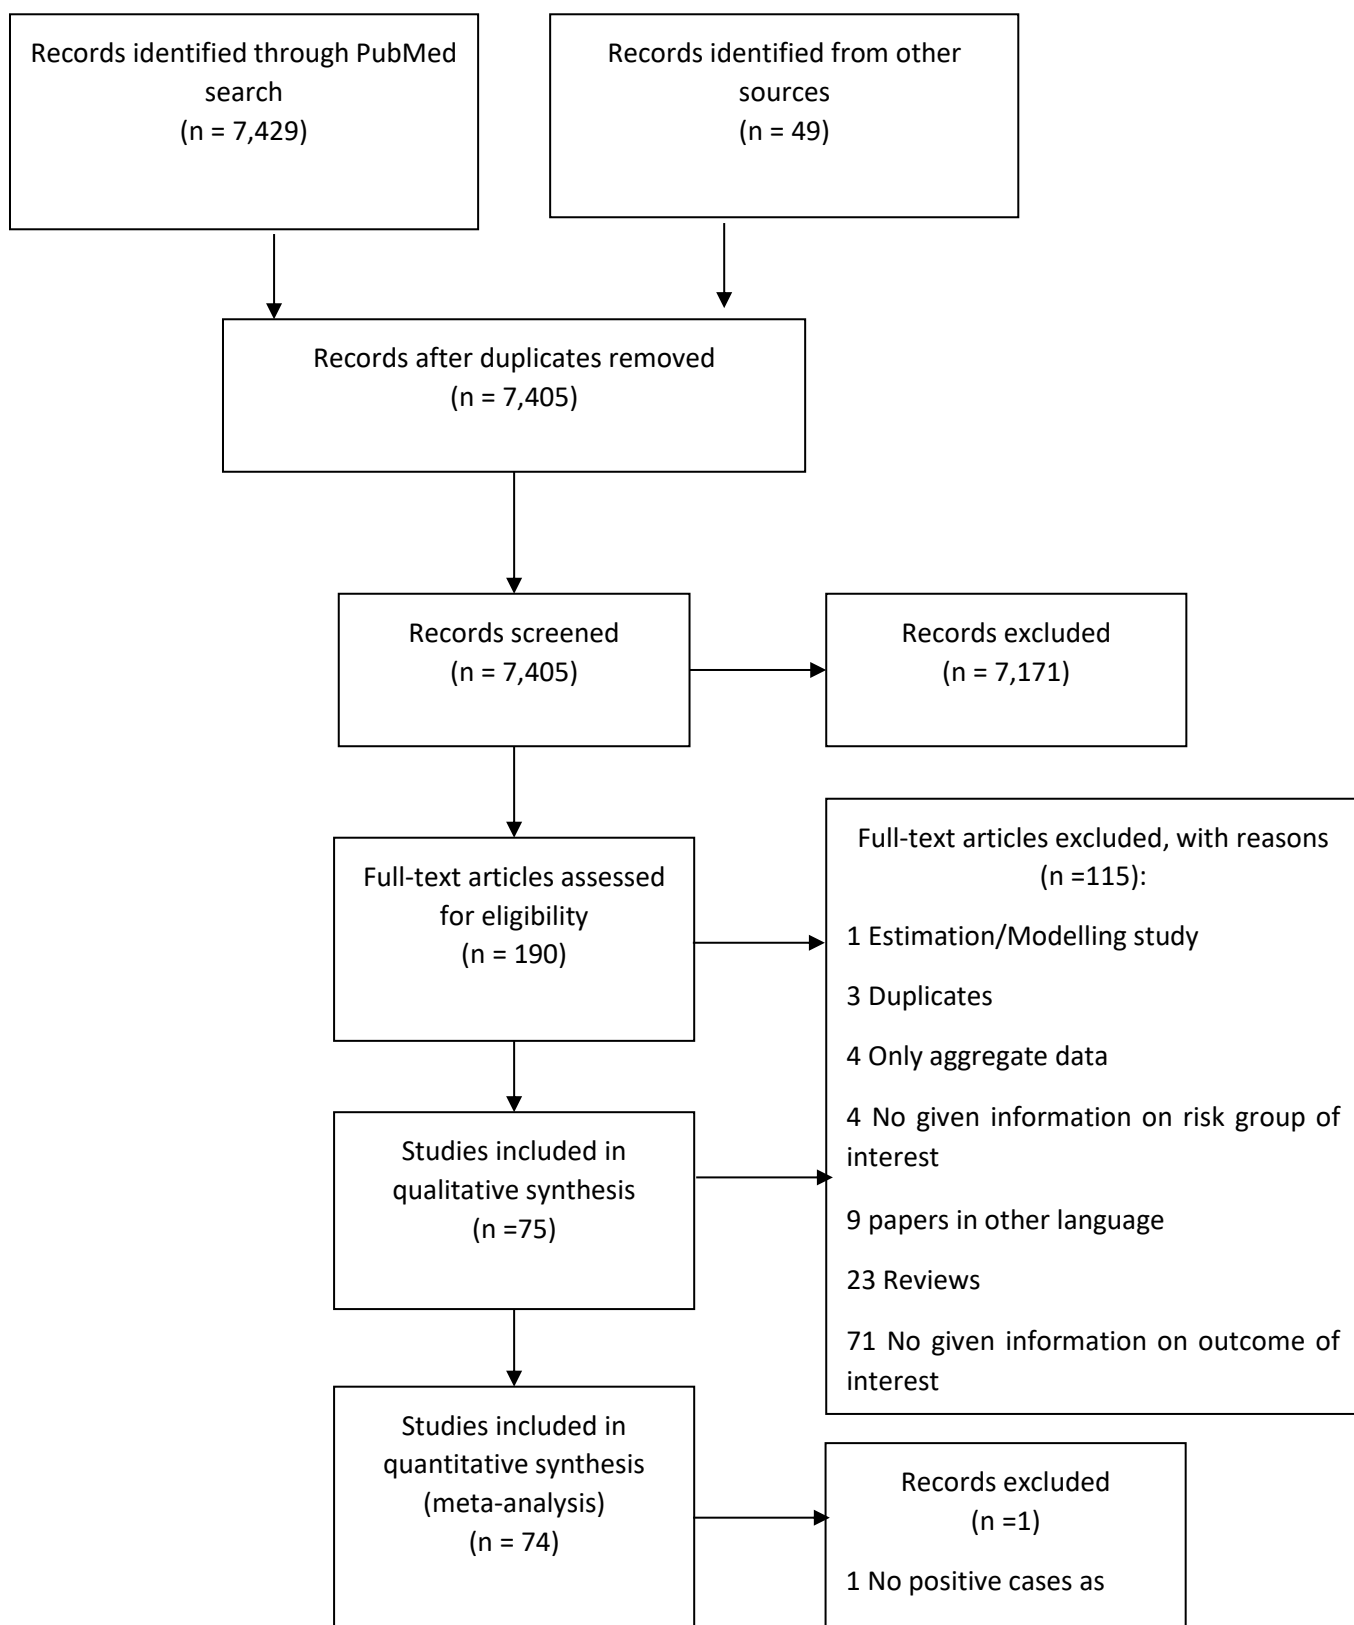

Figure 1. Flow chart of study selection based on the rapid review.

## 2. Published Systematic Reviews as obtained from PubMed search

*Table 1. Published Systematic Reviews as obtained from PubMed search*

| First Author             | Topic                                                                                                                                                       | Date published | Journal       | Population                                                                                                                                 | Exposure                              | Comparison                                                                                               | Outcome                                           | Number of studies included | Value added by our review                                 |
|--------------------------|-------------------------------------------------------------------------------------------------------------------------------------------------------------|----------------|---------------|--------------------------------------------------------------------------------------------------------------------------------------------|---------------------------------------|----------------------------------------------------------------------------------------------------------|---------------------------------------------------|----------------------------|-----------------------------------------------------------|
| <b>Several exposures</b> |                                                                                                                                                             |                |               |                                                                                                                                            |                                       |                                                                                                          |                                                   |                            |                                                           |
| Couper, K. et al (76).   | Association between key resuscitation interventions (chest compressions, defibrillation, CPR) and aerosol generation and airborne transmission of infection | Apr 20, 2020   | Resuscitation | Rescuers (healthcare worker or lay person) delivery chest compressions &/or defibrillation &/or CPR to a person suffering a cardiac arrest | COVID-19                              | Chest compressions and/or defibrillation and/or CPR, with or without PPE (personal protective equipment) | Aerosol generation, or transmission of infection. | 11                         | Inclusion of other comorbidities and interaction with age |
| Hu, Y. et al (77).       | Risk factors of COVID-19                                                                                                                                    | Apr 14, 2020   | J Clin Virol  | Patients diagnosed with COVID-19                                                                                                           | Patient characteristics (gender, age, | Comparison of different outcomes                                                                         | Symptoms, ARDS, ACI (acute cardiac injury), AKI   | 21                         | Inclusion of other comorbidities and                      |

|                        |                                                                                                |              |                                   |                                            |                                                                                       |                                                                  |                                                                                                                                                                            |    |                                                                                                                   |
|------------------------|------------------------------------------------------------------------------------------------|--------------|-----------------------------------|--------------------------------------------|---------------------------------------------------------------------------------------|------------------------------------------------------------------|----------------------------------------------------------------------------------------------------------------------------------------------------------------------------|----|-------------------------------------------------------------------------------------------------------------------|
|                        |                                                                                                |              |                                   |                                            | comorbidities, etc.)                                                                  |                                                                  | (acute kidney injury), shock, incidence of severity and death                                                                                                              |    | interaction with age                                                                                              |
| Nasiri, M. et al (78). | Better understanding of clinical, laboratory, epidemiologic and mortality findings of COVID-19 | Mar 26, 2020 | Preprint from medRxiv and bioRxiv | Patients diagnosed with COVID-19 by RT-PCR | Clinical manifestations, comorbidities, laboratory findings and radiologic findings   | Comparison of different outcomes & their associated risk factors | Hospitalisation, severe disease, death, ICU admission, mean duration between time of hospitalisation and death                                                             | 32 | Study of different comorbidities and conditions for different outcomes                                            |
| Xu, L. et al (79).     | Risk factors for severe patients with corona virus disease 2019 (COVID-19)                     | Apr 1, 2020  | Preprint from medRxiv and bioRxiv | Patients diagnosed with COVID-19           | Elderly age, male, high body mass index, high breathing rate, and underlying diseases | Severe and non-severe patients                                   | Severe disease (defined as 1)Respiratory distress with respiratory frequency 30/min; 2) Pulse Oximeter Oxygen Saturation 93% at rest; 3) Oxygenation index (artery partial | 20 | Inclusion of deaths and ICU admission as outcomes, calculation of RR based on crude numbers, interaction with age |

|                       |                                                                                                                                     |              |             |                                  |                                                                                              |                                             |                                                                                      |    |                                                                               |
|-----------------------|-------------------------------------------------------------------------------------------------------------------------------------|--------------|-------------|----------------------------------|----------------------------------------------------------------------------------------------|---------------------------------------------|--------------------------------------------------------------------------------------|----|-------------------------------------------------------------------------------|
|                       |                                                                                                                                     |              |             |                                  |                                                                                              |                                             | pressure of oxygen/inspired oxygen fraction, PaO2/FiO2) 300 mmHg (1 mmHg=0.133 kPa)) |    |                                                                               |
| Zhao, Q. et al (80).  | The risk of severe Covid-19 in patients with pre-existing chronic obstructive pulmonary disease (COPD) and ongoing smoking history. | Apr 15, 2020 | J Med Virol | Patients diagnosed with COVID-19 | Pre-existing COPD and ongoing smoking history                                                | Severe and non-severe cases                 | Severe COVID-19 & death                                                              | 11 | Inclusion of other comorbidities and interaction with age                     |
| Zheng, Z. et al (81). | Risk factors for the progression of COVID-19                                                                                        | Apr 23, 2020 | J Infect    | Patients diagnosed with COVID-19 | Sociodemographic (sex, age), behavioural (smoking) and clinical risk factors (comorbidities, | Critical/mortal cases vs non-critical cases | Disease progression: critical case & death                                           | 13 | No limit on recruited participants, calculation of RR based on crude numbers, |

clinical manifestations, laboratory examinations)

interaction with age

**Arterial hypertension**

|                      |                                                                                     |              |          |                                  |                            |                              |                         |   |                                  |
|----------------------|-------------------------------------------------------------------------------------|--------------|----------|----------------------------------|----------------------------|------------------------------|-------------------------|---|----------------------------------|
| Zuin, M. et al (82). | Risk of death in COVID-19 infection patients with and without arterial hypertension | Apr 11, 2020 | J Infect | Patients diagnosed with COVID-19 | Arterial hypertension (HT) | Patients with and without HT | Prevalence of HT, death | 3 | Inclusion of other comorbidities |
|----------------------|-------------------------------------------------------------------------------------|--------------|----------|----------------------------------|----------------------------|------------------------------|-------------------------|---|----------------------------------|

**Cardiovascular**

|                            |                                                                                   |              |                                   |                                                    |                                   |                                                                                 |                                            |    |                                                           |
|----------------------------|-----------------------------------------------------------------------------------|--------------|-----------------------------------|----------------------------------------------------|-----------------------------------|---------------------------------------------------------------------------------|--------------------------------------------|----|-----------------------------------------------------------|
| Li, B. et al (83).         | Association of cardiovascular metabolic diseases with the development of COVID-19 | Mar 11, 2020 | Clinical Research in Cardiology   | Patients diagnosed with COVID-19                   | Cardiovascular metabolic diseases | Patients with Cardiovascular metabolic diseases compared to other comorbidities | ICU/severe and non-ICU/severe              | 6  | Inclusion of other comorbidities and interaction with age |
| Matsushita, K. et al. (84) | Relationship of COVID-19 severity with cardiovascular disease and                 | Apr 28, 2020 | Preprint from medRxiv and bioRxiv | Adult patients (>18 years) diagnosed with COVID-19 | Cardiovascular Disease            | Different Clinical (hypertension, DM, prior CVD) and sociodemographi            | COVID-19 severity (death, ARDS, mechanical | 21 | Inclusion of other comorbidities and                      |

its traditional risk factors.

c (age, sex & smoking) risk factors

ventilation, ICU admission)

interaction with age

## Stroke

|                          |                                                                                       |              |                     |                                                |                                                                                 |                                                                                                                   |                                                                      |    |                                                           |
|--------------------------|---------------------------------------------------------------------------------------|--------------|---------------------|------------------------------------------------|---------------------------------------------------------------------------------|-------------------------------------------------------------------------------------------------------------------|----------------------------------------------------------------------|----|-----------------------------------------------------------|
| Aggarwal, G. et al (85). | Association between stroke and severity of disease or mortality                       | Apr 20, 2020 | Int J Stroke        | COVID-19 patients with Cerebrovascular disease | Stroke (cerebrovascular disease)                                                | Cerebrovascular disease in COVID-19 patients with or without severe disease and in non-survivors versus survivors | Disease severity (Severe disease, death, recovery)                   | 7  | Inclusion of other comorbidities and interaction with age |
| Li, J. W. et al (86).    | Severity differences in acute cardiac injury and acute cardiac injury with mortality. | Apr 16, 2020 | Prog Cardiovasc Dis | Cardiac Injury Patients                        | COVID-19                                                                        | Those admitted to ICU and not admitted, non-survivors and survivors, severe vs non-severe cases                   | Infection severity on cardiac injury, death                          | 22 | Inclusion of other comorbidities and interaction with age |
| Santoso, A. et al (87).  | Association between cardiac injury and mortality, the need for                        | Apr 19, 2020 | Am J Emerg Med      | Patients diagnosed with COVID-19               | Cardiac injury (highly sensitive cardiac troponin I (hs-cTnI) N99th percentile) | Comparison of the association of cardiac injury with different outcomes                                           | Primary outcome was mortality, and the secondary outcomes were ARDS, | 13 | Inclusion of other comorbidities and                      |

intensive care unit (ICU) care, acute respiratory distress syndrome (ARDS), and severe coronavirus disease 2019

the need for ICU care, and severe COVID-19.

interaction with age

**Diabetes**

Composite poor outcome, including mortality, severe COVID-19, acute respiratory distress syndrome (ARDS), need for intensive care unit (ICU) care, and disease progression.

Inclusion of other comorbidities and interaction with age

Huang, I. et al (88). Association between DM and poor outcome in patients with COVID-19 pneumonia

Apr 17, 2020

Diabetes Metab Syndr

COVID-19 patients

DM

Patients with and without DM

30



### 3. Characteristics of the 75 included studies

**Table 2.** Characteristics of the 75 included studies

| First Author*                  | Country | Sample size | Underlying data          | Study time-frame                      | Age-range, Median (IQR), or Median (SD) in years |
|--------------------------------|---------|-------------|--------------------------|---------------------------------------|--------------------------------------------------|
| Cai, Q. et al. (1)             | China   | 298         | Medical/Clinical records | 11 January to 06 February 2020        | Median (IQR): 47 (33-61)                         |
| Cao, J. et al. (2)             | China   | 102         | Medical/Clinical records | 03 January to 15 February 2020        | Median (IQR): 54 (37-67)                         |
| CDC COVID-19 Response Team (3) | USA     | 7162        | Official reported data   | 12 February to 28 March 2020          | all ages                                         |
| Chen, G. et al. (4)            | China   | 21          | Medical/Clinical records | Late December 2019 to 27 January 2020 | Median (IQR): 56 (50 – 65)                       |
| Chen, Q. et al. (5)            | China   | 145         | Medical/Clinical records | 01 January to 11 March 2020           | Mean (SD): 47.5 (14.6)                           |
| Chen, T. et al. (6)            | China   | 799**       | Medical/Clinical records | 13 January to 28 February 2020        | Median (IQR): 62 (44-70)                         |
| Cheng, Y. et al. (7)           | China   | 701         | Medical/Clinical records | 28 January to 11 February 2020        | Median (IQR): 63 (50-71)                         |
| Deng, G. et al. (8)            | China   | 44672       | Official reported data   | Up to 11 February 2020                | -                                                |
| Deng, Q. et al. (9)            | China   | 112         | Medical/Clinical records | 06 January to 20 February 2020        | Median (IQR): 65.0 (49.0-70.8)                   |
| Du, R. et al. (10)             | China   | 109         | Medical/Clinical records | 25 December 2019 to 24 February 2020  | Mean (SD):70.7 (10.9)<br>Range 43-99             |
| Duanmu, Y. et al. (11)         | USA     | 100         | Medical/Clinical records | 04 March to 23 March 2020             | Median: 45                                       |

|                            |       |      |                          |                                     |                                |
|----------------------------|-------|------|--------------------------|-------------------------------------|--------------------------------|
| Fan, J. et al. (12)        | China | 21   | Medical/Clinical records | 18 January to 15 March 2020         | Mean (SD): 62.5 (12.6)         |
| Feng, Y. et al. (13)       | China | 476  | Medical/Clinical records | 01 January to 21 March 2020         | Median (IQR): 53 (40-64)       |
| Goyal, P. et al. (14)      | USA   | 393  | Medical/Clinical records | 03 March to 27 March 2020           | Median (IQR): 62.2 (48.6-73.7) |
| Guan, W. et al. (15)       | China | 1590 | Medical/Clinical records | 21 November 2019 to 31 January 2020 | Mean (SD): 48.9 (16.3)         |
| Guan, Wei-jie. et al. (16) | China | 1099 | Medical/Clinical records | 11 December 2019 to 31 January 2020 | Median (IQR): 47 (35-58)       |
| Guo, T. et al. (17)        | China | 187  | Medical/Clinical records | 23 January to 23 February 2020      | Mean (SD): 58.50 (14.66)       |
| Huang, C. et al. (18)      | China | 41   | Medical/Clinical records | 16 December 2019 to 22 January 2020 | Median (IQR): 49 (41–58)       |
| Ji, D. et al. (19)         | China | 208  | Medical/Clinical records | 20 January to 18 March 2020         | Mean (SD): 44.0 (16.3)         |
| Ji, Dong. et al. (20)      | China | 202  | Medical/Clinical records | 20 January to 17 February 2020      | Median (IQR): 44.5 (34.8-54.1) |
| Kalligeros, M. et al.(21)  | USA   | 103  | Medical/Clinical records | 17 February to 05 April 2020        | Median (IQR): 60 (52-70)       |
| Lei, S. et al. (22)        | China | 34   | Medical/Clinical records | 01 January to 05 February 2020      | Median (IQR): 55 (43-63)       |
| Li, K. et al. (23)         | China | 83   | Medical/Clinical records | January to February 2020            | Mean (SD): 45.5 (12.3)         |
| Li, X. et al. (24)         | China | 548  | Medical/Clinical records | 26 January to 03 March 2020         | Median (IQR): 60 (48-69)       |
| Li, Y. et al. (25)         | China | 25   | Medical/Clinical records | 01 January to 03 March 2020         | Median: 51<br>Range: 22-69     |
| Liang, W. et al. (26)      | China | 1590 | Medical/Clinical records | <31 January 2020                    | -                              |
| Liu, Jing. et al. (27)     | China | 40   | Medical/Clinical records | 05 January to 24 January 2020       | Mean (SD): 48.7 (13.9)         |

|                               |        |      |                          |                                     |                                          |
|-------------------------------|--------|------|--------------------------|-------------------------------------|------------------------------------------|
| Liu, Jingyuan. et al. (28)    | China  | 61   | Medical/Clinical records | 13 January to 31 January 2020       | Median: 40<br>Range: 01-86               |
| Liu, W. et al. (29)           | China  | 78   | Medical/Clinical records | 30 December 2019 to 15 January 2020 | Median (Q1,Q3): 38 (33,57)               |
| Liu, Y. et al. (30)           | China  | 109  | Medical/Clinical records | 02 January to 12 February 2020      | Mean (IQR): 55 (43-66)<br>Range 22-94    |
| Ma, J. et al. (31)            | China  | 37   | Medical/Clinical records | 01 January to 30 March 2020         | Median (IQR): 62 (59-70)                 |
| Mao, L. et al. (32)           | China  | 214  | Medical/Clinical records | 16 January to 19 February 2020      | Mean (SD): 52.7 (15.5)                   |
| McMichael, T. et al. (33)     | USA    | 167  | Official reported data   | 20 January to 18 March 2020         | Median: 72<br>Range: 21-100              |
| Nikpouraghdam, M. et al. (34) | Iran   | 2964 | Medical/Clinical records | 19 February to 15 April 2020        | Mean (SD): 55.50 (15.15)                 |
| Qin, C. et al. (35)           | China  | 452  | Medical/Clinical records | 10 January to 12 February 2020      | Median (IQR): 58 (47-67)<br>Range: 22-95 |
| Ruan, Q. et al. (36)          | China  | 150  | Medical/Clinical records | -                                   | -                                        |
| Shi, S. et al. (37)           | China  | 416  | Medical/Clinical records | 20 January to 15 February 2020      | Median: 64<br>Range: 21-95               |
| Shi, Y. et al. (38)           | China  | 487  | Medical/Clinical records | January to 17 February 2020         | Mean (SD): 46 (19)                       |
| Simonnet, A. et al. (39)      | France | 124  | Medical/Clinical records | 27 February to 06 April 2020        | Median (IQR): 60 (51-70)                 |
| Sun, S. et al. (40)           | China  | 116  | Medical/Clinical records | 19 January to 20 February 2020      | Median (IQR): 47.0 (37.0–54.5)           |

|                                                                           |       |       |                          |                                      |                                         |
|---------------------------------------------------------------------------|-------|-------|--------------------------|--------------------------------------|-----------------------------------------|
| Tang, N. et al. (41)                                                      | China | 183   | Medical/Clinical records | 01 January to 13 February 2020       | Mean (SD): 54.1 (16.2)<br>Range: 14-94  |
| The Novel Coronavirus Pneumonia Emergency Response Epidemiology Team (42) | China | 44672 | Official reported data   | 31 December 2019 to 11 February 2020 | all ages                                |
| Tian, S. et al. (43)                                                      | China | 262   | Medical/Clinical records | 20 January to 10 February 2020       | Median: 47.5<br>Range: 1-94             |
| Tomlins, J. et al. (44)                                                   | UK    | 95    | Medical/Clinical records | 10 March to 06 April 2020            | Median (IQR): 75 (59-82)                |
| Wan, S. et al. (45)                                                       | China | 135   | Medical/Clinical records | 23 January to 08 February 2020       | Median (IQR): 47 (36-55)                |
| Wang, Dawei et al. (46)                                                   | China | 107   | Medical/Clinical records | Up to 10 February 2020               | Median (IQR): 51 (36-65)                |
| Wang, D. et al. (47)                                                      | China | 138   | Medical/Clinical records | 01 January to 03 February 2020       | Median (IQR): 56 (42-68)<br>Range 22-92 |
| Wang, L. et al. (48)                                                      | China | 339   | Medical/Clinical records | 01 January to 05 March 2020          | Median (IQR): 69 (65-76)                |
| Wang, R. et al. (49)                                                      | China | 125   | Medical/Clinical records | 20 January to 18 February 2020       | Mean (SD): 38.76 (13.79)                |
| Wang, X. et al. (50)                                                      | China | 1012  | Medical/Clinical records | 7 February to 22 February 2020       | Median (IQR): 50 (39-58)<br>Range 16-89 |
| Wang, Y. et al. (51)                                                      | China | 344   | Medical/Clinical records | 25 January to 25 February 2020       | Median (IQR): 64 (52-72)                |
| Wei, X. et al. (52)                                                       | China | 252   | Medical/Clinical records | 13 February to 03 March 2020         | Mean (SD): 64.8 (13.3)                  |
| Wei, YY. et al. (53)                                                      | China | 167   | -                        | -                                    | Mean (SD): 42.31 (15.29)                |

|                               |         |          |                          |                                      |                                          |
|-------------------------------|---------|----------|--------------------------|--------------------------------------|------------------------------------------|
| Williamson, E. et al. (54)*** | England | 17425445 | Official reported data   | 01 February to 25 April 2020         | -                                        |
| Wu, C. et al. (55)            | China   | 201      | Medical/Clinical records | 25 December 2019 to 13 February 2020 | Median (IQR): 51 (43-60)<br>Range: 21-83 |
| Xiao, G. et al. (56)          | China   | 287      | Medical/Clinical records | 05 January to 08 March 2020          | Median (IQR): 62 (51-70)                 |
| Xie, H. et al. (57)           | China   | 79       | Medical/Clinical records | 02 February to 23 February 2020      | Median: 60<br>Range: 27-87               |
| Xu, Y. (58)                   | China   | 50       | Medical/Clinical records | January to February 2020             | Mean (SD): 43.9 (16.8)<br>Range: 3-85    |
| Yan, Y. et al. (59)           | China   | 193      | Medical/Clinical records | 10 January to 24 February 2020       | Median (IQR): 64 (49-73)                 |
| Yang, X. et al. (60)          | China   | 52       | Medical/Clinical records | 24 December 2019 to 09 February 2020 | Mean (SD): 59.7 (13.3)                   |
| Yao, Q. et al. (61)           | China   | 108      | Medical/Clinical records | 30 January to 11 February 2020       | Median (IQR): 52 (37-58)                 |
| Yu, X. et al. (62)            | China   | 92       | Medical/Clinical records | 19 January to 19 March 2020          | Mean (SD): 55 (16)                       |
| Yuan, M. et al. (63)          | China   | 27       | Medical/Clinical records | 1 January 2020 to 25 January 2020    | Median (IQR): 60 (47-69)                 |
| Zhang, G. et al. (64)         | China   | 221      | Medical/Clinical records | 02 January to 10 February 2020       | Median (IQR): 55.0 (39.0-66.5)           |
| Zhang, J. et al. (65)         | China   | 19       | Medical/Clinical records | 16 January to 20 February 2020       | Median: 73                               |
| Zhang, Jixiang. et al. (66)   | China   | 663      | Medical/Clinical records | 11 January to 06 February 2020       | Median (IQR): 55.6 (44-69)               |
| Zhang, Jin-jin. et al. (67)   | China   | 140      | Medical/Clinical records | 16 January to 03 February 2020       | Median: 57<br>Range: 25-87               |

|                        |       |     |                          |                                     |                                          |
|------------------------|-------|-----|--------------------------|-------------------------------------|------------------------------------------|
| Zhang, Y. et al. (68)  | China | 80  | Medical/Clinical records | January to February 2020            | Median (IQR): 49.5 (37.75-63.5)          |
| Zhao, X. et al. (69)   | China | 91  | Medical/Clinical records | 16 January to 10 February 2020      | Median: 46                               |
| Zheng, Kl. et al. (70) | China | 66  | Medical/Clinical records | 01 January to 29 February 2020      | Mean: 47                                 |
| Zheng, S. et al. (71)  | China | 96  | Medical/Clinical records | 19 January to 20 March 2020         | Median (IQR): 55 (44.3-64.8)             |
| Zheng, F. et al. (72)  | China | 161 | Medical/Clinical records | 17 January to 07 February 2020      | Median (IQR): 45 (33.5-57)               |
| Zhou, F. et al. (73)   | China | 191 | Medical/Clinical records | 29 December 2019 to 31 January 2020 | Median (IQR): 56 (46-67)<br>Range: 18-87 |
| Zhu, Z. et al. (74)    | China | 127 | Medical/Clinical records | 23 January to 20 February 2020      | Mean (SD): 50.90 (15.26)                 |
| Zou, Y. et al. (75)    | China | 303 | Medical/Clinical records | 20 January to 24 February 2020      | Median: 51                               |

---

\*All the studies were published in 2020

\*\* Analysis based on 274 patients

\*\*\*National primary care electronic health record data linked to in-hospital COVID-19 death data

#### 4. Results of the risk of bias assessment

**Table 3.** Results of the risk of bias assessment

| First Author     | Bias due to confounding                                                                                                  | Bias due to selection of participants and follow-up                                                                                                                                                                                                           | Bias due to misclassification of exposure                                                        | Bias due to missing data                                                                                                                                                                                  | Bias in measurement of outcome                                                                                                                     | Bias in selection of the reported                                                                              |
|------------------|--------------------------------------------------------------------------------------------------------------------------|---------------------------------------------------------------------------------------------------------------------------------------------------------------------------------------------------------------------------------------------------------------|--------------------------------------------------------------------------------------------------|-----------------------------------------------------------------------------------------------------------------------------------------------------------------------------------------------------------|----------------------------------------------------------------------------------------------------------------------------------------------------|----------------------------------------------------------------------------------------------------------------|
| <b>Criteria*</b> | <b>low</b> if stratification/adjustment for age - <b>moderate</b> if age information - <b>high</b> if no age information | <b>low</b> if follow-up well documented for all risk groups up to intended follow-up time - <b>moderate</b> if not well reported for all groups - <b>high</b> if different follow-up time for different groups or follow-up not until endpoint for all groups | <b>low</b> if medical records - <b>moderate</b> if self-reported - <b>high</b> if unclear source | <b>low</b> if outcome data available for all and missing data reported - <b>moderate</b> if some missing data reported but not all - <b>high</b> if participants excluded on large scale for missing data | <b>low</b> if outcome definition reported and well classified, <b>moderate</b> if no report, but clear meaning, <b>high</b> if no report available | <b>low</b> if subgroup reporting seems adequate and not selective, <b>high</b> if selective subgroup reporting |

|                              |          |          |                                 |          |          |      |
|------------------------------|----------|----------|---------------------------------|----------|----------|------|
| Cai, Q. et al.               | moderate | low      | low                             | high     | low      | low  |
| Cao, J. et al.               | moderate | low      | low                             | high     | low      | low  |
| CDC COVID-19 Response Team   | moderate | moderate | low (public health departments) | low      | low      | low  |
| Chen, G. et al.              | moderate | low      | low                             | high     | low      | low  |
| Chen, Q. et al.              | moderate | moderate | low                             | high     | low      | low  |
| Chen, T. et al.              | low      | moderate | low                             | low      | low      | low  |
| Cheng, Y. et al.             | low      | low      | low                             | high     | low      | low  |
| Deng, G. et al.              | moderate | moderate | low                             | moderate | low      | low  |
| Deng, Q. et al.              | moderate | low      | low                             | high     | low      | low  |
| Du, R. et al.                | moderate | low      | low                             | high     | low      | low  |
| Duanmu, Y. et al.            | moderate | moderate | low                             | high     | low      | low  |
| Fan, J. et al.               | moderate | low      | low                             | high     | low      | low  |
| Feng, Y. et al.              | moderate | low      | low                             | high     | low      | low  |
| Goyal, P. et al.             | moderate | low      | low                             | high     | low      | low  |
| Guan, W. et al. Eur Respir J | low      | moderate | low                             | moderate | moderate | high |



|                              |          |          |     |          |          |     |
|------------------------------|----------|----------|-----|----------|----------|-----|
| Guan, W. et al. N Engl J Med | moderate | low      | low | low      | low      | low |
| Guo, T. et al.               | moderate | moderate | low | high     | low      | low |
| Huang, C. et al              | moderate | low      | low | low      | low      | low |
| Ji, D. et al.                | moderate | low      | low | high     | low      | low |
| Ji, Dong. et al.             | moderate | low      | low | high     | low      | low |
| Kalligeros, M. et al.        | moderate | low      | low | high     | low      | low |
| Lei, S. et al.               | moderate | low      | low | low      | low      | low |
| Li, K. et al.                | moderate | moderate | low | high     | low      | low |
| Li, X. et al.                | low      | low      | low | moderate | low      | low |
| Li, Y. et al                 | moderate | low      | low | low      | low      | low |
| Liang, W. et al              | low      | moderate | low | moderate | moderate | low |
| Liu, Jing. et al.            | moderate | moderate | low | high     | high     | low |
| Liu, Jingyuan. et al.        | moderate | moderate | low | high     | low      | low |
| Liu, W. et al                | moderate | low      | low | low      | low      | low |
| Liu, Y. et al.               | moderate | moderate | low | high     | low      | low |

|                                                    |          |          |          |          |          |          |
|----------------------------------------------------|----------|----------|----------|----------|----------|----------|
| Ma, J. et al.                                      | moderate | moderate | low      | high     | low      | low      |
| Mao, L. et al.                                     | moderate | moderate | low      | low      | low      | low      |
| McMichael, T. et al.                               | moderate | moderate | low      | moderate | moderate | low      |
| Nikpouraghdam, M. et al.                           | low      | moderate | low      | low      | low      | low      |
| Quin, C. et al                                     | low      | moderate | low      | low      | low      | low      |
| Ruan, Q. et al.                                    | moderate | moderate | low      | high     | low      | low      |
| Shi, S. et al.                                     | moderate | low      | low      | high     | low      | low      |
| Shi, Y. et al                                      | low      | low      | low      | low      | low      | moderate |
| Simonnet, A. et al.                                | moderate | moderate | low      | high     | low      | low      |
| Sun, S. et al                                      | moderate | low      | low      | high     | low      | low      |
| Tang, N. et al.                                    | moderate | low      | low      | high     | low      | low      |
| The Novel Coronavirus Pneumonia Emergency Response | moderate | moderate | moderate | moderate | low      | low      |

|                    |                                  |          |      |          |          |     |
|--------------------|----------------------------------|----------|------|----------|----------|-----|
| Epidemiology Team  |                                  |          |      |          |          |     |
| Tian, S. et al.    | moderate                         | low      | low  | low      | low      | low |
| Tomlins, J. et al. | moderate                         | low      | low  | high     | low      | low |
| Wan, S. et al      | moderate                         | low      | low  | low      | moderate | low |
| Wang, D. et al     | moderate                         | low      | low  | low      | low      | low |
| Wang, Dawei et al. | low                              | moderate | low  | high     | low      | low |
| Wang, L. et al     | moderate (only elderly included) | moderate | low  | low      | low      | low |
| Wang, R. et al.    | moderate                         | low      | low  | high     | low      | low |
| Wang, X. et al.    | moderate                         | low      | low  | high     | low      | low |
| Wang, Y. et al.    | moderate                         | moderate | low  | moderate | low      | low |
| Wei, X. et al.     | moderate                         | moderate | low  | high     | low      | low |
| Wie, YY. et al.    | moderate                         | moderate | high | high     | low      | low |
| Wu, C. et al.      | moderate                         | low      | low  | moderate | low      | low |

|                        |          |          |              |          |     |     |
|------------------------|----------|----------|--------------|----------|-----|-----|
| Xiao, G. et al.        | moderate | low      | moderate     | moderate | low | low |
| Xie, H. et al.         | moderate | moderate | low          | high     | low | low |
| Xu, Y.                 | moderate | moderate | low          | high     | low | low |
| Yan, Y. et al.         | moderate | low      | low          | low      | low | low |
| Yang, X. et al.        | moderate | low      | low          | low      | low | low |
| Yao, Q. et al.         | moderate | low      | low          | high     | low | low |
| Yu, X. et al.          | moderate | low      | low          | low      | low | low |
| Yuan, M. et al.        | moderate | moderate | low          | high     | low | low |
| Zhang, G. et al        | moderate | low      | low          | low      | low | low |
| Zhang, J. et al        | low      | low      | low/moderate | low      | low | low |
| Zhang, J. et al.       | moderate | moderate | low          | high     | low | low |
| Zhang, Jixiang. et al. | low      | low      | low          | high     | low | low |
| Zhang, Y. et al.       | moderate | moderate | low          | high     | low | low |
| Zhao, X. et al.        | moderate | low      | low          | high     | low | low |
| Zheng, F. et al.       | moderate | moderate | low          | high     | low | low |
| Zheng, Kl. et al.      | moderate | moderate | low          | high     | low | low |
| Zheng, S. et al.       | moderate | moderate | low          | high     | low | low |

|                 |          |          |     |          |     |     |
|-----------------|----------|----------|-----|----------|-----|-----|
| Zhou, F. et al. | low      | moderate | low | moderate | low | low |
| Zhu, Z. et al.  | low      | moderate | low | high     | low | low |
| Zou, Y. et al   | moderate | moderate | low | high     | low | low |

\*Adapted version of ROBINS-I: a tool for assessing risk of bias in non-randomized studies of interventions.

## 5. Meta-analysis by individual factor and outcome

### COMORBIDITIES

#### Acute renal failure

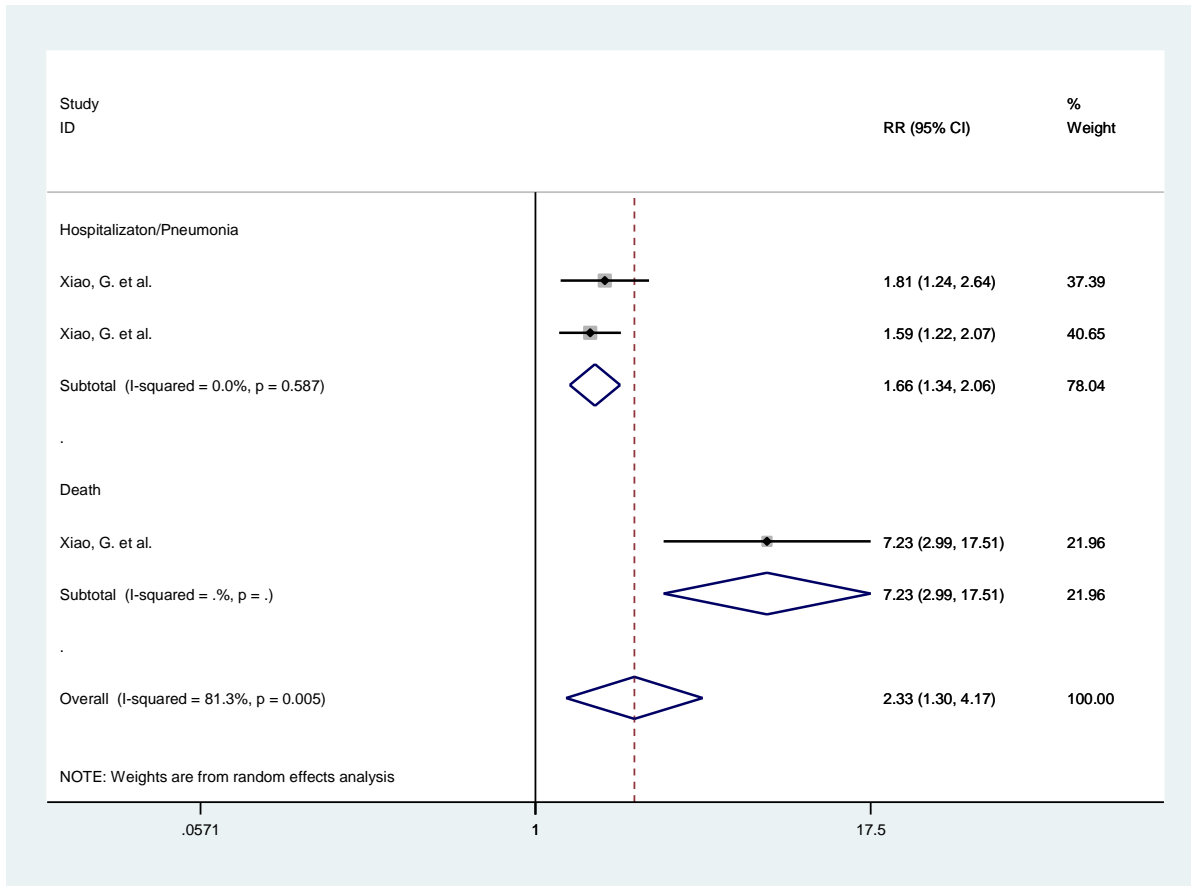

| <b>Study</b>                     | <b>RR</b>    |              | <b>[95% Conf. Interval]</b> |
|----------------------------------|--------------|--------------|-----------------------------|
| <b>Hospitalisation/Pneumonia</b> |              |              |                             |
| Xiao, G. et al.                  | 1.808        | 1.240        | 2.636                       |
| Xiao, G. et al.                  | 1.594        | 1.225        | 2.073                       |
| Sub-total                        |              |              |                             |
| D+L pooled RR                    | <b>1.661</b> | <b>1.338</b> | <b>2.061</b>                |
| <b>Death</b>                     |              |              |                             |
| Xiao, G. et al.                  | 7.231        | 2.986        | 17.514                      |
| Sub-total                        |              |              |                             |
| D+L pooled RR                    | <b>7.231</b> | <b>2.986</b> | <b>17.514</b>               |
| <b>Overall</b>                   |              |              |                             |
| D+L pooled RR                    | <b>2.329</b> | <b>1.299</b> | <b>4.174</b>                |

# Asthma

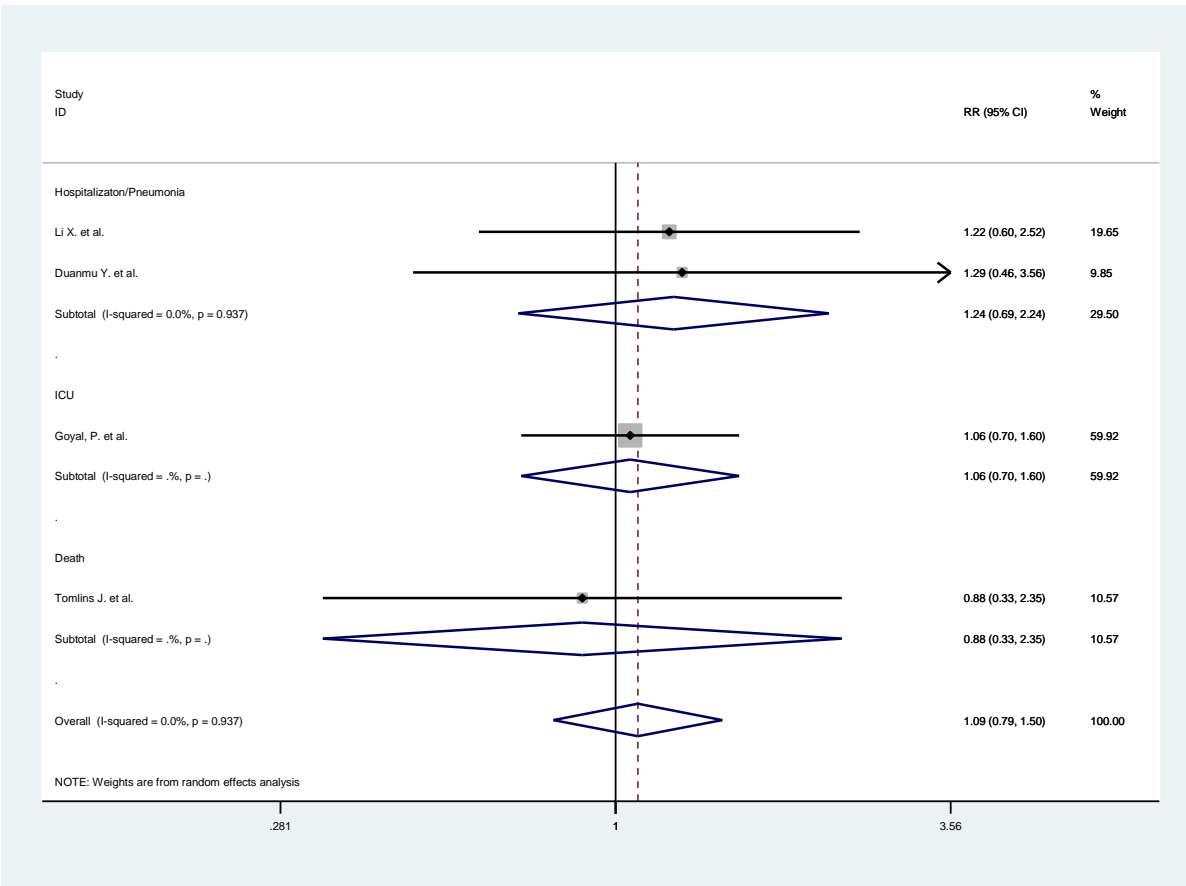



| Study                            | RR    |       | [95% Conf. Interval] |
|----------------------------------|-------|-------|----------------------|
| <b>Hospitalisation/Pneumonia</b> |       |       |                      |
| Li X. et al.                     | 1.225 | 0.596 | 2.518                |
| Duanmu Y. et al.                 | 1.286 | 0.464 | 3.559                |
| Sub-total                        |       |       |                      |
| D+L pooled RR                    | 1.245 | 0.691 | 2.242                |
| <b>ICU</b>                       |       |       |                      |
| Goyal, P. et al.                 | 1.056 | 0.699 | 1.596                |
| Sub-total                        |       |       |                      |
| D+L pooled RR                    | 1.056 | 0.699 | 1.596                |
| <b>Death</b>                     |       |       |                      |
| Tomlins J. et al.                | 0.881 | 0.330 | 2.354                |
| Sub-total                        |       |       |                      |
| D+L pooled RR                    | 0.881 | 0.330 | 2.354                |
| <b>Overall</b>                   |       |       |                      |
| D+L pooled RR                    | 1.088 | 0.790 | 1.497                |

*Cancer*

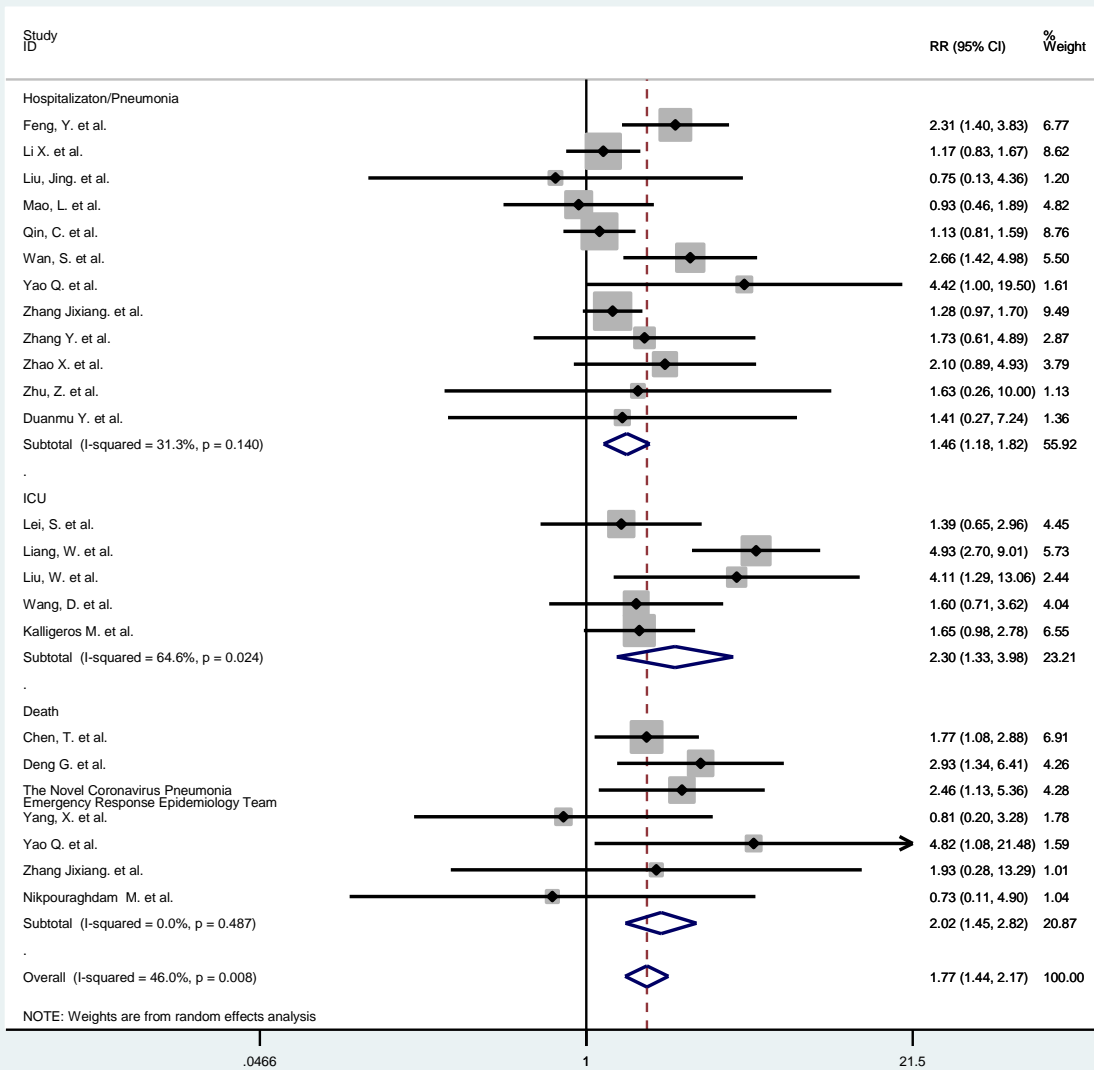

| Study                            | RR           | [95% Conf. Interval] |              |
|----------------------------------|--------------|----------------------|--------------|
| <b>Hospitalisation/Pneumonia</b> |              |                      |              |
| Feng, Y. et al.                  | 2.313        | 1.399                | 3.826        |
| Li X. et al.                     | 1.174        | 0.827                | 1.665        |
| Liu, Jing. et al.                | 0.750        | 0.129                | 4.356        |
| Mao, L. et al.                   | 0.931        | 0.459                | 1.889        |
| Qin, C. et al.                   | 1.134        | 0.808                | 1.591        |
| Wan, S. et al.                   | 2.655        | 1.417                | 4.977        |
| Yao Q. et al.                    | 4.417        | 1.001                | 19.495       |
| Zhang Jixiang. et al             | 1.281        | 0.968                | 1.696        |
| Zhang Y. et al.                  | 1.727        | 0.610                | 4.893        |
| Zhao X. et al.                   | 2.095        | 0.890                | 4.935        |
| Zhu, Z. et al.                   | 1.627        | 0.265                | 9.999        |
| Duanmu Y. et al.                 | 1.406        | 0.273                | 7.244        |
| Sub-total                        |              |                      |              |
| D+L pooled RR                    | <b>1.463</b> | <b>1.177</b>         | <b>1.819</b> |
| <b>ICU</b>                       |              |                      |              |
| Lei, S. et al.                   | 1.389        | 0.652                | 2.959        |
| Liang, W. et al.                 | 4.930        | 2.697                | 9.012        |
| Liu, W. et al.                   | 4.111        | 1.295                | 13.056       |
| Wang, D. et al.                  | 1.600        | 0.707                | 3.619        |
| Kalligeros M. et al.             | 1.649        | 0.977                | 2.782        |
| Sub-total                        |              |                      |              |
| D+L pooled RR                    | <b>2.304</b> | <b>1.333</b>         | <b>3.984</b> |
| <b>Death</b>                     |              |                      |              |
| Chen, T. et al.                  | 1.766        | 1.081                | 2.884        |
| Deng G. et al.                   | 2.926        | 1.337                | 6.406        |
| The Novel Coronaviru             | 2.457        | 1.127                | 5.359        |
| Yang, X. et al.                  | 0.806        | 0.198                | 3.279        |
| Yao Q. et al.                    | 4.818        | 1.081                | 21.476       |
| Zhang Jixiang. et al             | 1.932        | 0.281                | 13.295       |
| Nikpouraghdam M. et              | 0.728        | 0.108                | 4.896        |
| Sub-total                        |              |                      |              |
| D+L pooled RR                    | <b>2.019</b> | <b>1.445</b>         | <b>2.822</b> |
| <b>Overall</b>                   |              |                      |              |
| D+L pooled RR                    | <b>1.769</b> | <b>1.443</b>         | <b>2.167</b> |

Cardiovascular disease

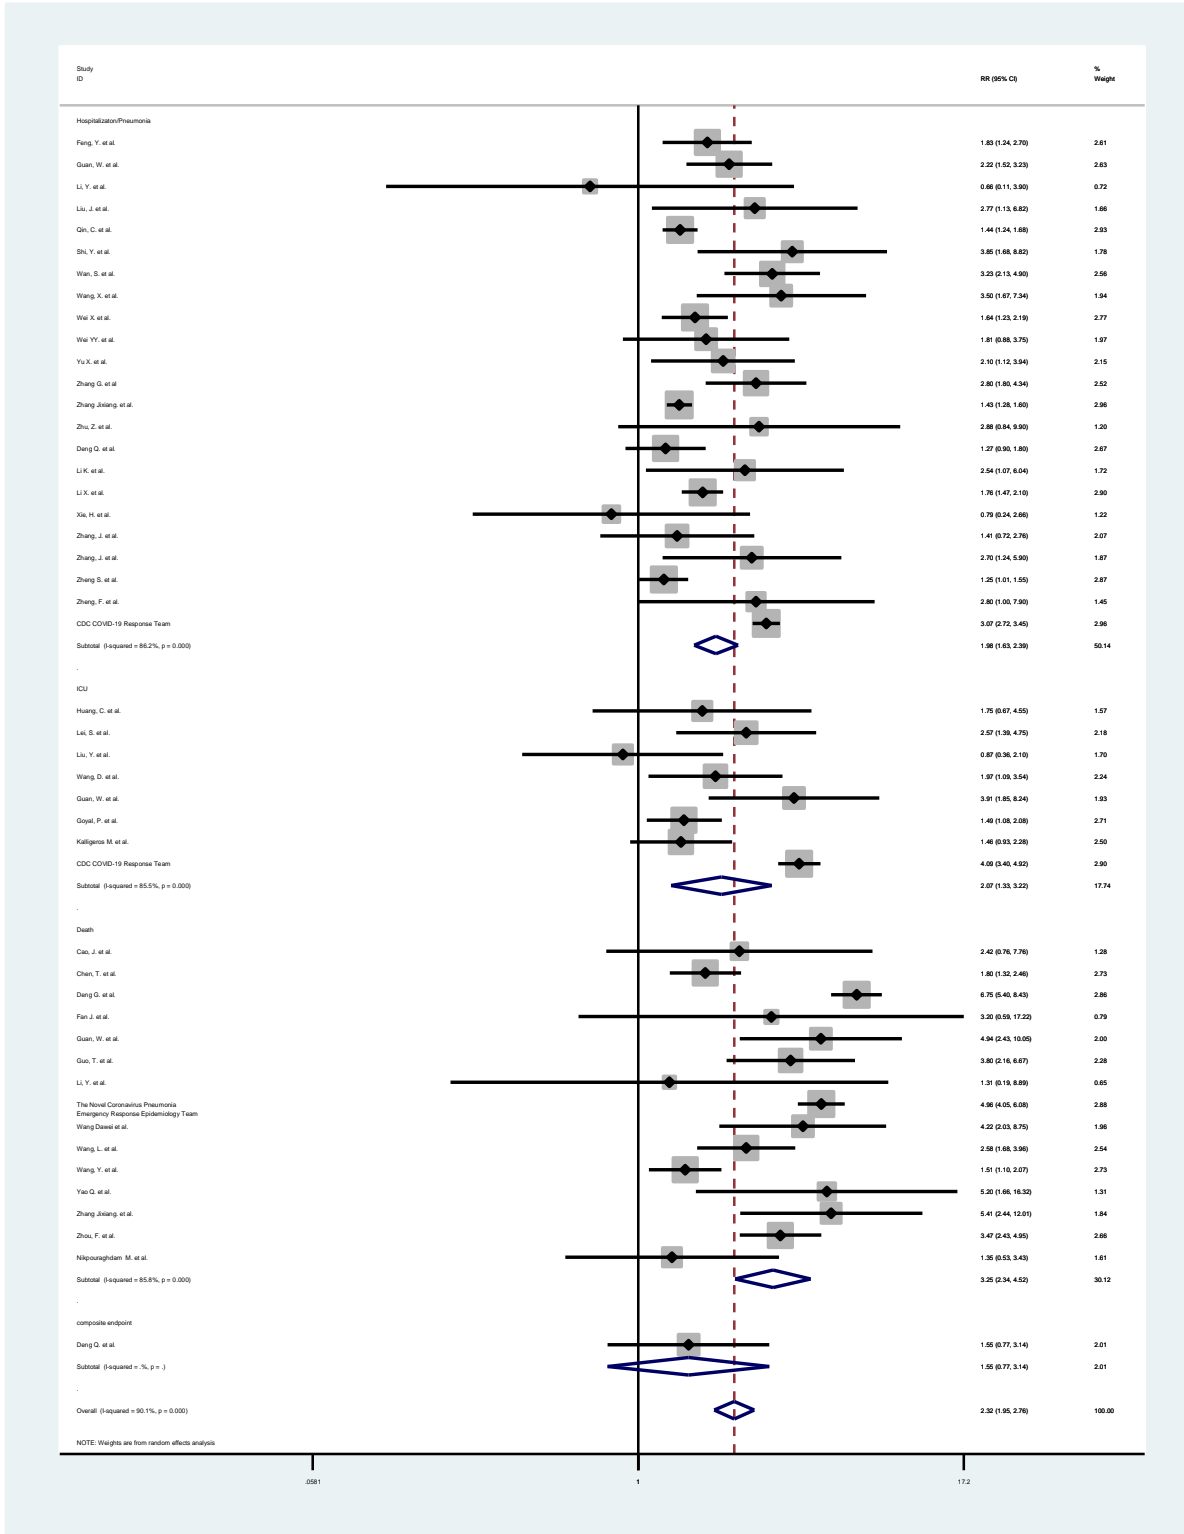

| Study                            | RR    | [95% Conf. Interval] |
|----------------------------------|-------|----------------------|
| <b>Hospitalisation/Pneumonia</b> |       |                      |
| Feng, Y. et al.                  | 1.831 | 1.240 - 2.704        |
| Guan, W. et al.                  | 2.218 | 1.524 - 3.228        |
| Li, Y. et al.                    | 0.656 | 0.110 - 3.902        |

|                      |              |              |              |
|----------------------|--------------|--------------|--------------|
| Liu, J. et al.       | 2.773        | 1.127        | 6.820        |
| Qin, C. et al.       | 1.442        | 1.237        | 1.680        |
| Shi, Y. et al.       | 3.846        | 1.678        | 8.819        |
| Wan, S. et al.       | 3.227        | 2.125        | 4.900        |
| Wang, X. et al.      | 3.498        | 1.668        | 7.338        |
| Wei X. et al.        | 1.642        | 1.229        | 2.192        |
| Wei YY. et al.       | 1.813        | 0.876        | 3.753        |
| Yu X. et al.         | 2.100        | 1.119        | 3.940        |
| Zhang G. et al       | 2.800        | 1.804        | 4.344        |
| Zhang Jixiang. et al | 1.434        | 1.285        | 1.600        |
| Zhu, Z. et al.       | 2.881        | 0.839        | 9.897        |
| Deng Q. et al.       | 1.270        | 0.896        | 1.802        |
| Li K. et al.         | 2.541        | 1.068        | 6.043        |
| Li X. et al.         | 1.756        | 1.466        | 2.104        |
| Xie, H. et al.       | 0.791        | 0.236        | 2.656        |
| Zhang, J. et al.     | 1.407        | 0.718        | 2.761        |
| Zhang, J. et al.     | 2.705        | 1.239        | 5.905        |
| Zheng S. et al.      | 1.250        | 1.008        | 1.550        |
| Zheng, F. et al.     | 2.804        | 0.995        | 7.899        |
| CDC COVID-19 Respons | 3.065        | 2.721        | 3.453        |
| Sub-total            |              |              |              |
| D+L pooled RR        | <b>1.975</b> | <b>1.629</b> | <b>2.394</b> |
| <b>ICU</b>           |              |              |              |
| Huang, C. et al.     | 1.750        | 0.673        | 4.554        |
| Lei, S. et al.       | 2.571        | 1.393        | 4.748        |
| Liu, Y. et al.       | 0.874        | 0.363        | 2.104        |
| Wang, D. et al.      | 1.967        | 1.094        | 3.537        |
| Guan, W. et al.      | 3.905        | 1.851        | 8.239        |
| Goyal, P. et al.     | 1.495        | 1.076        | 2.076        |
| Kalligeros M. et al. | 1.456        | 0.931        | 2.276        |
| CDC COVID-19 Respons | 4.090        | 3.397        | 4.923        |
| Sub-total            |              |              |              |
| D+L pooled RR        | <b>2.071</b> | <b>1.333</b> | <b>3.215</b> |
| <b>Death</b>         |              |              |              |
| Cao, J. et al.       | 2.425        | 0.758        | 7.760        |
| Chen, T. et al.      | 1.800        | 1.318        | 2.459        |
| Deng G. et al.       | 6.749        | 5.404        | 8.429        |
| Fan J. et al.        | 3.200        | 0.595        | 17.224       |
| Guan, W. et al.      | 4.943        | 2.430        | 10.053       |
| Guo, T. et al.       | 3.798        | 2.163        | 6.668        |
| Li, Y. et al.        | 1.313        | 0.194        | 8.888        |
| The Novel Coronaviru | 4.958        | 4.045        | 6.076        |
| Wang Dawei et al.    | 4.218        | 2.033        | 8.750        |
| Wang, L. et al.      | 2.575        | 1.676        | 3.956        |
| Wang, Y. et al.      | 1.506        | 1.097        | 2.068        |
| Yao Q. et al.        | 5.200        | 1.657        | 16.316       |
| Zhang Jixiang. et al | 5.409        | 2.437        | 12.007       |
| Zhou, F. et al.      | 3.468        | 2.428        | 4.954        |
| Nikpouraghdam M. et  | 1.347        | 0.529        | 3.425        |
| Sub-total            |              |              |              |

|                           |              |              |              |
|---------------------------|--------------|--------------|--------------|
| D+L pooled RR             | <b>3.250</b> | <b>2.335</b> | <b>4.522</b> |
| <b>Composite Endpoint</b> |              |              |              |
| Deng Q. et al.            | 1.552        | 0.766        | 3.144        |
| Sub-total                 |              |              |              |
| D+L pooled RR             | 1.552        | 0.766        | 3.144        |
| <b>Overall</b>            |              |              |              |
| D+L pooled RR             | <b>2.317</b> | <b>1.947</b> | <b>2.758</b> |

Cerebrovascular disease

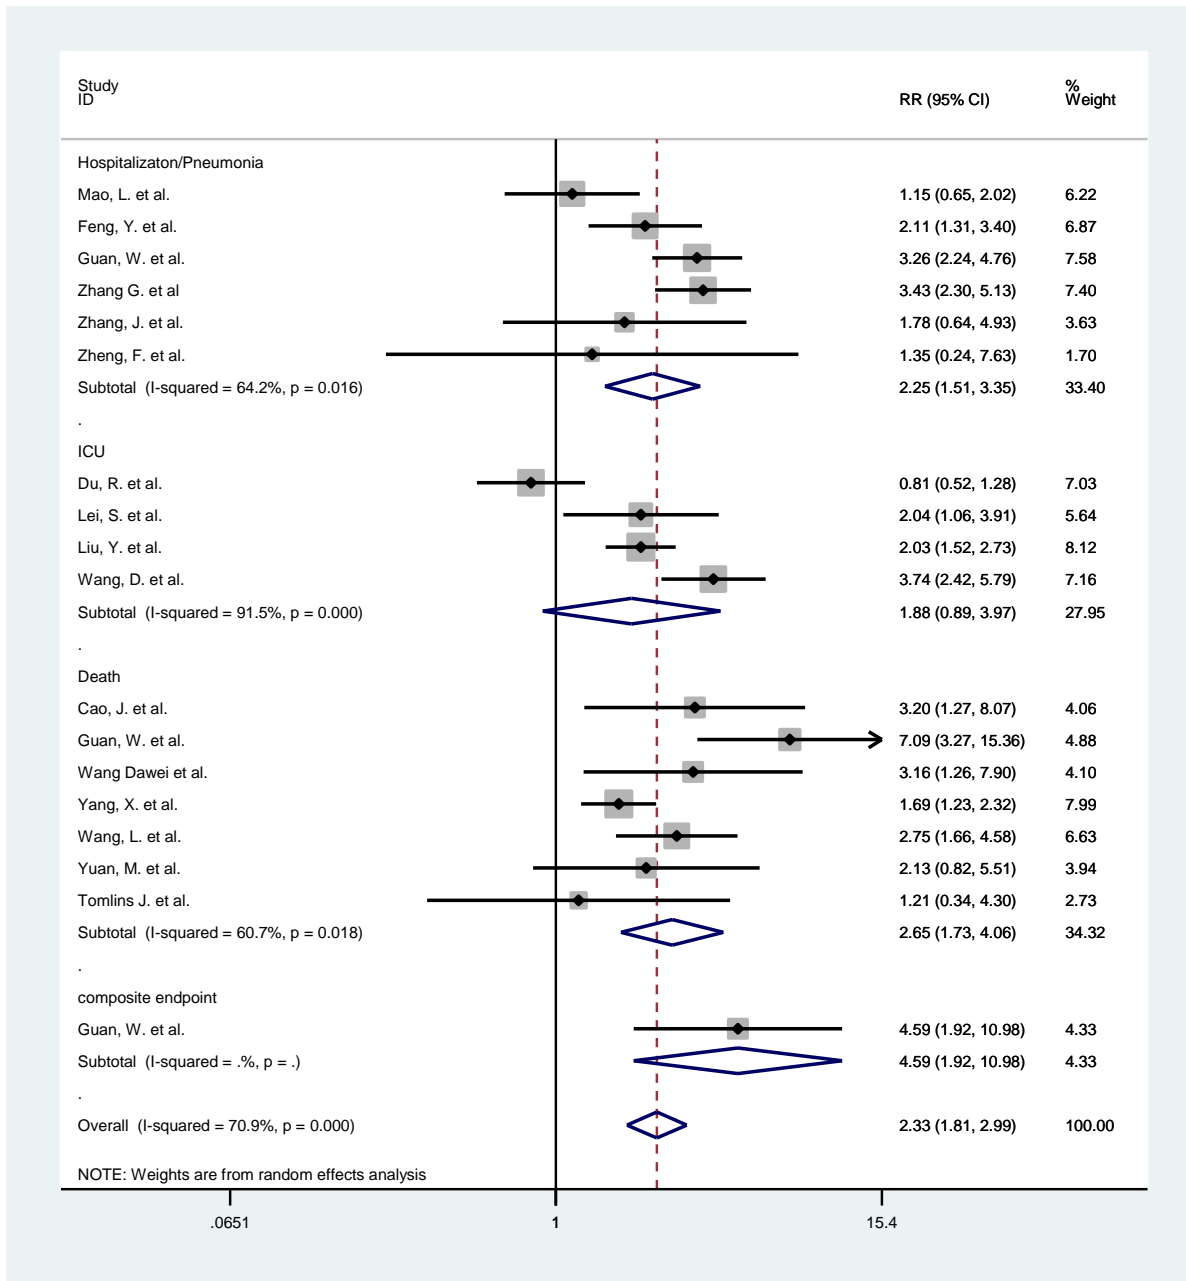

| Study                            | RR    | [95% Conf. Interval] |
|----------------------------------|-------|----------------------|
| <b>Hospitalisation/Pneumonia</b> |       |                      |
| Mao, L. et al.                   | 1.147 | 0.651 2.020          |
| Feng, Y. et al.                  | 2.113 | 1.314 3.399          |
| Guan, W. et al.                  | 3.264 | 2.240 4.755          |

|                           |              |              |              |
|---------------------------|--------------|--------------|--------------|
| Zhang G. et al            | 3.433        | 2.296        | 5.133        |
| Zhang, J. et al.          | 1.778        | 0.641        | 4.930        |
| Zheng, F. et al.          | 1.353        | 0.240        | 7.626        |
| Sub-total                 |              |              |              |
| D+L pooled RR             | <b>2.247</b> | <b>1.509</b> | <b>3.346</b> |
| <b>ICU</b>                |              |              |              |
| Du, R. et al.             | 0.811        | 0.515        | 1.276        |
| Lei, S. et al.            | 2.037        | 1.062        | 3.907        |
| Liu, Y. et al.            | 2.033        | 1.516        | 2.727        |
| Wang, D. et al.           | 3.743        | 2.420        | 5.789        |
| Sub-total                 |              |              |              |
| D+L pooled RR             | 1.884        | 0.895        | 3.967        |
| <b>Death</b>              |              |              |              |
| Cao, J. et al.            | 3.200        | 1.268        | 8.073        |
| Guan, W. et al.           | 7.091        | 3.274        | 15.356       |
| Wang Dawei et al.         | 3.156        | 1.261        | 7.902        |
| Yang, X. et al.           | 1.691        | 1.234        | 2.317        |
| Wang, L. et al.           | 2.753        | 1.655        | 4.580        |
| Yuan, M. et al.           | 2.132        | 0.824        | 5.511        |
| Tomlins J. et al.         | 1.208        | 0.340        | 4.297        |
| Sub-total                 |              |              |              |
| D+L pooled RR             | <b>2.647</b> | <b>1.725</b> | <b>4.062</b> |
| <b>Composite Endpoint</b> |              |              |              |
| Guan, W. et al.           | 4.588        | 1.917        | 10.982       |
| Sub-total                 |              |              |              |
| D+L pooled RR             | 4.588        | 1.917        | 10.982       |
| <b>Overall</b>            |              |              |              |
| D+L pooled RR             | <b>2.326</b> | <b>1.812</b> | <b>2.987</b> |

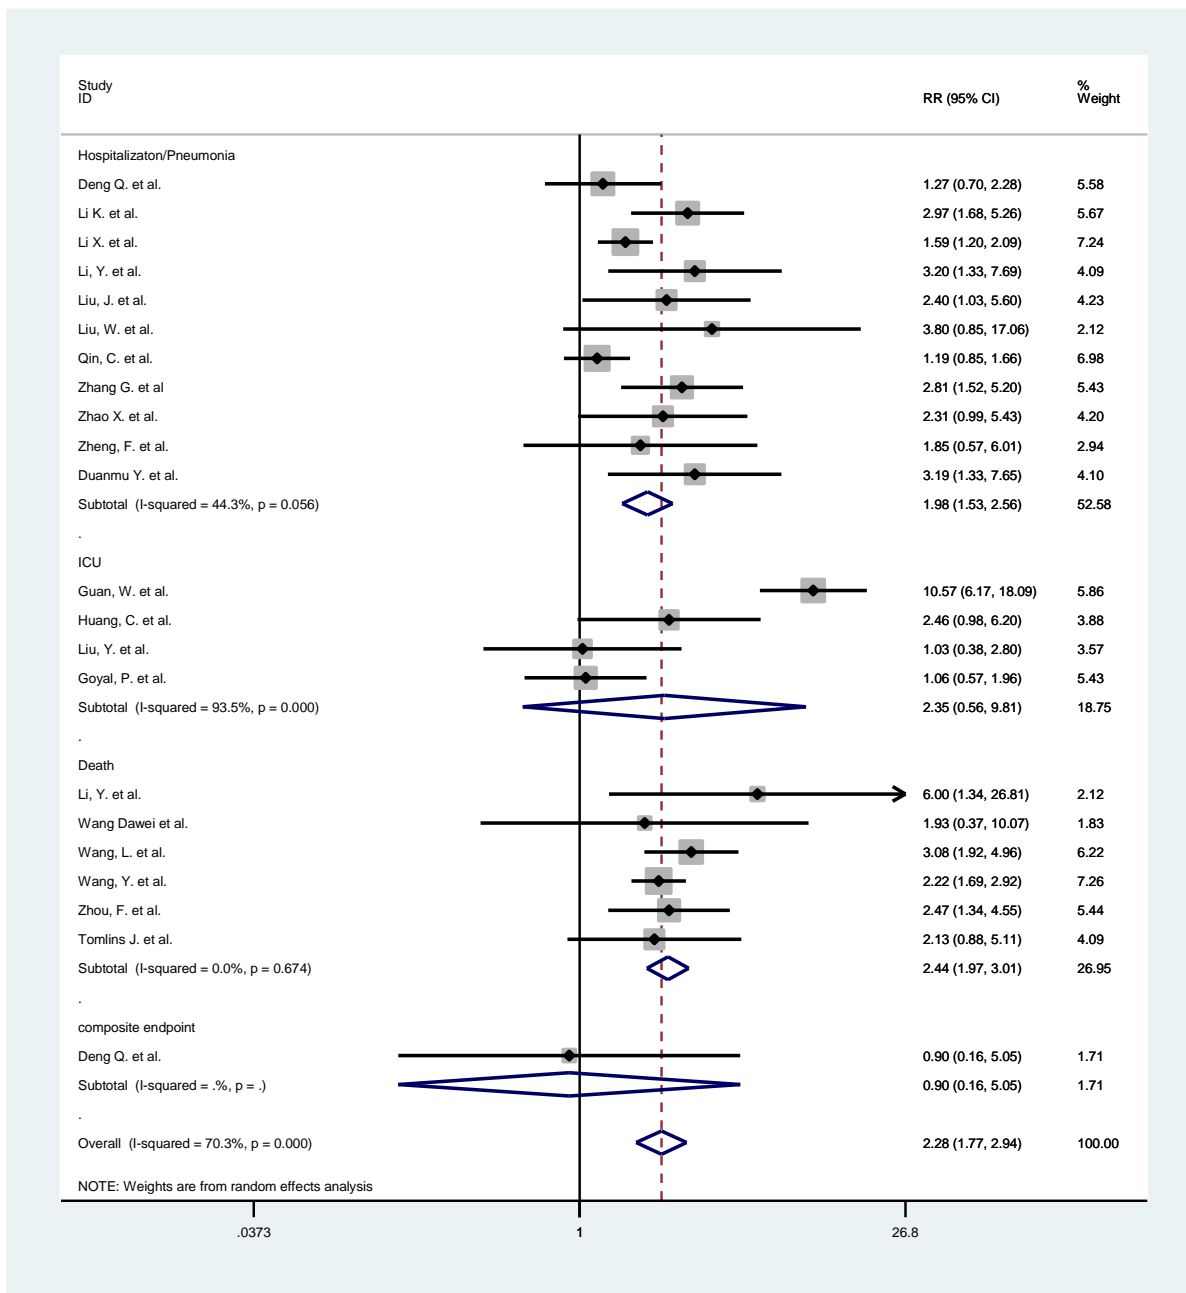

| Study                            | RR    | [95% Conf. Interval] |
|----------------------------------|-------|----------------------|
| <b>Hospitalisation/Pneumonia</b> |       |                      |
| Deng Q. et al.                   | 1.266 | 0.704 - 2.276        |
| Li K. et al.                     | 2.971 | 1.679 - 5.258        |
| Li X. et al.                     | 1.586 | 1.201 - 2.095        |
| Li, Y. et al.                    | 3.200 | 1.332 - 7.688        |
| Liu, J. et al.                   | 2.400 | 1.029 - 5.600        |
| Liu, W. et al.                   | 3.800 | 0.847 - 17.055       |
| Qin, C. et al.                   | 1.191 | 0.853 - 1.664        |
| Zhang G. et al.                  | 2.810 | 1.520 - 5.196        |
| Zhao X. et al.                   | 2.314 | 0.986 - 5.431        |
| Zheng, F. et al.                 | 1.845 | 0.567 - 6.006        |
| Duanmu Y. et al.                 | 3.191 | 1.331 - 7.655        |



|                           |              |              |              |
|---------------------------|--------------|--------------|--------------|
| Sub-total                 |              |              |              |
| D+L pooled RR             | <b>1.982</b> | <b>1.535</b> | <b>2.559</b> |
| <b>ICU</b>                |              |              |              |
| Guan, W. et al.           | 10.568       | 6.173        | 18.094       |
| Huang, C. et al.          | 2.460        | 0.976        | 6.198        |
| Liu, Y. et al.            | 1.029        | 0.379        | 2.797        |
| Goyal, P. et al.          | 1.061        | 0.574        | 1.962        |
| Sub-total                 |              |              |              |
| D+L pooled RR             | 2.352        | 0.564        | 9.810        |
| <b>Death</b>              |              |              |              |
| Li, Y. et al.             | 6.000        | 1.343        | 26.808       |
| Wang Dawei et al.         | 1.926        | 0.368        | 10.074       |
| Wang, L. et al.           | 3.085        | 1.919        | 4.959        |
| Wang, Y. et al.           | 2.221        | 1.687        | 2.924        |
| Zhou, F. et al.           | 2.467        | 1.336        | 4.555        |
| Tomlins J. et al.         | 2.125        | 0.883        | 5.114        |
| Sub-total                 |              |              |              |
| D+L pooled RR             | <b>2.436</b> | <b>1.972</b> | <b>3.009</b> |
| <b>Composite Endpoint</b> |              |              |              |
| Deng Q. et al.            | 0.900        | 0.160        | 5.048        |
| Sub-total                 |              |              |              |
| D+L pooled RR             | 0.900        | 0.160        | 5.048        |
| <b>Overall</b>            |              |              |              |
| D+L pooled RR             | <b>2.279</b> | <b>1.766</b> | <b>2.942</b> |

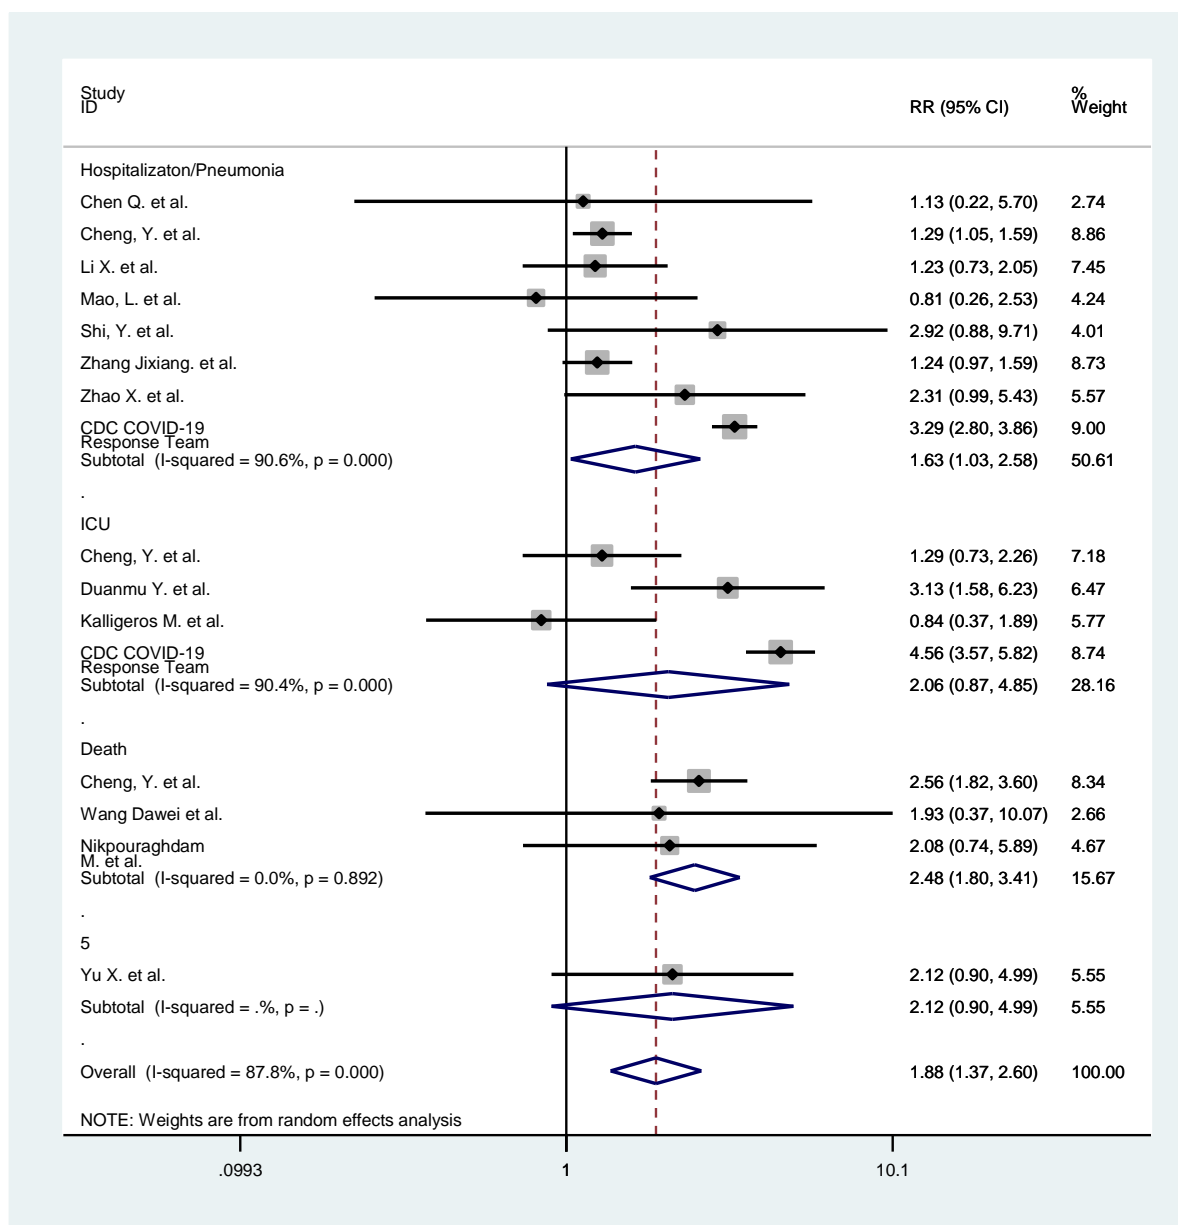

| Study                            | RR           | [95% Conf. Interval] |
|----------------------------------|--------------|----------------------|
| <b>Hospitalisation/Pneumonia</b> |              |                      |
| Chen Q. et al.                   | 1.127        | 0.223 - 5.696        |
| Cheng, Y. et al.                 | 1.290        | 1.047 - 1.591        |
| Li X. et al.                     | 1.225        | 0.733 - 2.047        |
| Mao, L. et al.                   | 0.806        | 0.257 - 2.529        |
| Shi, Y. et al.                   | 2.918        | 0.877 - 9.711        |
| Zhang Jixiang. et al             | 1.245        | 0.972 - 1.593        |
| Zhao X. et al.                   | 2.314        | 0.986 - 5.431        |
| CDC COVID-19 Response            | 3.290        | 2.801 - 3.865        |
| Sub-total                        |              |                      |
| D+L pooled RR                    | <b>1.631</b> | <b>1.030 - 2.581</b> |
| <b>ICU</b>                       |              |                      |
| Cheng, Y. et al.                 | 1.287        | 0.734 - 2.256        |
| Duanmu Y. et al.                 | 3.133        | 1.577 - 6.225        |

|                           |              |              |              |
|---------------------------|--------------|--------------|--------------|
| Kalligeros M. et al.      | 0.836        | 0.370        | 1.891        |
| CDC COVID-19 Response     | 4.556        | 3.569        | 5.816        |
| Sub-total                 |              |              |              |
| D+L pooled RR             | 2.057        | 0.872        | 4.851        |
| <b>Death</b>              |              |              |              |
| Cheng, Y. et al.          | 2.557        | 1.816        | 3.600        |
| Wang Dawei et al.         | 1.926        | 0.368        | 10.074       |
| Nikpouraghdam M. et       | 2.081        | 0.735        | 5.887        |
| Sub-total                 |              |              |              |
| D+L pooled RR             | <b>2.481</b> | <b>1.804</b> | <b>3.414</b> |
| <b>Composite Endpoint</b> |              |              |              |
| Yu X. et al.              | 2.119        | 0.899        | 4.992        |
| Sub-total                 |              |              |              |
| D+L pooled RR             | 2.119        | 0.899        | 4.992        |
| <b>Overall</b>            |              |              |              |
| D+L pooled RR             | <b>1.885</b> | <b>1.368</b> | <b>2.596</b> |

Diabetes

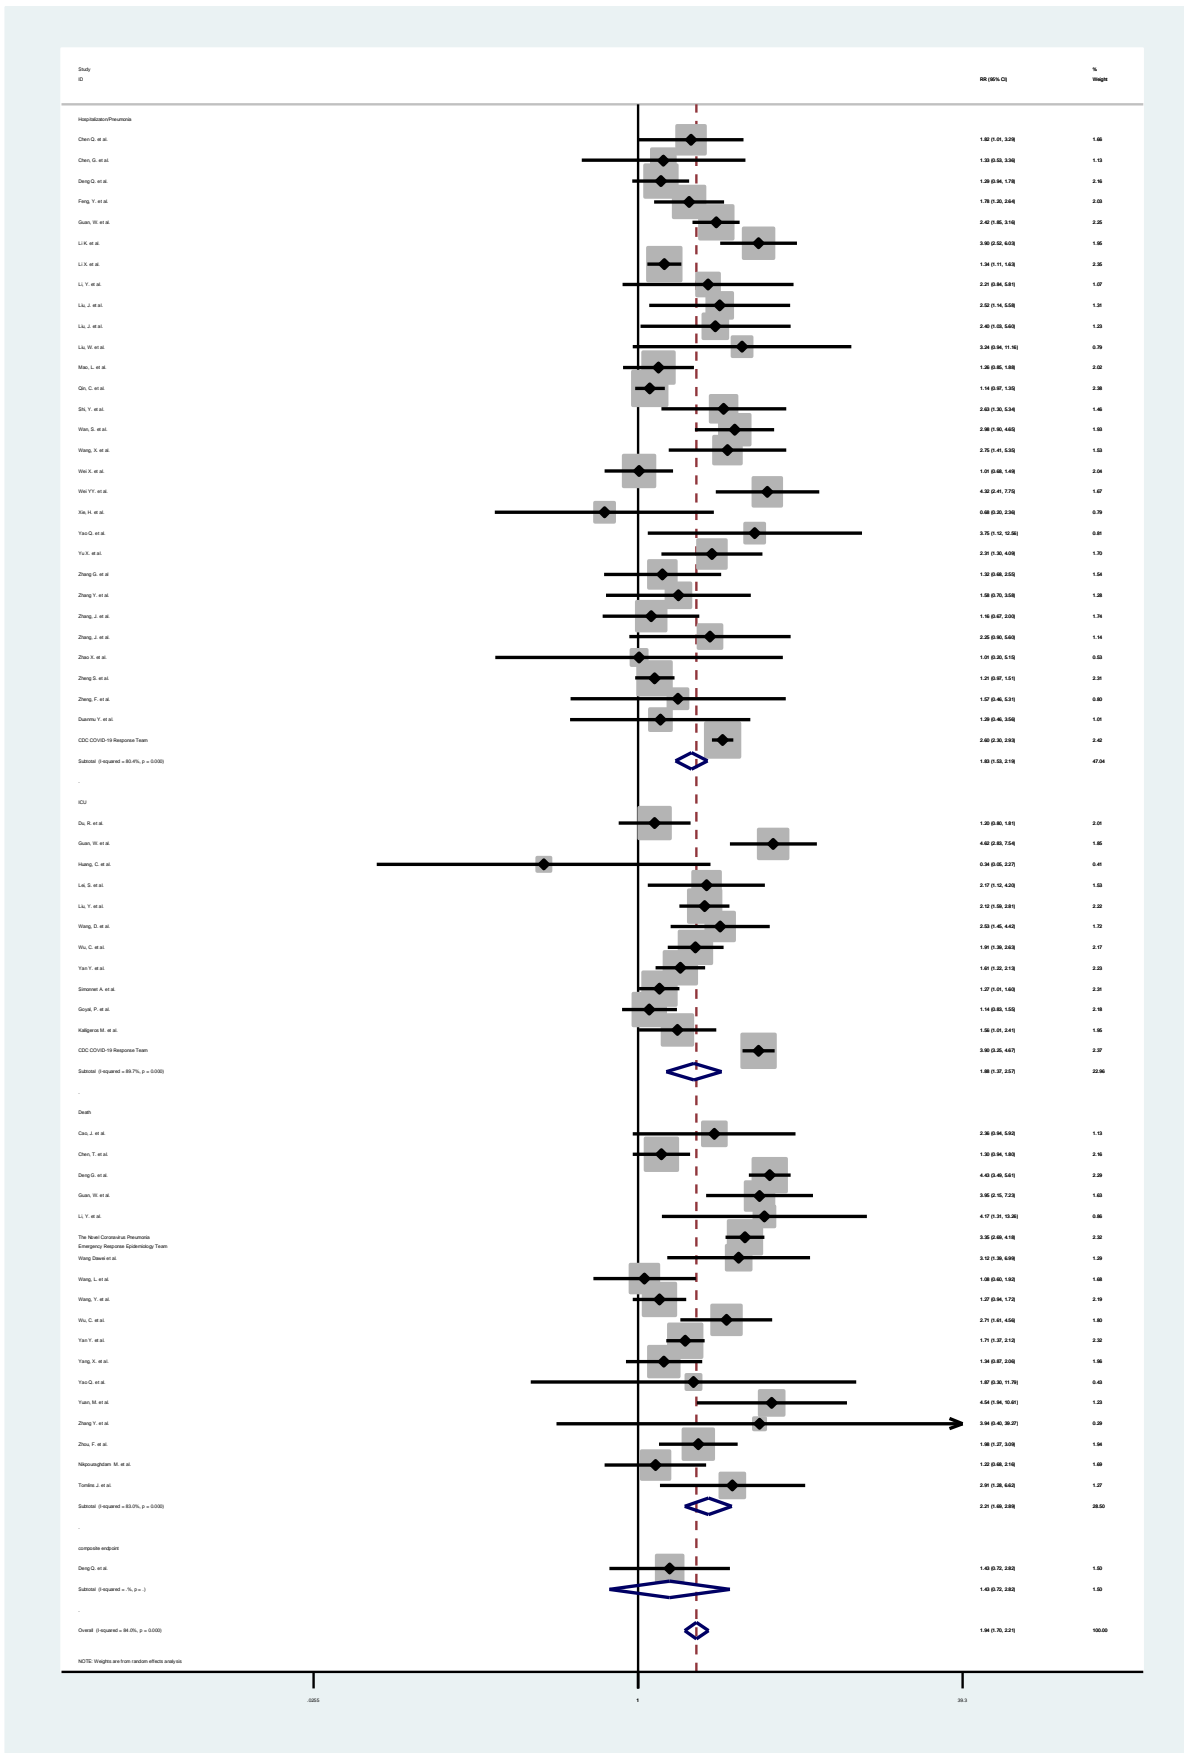

| <b>Hospitalisation/Pneumonia</b> |              |              |              |
|----------------------------------|--------------|--------------|--------------|
| Chen Q. et al.                   | 1.819        | 1.005        | 3.292        |
| Chen, G. et al.                  | 1.333        | 0.529        | 3.359        |
| Deng Q. et al.                   | 1.293        | 0.937        | 1.783        |
| Feng, Y. et al.                  | 1.780        | 1.202        | 2.638        |
| Guan, W. et al.                  | 2.418        | 1.851        | 3.160        |
| Li K. et al.                     | 3.902        | 2.524        | 6.032        |
| Li X. et al.                     | 1.343        | 1.107        | 1.627        |
| Li, Y. et al.                    | 2.206        | 0.837        | 5.812        |
| Liu, J. et al.                   | 2.519        | 1.136        | 5.584        |
| Liu, J. et al.                   | 2.400        | 1.029        | 5.600        |
| Liu, W. et al.                   | 3.244        | 0.943        | 11.162       |
| Mao, L. et al.                   | 1.260        | 0.845        | 1.880        |
| Qin, C. et al.                   | 1.143        | 0.969        | 1.350        |
| Shi, Y. et al.                   | 2.632        | 1.298        | 5.336        |
| Wan, S. et al.                   | 2.976        | 1.904        | 4.651        |
| Wang, X. et al.                  | 2.746        | 1.410        | 5.346        |
| Wei X. et al.                    | 1.009        | 0.684        | 1.488        |
| Wei YY. et al.                   | 4.316        | 2.405        | 7.746        |
| Xie, H. et al.                   | 0.683        | 0.198        | 2.356        |
| Yao Q. et al.                    | 3.745        | 1.117        | 12.562       |
| Yu X. et al.                     | 2.306        | 1.301        | 4.085        |
| Zhang G. et al                   | 1.319        | 0.682        | 2.551        |
| Zhang Y. et al.                  | 1.578        | 0.695        | 3.580        |
| Zhang, J. et al.                 | 1.158        | 0.670        | 2.002        |
| Zhang, J. et al.                 | 2.250        | 0.904        | 5.603        |
| Zhao X. et al.                   | 1.011        | 0.199        | 5.151        |
| Zheng S. et al.                  | 1.207        | 0.966        | 1.509        |
| Zheng, F. et al.                 | 1.571        | 0.465        | 5.314        |
| Duanmu Y. et al.                 | 1.286        | 0.464        | 3.559        |
| CDC COVID-19 Respons             | 2.598        | 2.301        | 2.933        |
| Sub-total                        |              |              |              |
| D+L pooled RR                    | <b>1.829</b> | <b>1.526</b> | <b>2.192</b> |
| <b>ICU</b>                       |              |              |              |
| Du, R. et al.                    | 1.203        | 0.801        | 1.808        |
| Guan, W. et al.                  | 4.617        | 2.827        | 7.540        |
| Huang, C. et al.                 | 0.344        | 0.052        | 2.271        |
| Lei, S. et al.                   | 2.167        | 1.117        | 4.203        |
| Liu, Y. et al.                   | 2.117        | 1.593        | 2.814        |
| Wang, D. et al.                  | 2.531        | 1.448        | 4.424        |
| Wu, C. et al.                    | 1.914        | 1.394        | 2.629        |
| Yan Y. et al.                    | 1.611        | 1.220        | 2.128        |
| Simonnet A. et al.               | 1.272        | 1.013        | 1.597        |
| Goyal, P. et al.                 | 1.137        | 0.835        | 1.550        |
| Kalligeros M. et al.             | 1.562        | 1.010        | 2.414        |
| CDC COVID-19 Respons             | 3.896        | 3.250        | 4.671        |
| Sub-total                        |              |              |              |
| D+L pooled RR                    | <b>1.881</b> | <b>1.375</b> | <b>2.574</b> |
| <b>Death</b>                     |              |              |              |
| Cao, J. et al.                   | 2.364        | 0.944        | 5.921        |

|                           |              |              |              |
|---------------------------|--------------|--------------|--------------|
| Chen, T. et al.           | 1.302        | 0.943        | 1.800        |
| Deng G. et al.            | 4.427        | 3.493        | 5.610        |
| Guan, W. et al.           | 3.946        | 2.153        | 7.233        |
| Li, Y. et al.             | 4.167        | 1.309        | 13.261       |
| The Novel Coronaviru      | 3.354        | 2.691        | 4.181        |
| Wang Dawei et al.         | 3.117        | 1.389        | 6.995        |
| Wang, L. et al.           | 1.075        | 0.602        | 1.919        |
| Wang, Y. et al.           | 1.274        | 0.941        | 1.725        |
| Wu, C. et al.             | 2.712        | 1.614        | 4.558        |
| Yan Y. et al.             | 1.707        | 1.373        | 2.124        |
| Yang, X. et al.           | 1.338        | 0.869        | 2.060        |
| Yao Q. et al.             | 1.873        | 0.297        | 11.790       |
| Yuan, M. et al.           | 4.540        | 1.942        | 10.614       |
| Zhang Y. et al.           | 3.944        | 0.396        | 39.268       |
| Zhou, F. et al.           | 1.978        | 1.267        | 3.088        |
| Nikpouraghdam M. et       | 1.217        | 0.685        | 2.163        |
| Tomlins J. et al.         | 2.911        | 1.281        | 6.617        |
| Sub-total                 |              |              |              |
| D+L pooled RR             | <b>2.213</b> | <b>1.693</b> | <b>2.893</b> |
| <b>Composite Endpoint</b> |              |              |              |
| Deng Q. et al.            | 1.428        | 0.722        | 2.824        |
| Sub-total                 |              |              |              |
| D+L pooled RR             | 1.428        | 0.722        | 2.824        |
| <b>Overall</b>            |              |              |              |
| D+L pooled RR             | <b>1.938</b> | <b>1.697</b> | <b>2.213</b> |

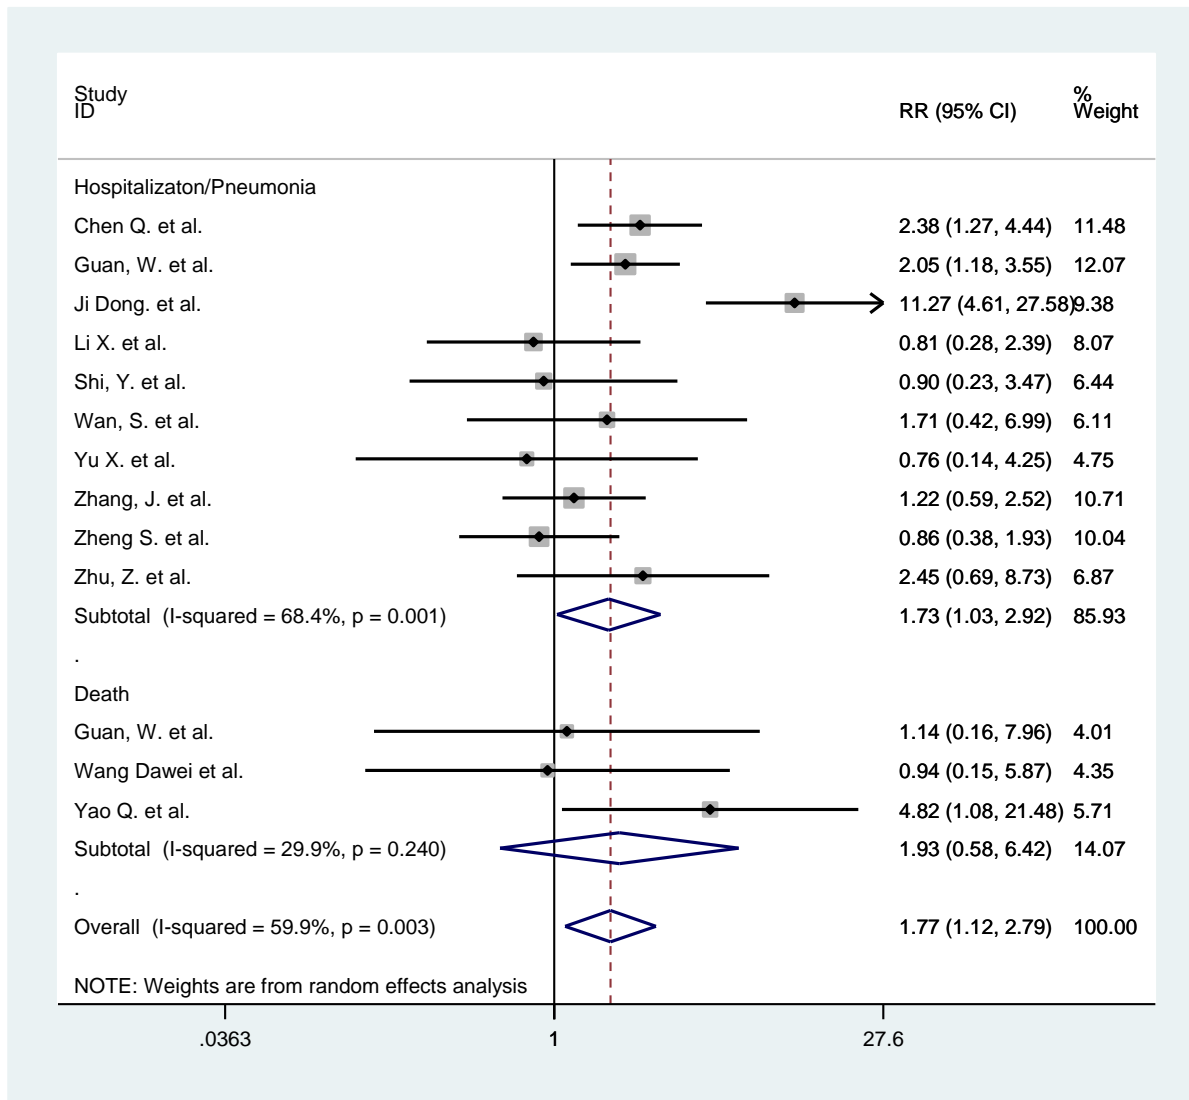

| Study                            | RR           | [95% Conf. Interval] |              |
|----------------------------------|--------------|----------------------|--------------|
| <b>Hospitalisation/Pneumonia</b> |              |                      |              |
| Chen Q. et al.                   | 2.376        | 1.271                | 4.440        |
| Guan, W. et al.                  | 2.049        | 1.182                | 3.553        |
| Ji Dong. et al.                  | 11.274       | 4.609                | 27.578       |
| Li X. et al.                     | 0.813        | 0.277                | 2.388        |
| Shi, Y. et al.                   | 0.899        | 0.233                | 3.466        |
| Wan, S. et al.                   | 1.705        | 0.416                | 6.990        |
| Yu X. et al.                     | 0.759        | 0.135                | 4.251        |
| Zhang, J. et al.                 | 1.222        | 0.593                | 2.518        |
| Zheng S. et al.                  | 0.861        | 0.384                | 1.931        |
| Zhu, Z. et al.                   | 2.449        | 0.687                | 8.725        |
| Sub-total                        |              |                      |              |
| D+L pooled RR                    | <b>1.734</b> | <b>1.029</b>         | <b>2.921</b> |
| <b>Death</b>                     |              |                      |              |
| Guan, W. et al.                  | 1.138        | 0.163                | 7.956        |
| Wang Dawei et al.                | 0.935        | 0.149                | 5.874        |

|                |              |              |              |
|----------------|--------------|--------------|--------------|
| Yao Q. et al.  | 4.818        | 1.081        | 21.476       |
| Sub-total      |              |              |              |
| D+L pooled RR  | 1.930        | 0.580        | 6.418        |
| <b>Overall</b> |              |              |              |
| D+L pooled RR  | <b>1.767</b> | <b>1.118</b> | <b>2.791</b> |

### Diseases of the digestive system

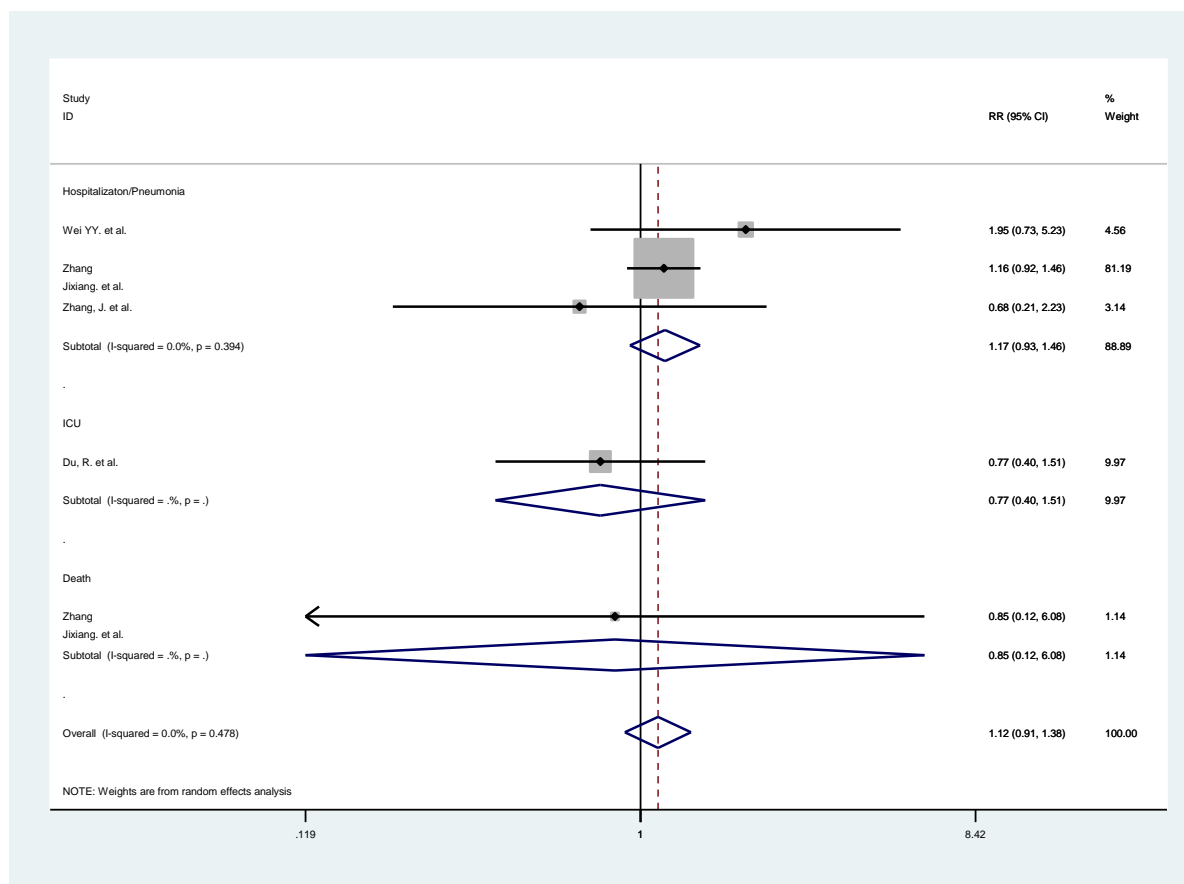

| Study                            | RR          | [95% Conf. Interval] |
|----------------------------------|-------------|----------------------|
| <b>Hospitalisation/Pneumonia</b> |             |                      |
| Wei YY. et al.                   | 1.951 0.728 | 5.227                |
| Zhang Jixiang. et al             | 1.159 0.918 | 1.464                |
| Zhang, J. et al.                 | 0.679 0.207 | 2.226                |
| Sub-total                        |             |                      |
| D+L pooled RR                    | 1.168 0.934 | 1.460                |
| <b>ICU</b>                       |             |                      |
| Du, R. et al.                    | 0.775 0.398 | 1.509                |
| Sub-total                        |             |                      |
| D+L pooled RR                    | 0.775 0.398 | 1.509                |
| <b>Death</b>                     |             |                      |
| Zhang Jixiang. et al             | 0.849 0.119 | 6.077                |
| Sub-total                        |             |                      |
| D+L pooled RR                    | 0.849 0.119 | 6.077                |
| <b>Overall</b>                   |             |                      |
| D+L pooled RR                    | 1.117 0.905 | 1.379                |



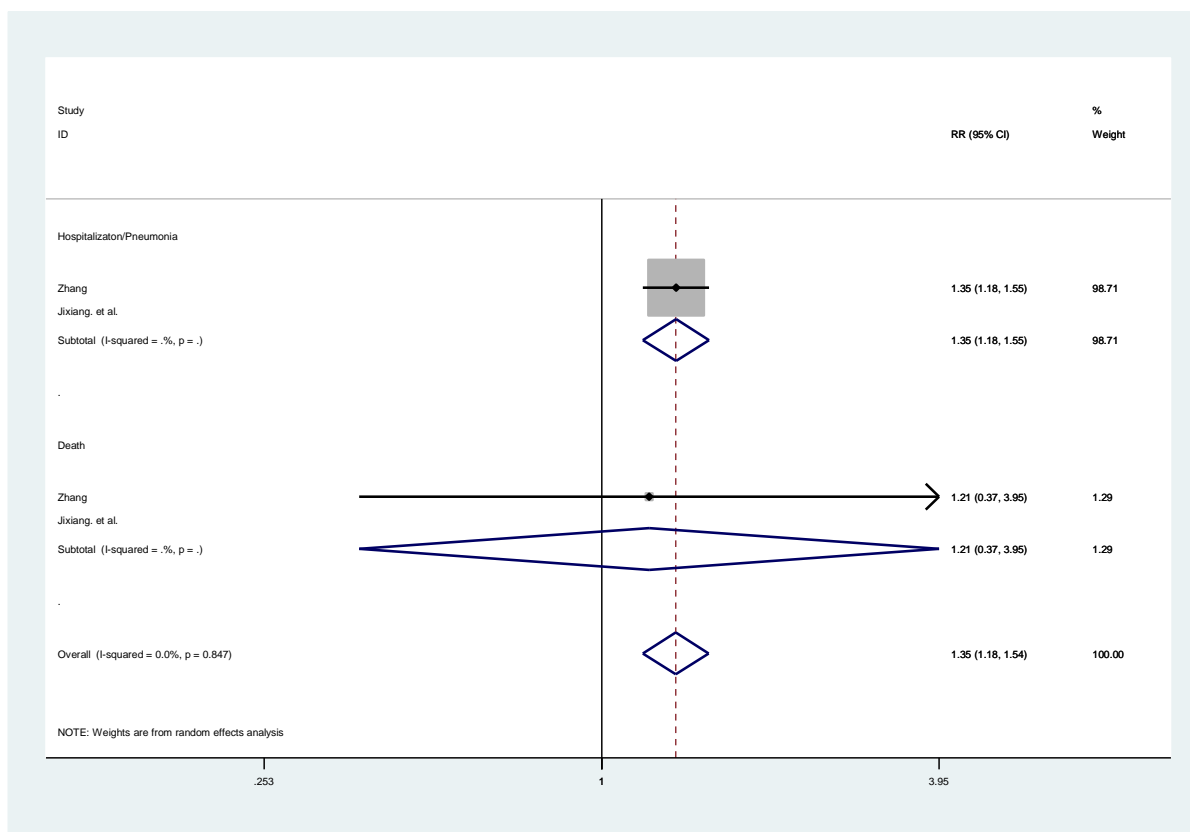

| Study                            | RR           | [95% Conf. Interval] |
|----------------------------------|--------------|----------------------|
| <b>Hospitalisation/Pneumonia</b> |              |                      |
| Zhang Jixiang. et al             | 1.353        | 1.182 1.548          |
| Sub-total                        |              |                      |
| D+L pooled RR                    | <b>1.353</b> | <b>1.182 1.548</b>   |
| <b>Death</b>                     |              |                      |
| Zhang Jixiang. et al             | 1.213        | 0.373 3.946          |
| Sub-total                        |              |                      |
| D+L pooled RR                    | 1.213        | 0.373 3.946          |
| <b>Overall</b>                   |              |                      |
| D+L pooled RR                    | <b>1.351</b> | <b>1.182 1.545</b>   |

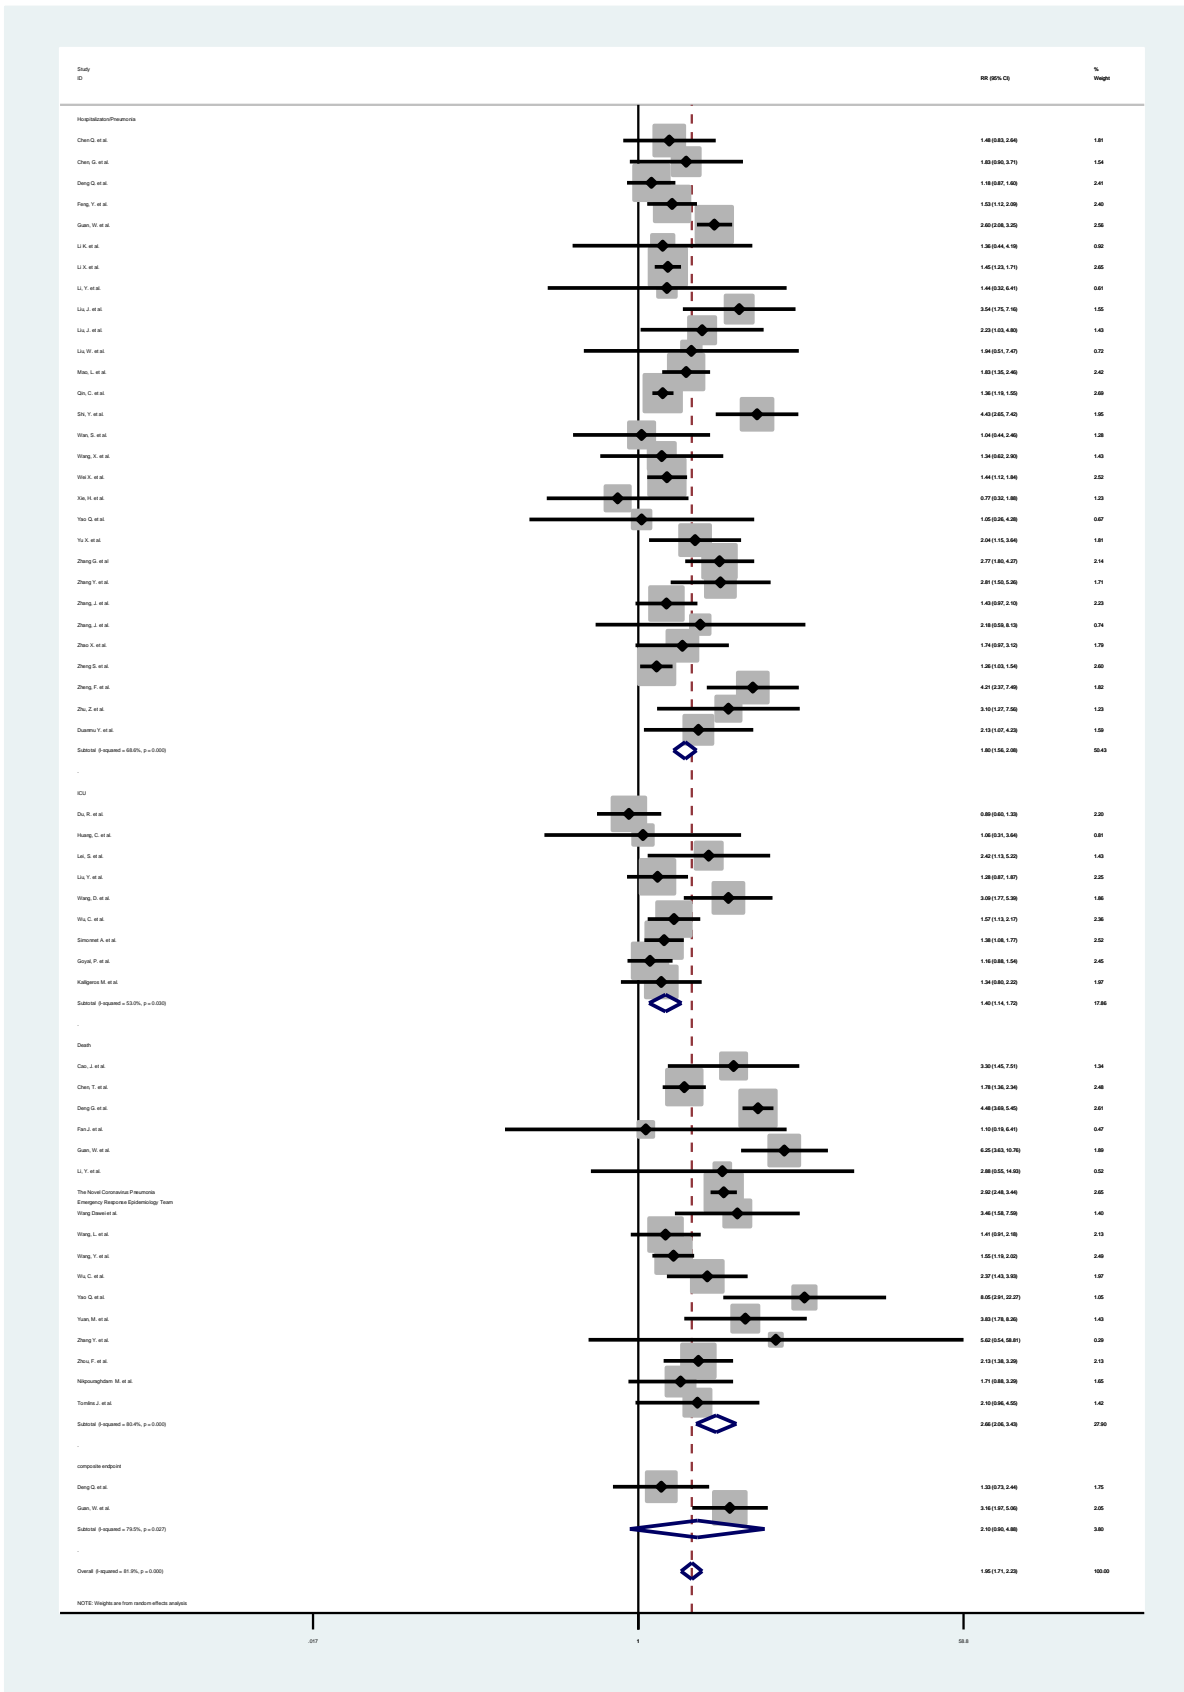

Study RR [95% Conf. Interval]  
Hospitalisation/Pneumonia

|                      |              |              |              |
|----------------------|--------------|--------------|--------------|
| Chen Q. et al.       | 1.480        | 0.830        | 2.638        |
| Chen, G. et al.      | 1.829        | 0.901        | 3.711        |
| Deng Q. et al.       | 1.178        | 0.870        | 1.596        |
| Feng, Y. et al.      | 1.530        | 1.120        | 2.089        |
| Guan, W. et al.      | 2.603        | 2.084        | 3.253        |
| Li K. et al.         | 1.357        | 0.440        | 4.187        |
| Li X. et al.         | 1.450        | 1.231        | 1.710        |
| Li, Y. et al.        | 1.438        | 0.322        | 6.408        |
| Liu, J. et al.       | 3.542        | 1.752        | 7.159        |
| Liu, J. et al.       | 2.227        | 1.033        | 4.804        |
| Liu, W. et al.       | 1.944        | 0.506        | 7.473        |
| Mao, L. et al.       | 1.826        | 1.354        | 2.464        |
| Qin, C. et al.       | 1.362        | 1.195        | 1.553        |
| Shi, Y. et al.       | 4.430        | 2.645        | 7.421        |
| Wan, S. et al.       | 1.043        | 0.441        | 2.465        |
| Wang, X. et al.      | 1.340        | 0.620        | 2.896        |
| Wei X. et al.        | 1.437        | 1.120        | 1.842        |
| Xie, H. et al.       | 0.774        | 0.319        | 1.879        |
| Yao Q. et al.        | 1.045        | 0.255        | 4.282        |
| Yu X. et al.         | 2.043        | 1.147        | 3.639        |
| Zhang G. et al       | 2.773        | 1.801        | 4.268        |
| Zhang Y. et al.      | 2.810        | 1.502        | 5.256        |
| Zhang, J. et al.     | 1.426        | 0.967        | 2.102        |
| Zhang, J. et al.     | 2.182        | 0.585        | 8.134        |
| Zhao X. et al.       | 1.738        | 0.967        | 3.124        |
| Zheng S. et al.      | 1.256        | 1.027        | 1.537        |
| Zheng, F. et al.     | 4.212        | 2.369        | 7.490        |
| Zhu, Z. et al.       | 3.097        | 1.269        | 7.559        |
| Duanmu Y. et al.     | 2.132        | 1.073        | 4.233        |
| Sub-total            |              |              |              |
| D+L pooled RR        | <b>1.799</b> | <b>1.557</b> | <b>2.078</b> |
| <b>ICU</b>           |              |              |              |
| Du, R. et al.        | 0.892        | 0.598        | 1.332        |
| Huang, C. et al.     | 1.061        | 0.309        | 3.639        |
| Lei, S. et al.       | 2.423        | 1.125        | 5.219        |
| Liu, Y. et al.       | 1.277        | 0.872        | 1.871        |
| Wang, D. et al.      | 3.093        | 1.774        | 5.394        |
| Wu, C. et al.        | 1.566        | 1.128        | 2.175        |
| Simonnet A. et al.   | 1.384        | 1.084        | 1.767        |
| Goyal, P. et al.     | 1.161        | 0.875        | 1.540        |
| Kalligeros M. et al. | 1.337        | 0.805        | 2.220        |
| Sub-total            |              |              |              |
| D+L pooled RR        | <b>1.404</b> | <b>1.144</b> | <b>1.723</b> |
| <b>Death</b>         |              |              |              |
| Cao, J. et al.       | 3.304        | 1.452        | 7.514        |
| Chen, T. et al.      | 1.781        | 1.358        | 2.337        |
| Deng G. et al.       | 4.482        | 3.689        | 5.445        |
| Fan J. et al.        | 1.100        | 0.189        | 6.413        |
| Guan, W. et al.      | 6.250        | 3.632        | 10.755       |
| Li, Y. et al.        | 2.875        | 0.554        | 14.932       |

|                           |              |              |              |
|---------------------------|--------------|--------------|--------------|
| The Novel Coronaviru      | 2.923        | 2.482        | 3.443        |
| Wang Dawei et al.         | 3.462        | 1.579        | 7.587        |
| Wang, L. et al.           | 1.412        | 0.914        | 2.183        |
| Wang, Y. et al.           | 1.552        | 1.192        | 2.021        |
| Wu, C. et al.             | 2.374        | 1.432        | 3.933        |
| Yao Q. et al.             | 8.050        | 2.910        | 22.268       |
| Yuan, M. et al.           | 3.833        | 1.779        | 8.262        |
| Zhang Y. et al.           | 5.619        | 0.537        | 58.814       |
| Zhou, F. et al.           | 2.129        | 1.377        | 3.292        |
| Nikpouraghdam M. et       | 1.705        | 0.885        | 3.286        |
| Tomlins J. et al.         | 2.095        | 0.964        | 4.553        |
| Sub-total                 |              |              |              |
| D+L pooled RR             | <b>2.659</b> | <b>2.061</b> | <b>3.430</b> |
| <b>Composite Endpoint</b> |              |              |              |
| Deng Q. et al.            | 1.333        | 0.729        | 2.440        |
| Guan, W. et al.           | 3.159        | 1.972        | 5.061        |
| Sub-total                 |              |              |              |
| D+L pooled RR             | 2.097        | 0.901        | 4.879        |
| <b>Overall</b>            |              |              |              |
| D+L pooled RR             | <b>1.952</b> | <b>1.710</b> | <b>2.229</b> |

### Immunocompromised condition

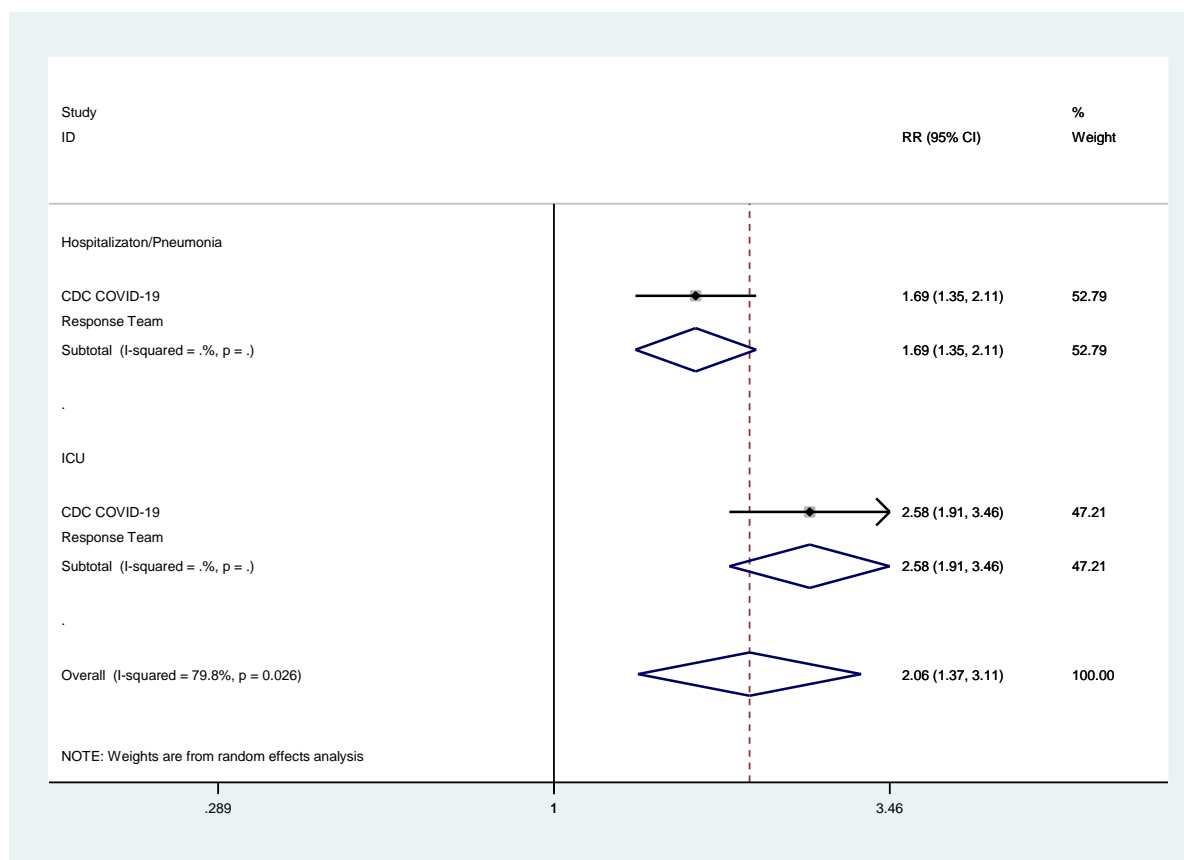

| Study                            | RR    | [95% Conf. Interval] |
|----------------------------------|-------|----------------------|
| <b>Hospitalisation/Pneumonia</b> |       |                      |
| CDC COVID-19 Response            | 1.690 | 1.352 2.113          |
| Sub-total                        |       |                      |

|                       |              |              |              |
|-----------------------|--------------|--------------|--------------|
| D+L pooled RR         | <b>1.690</b> | <b>1.352</b> | <b>2.113</b> |
| <b>ICU</b>            |              |              |              |
| CDC COVID-19 Response | 2.575        | 1.915        | 3.463        |
| <b>Sub-total</b>      |              |              |              |
| D+L pooled RR         | <b>2.575</b> | <b>1.915</b> | <b>3.463</b> |
| <b>Overall</b>        |              |              |              |
| D+L pooled RR         | <b>2.062</b> | <b>1.365</b> | <b>3.114</b> |

Mycobacterial diseases

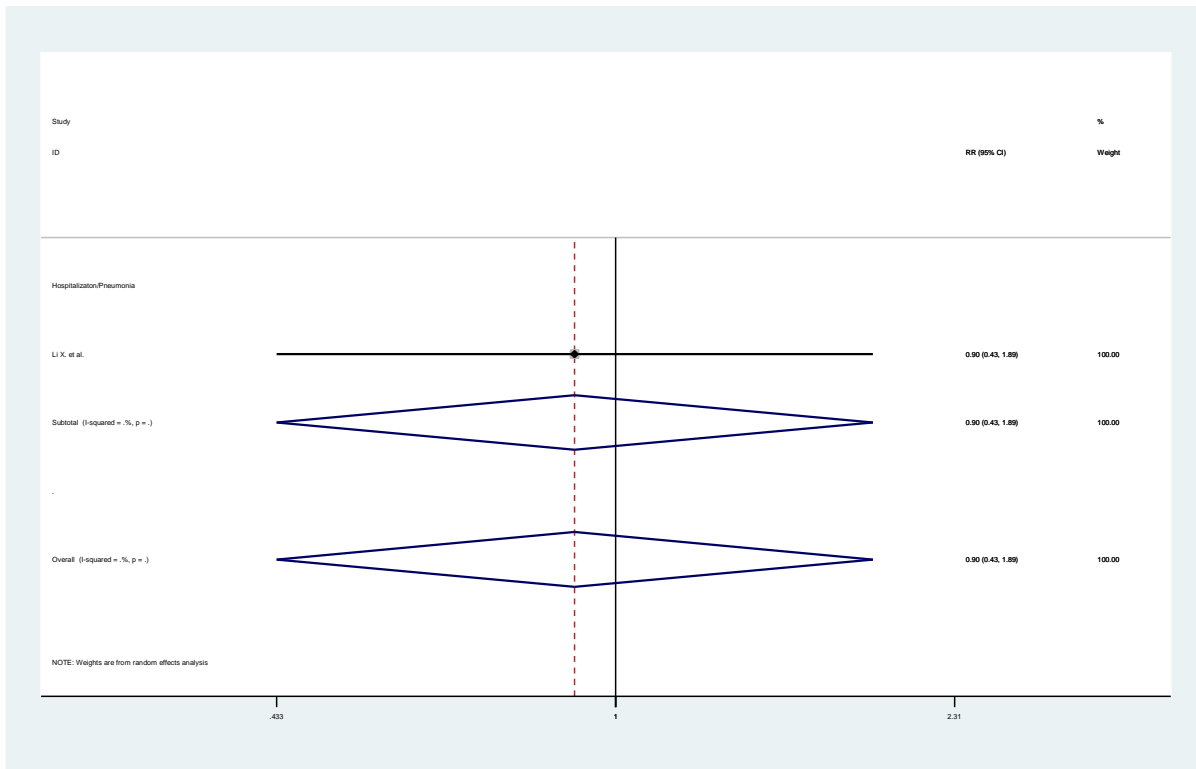

| Study                            | RR          | [95% Conf. Interval] |
|----------------------------------|-------------|----------------------|
| <b>Hospitalisation/Pneumonia</b> |             |                      |
| Li X. et al.                     | 0.904 0.433 | 1.886                |
| <b>Sub-total</b>                 |             |                      |
| D+L pooled RR                    | 0.904 0.433 | 1.886                |
| <b>Overall</b>                   |             |                      |
| D+L pooled RR                    | 0.904 0.433 | 1.886                |

Myocardial infarction

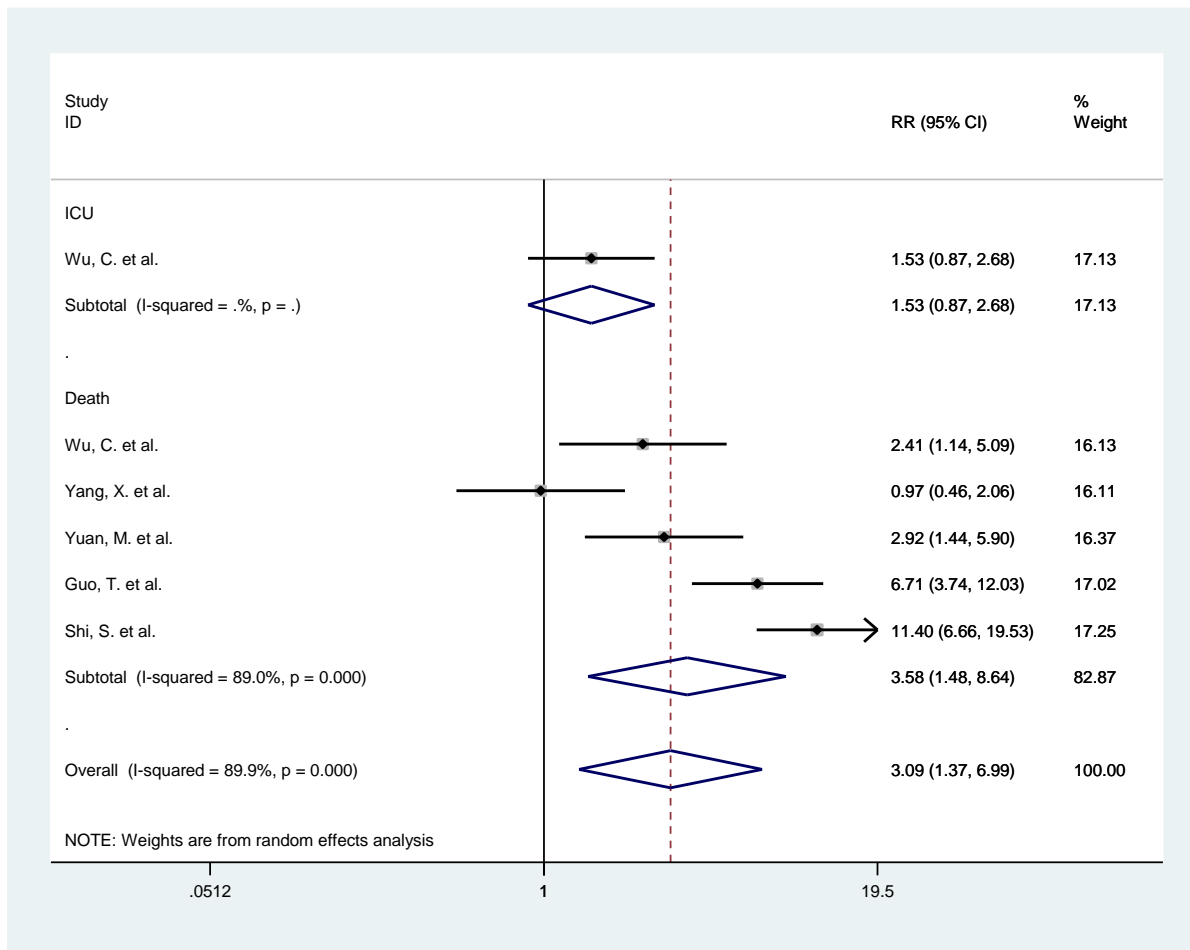

| Study           | RR    | [95% Conf. Interval] |
|-----------------|-------|----------------------|
| <b>ICU</b>      |       |                      |
| Wu, C. et al.   | 1.527 | 0.870 2.681          |
| Sub-total       |       |                      |
| D+L pooled RR   | 1.527 | 0.870 2.681          |
| <b>Death</b>    |       |                      |
| Wu, C. et al.   | 2.412 | 1.144 5.086          |
| Yang, X. et al. | 0.972 | 0.459 2.059          |
| Yuan, M. et al. | 2.917 | 1.442 5.897          |
| Guo, T. et al.  | 6.707 | 3.738 12.033         |
| Shi, S. et al.  | 11.40 | 6.661 19.528         |
|                 | 5     |                      |
| Sub-total       |       |                      |
| D+L pooled RR   | 3.581 | 1.484 8.640          |
| <b>Overall</b>  |       |                      |
| D+L pooled RR   | 3.093 | 1.369 6.988          |

Other diseases or unspecified

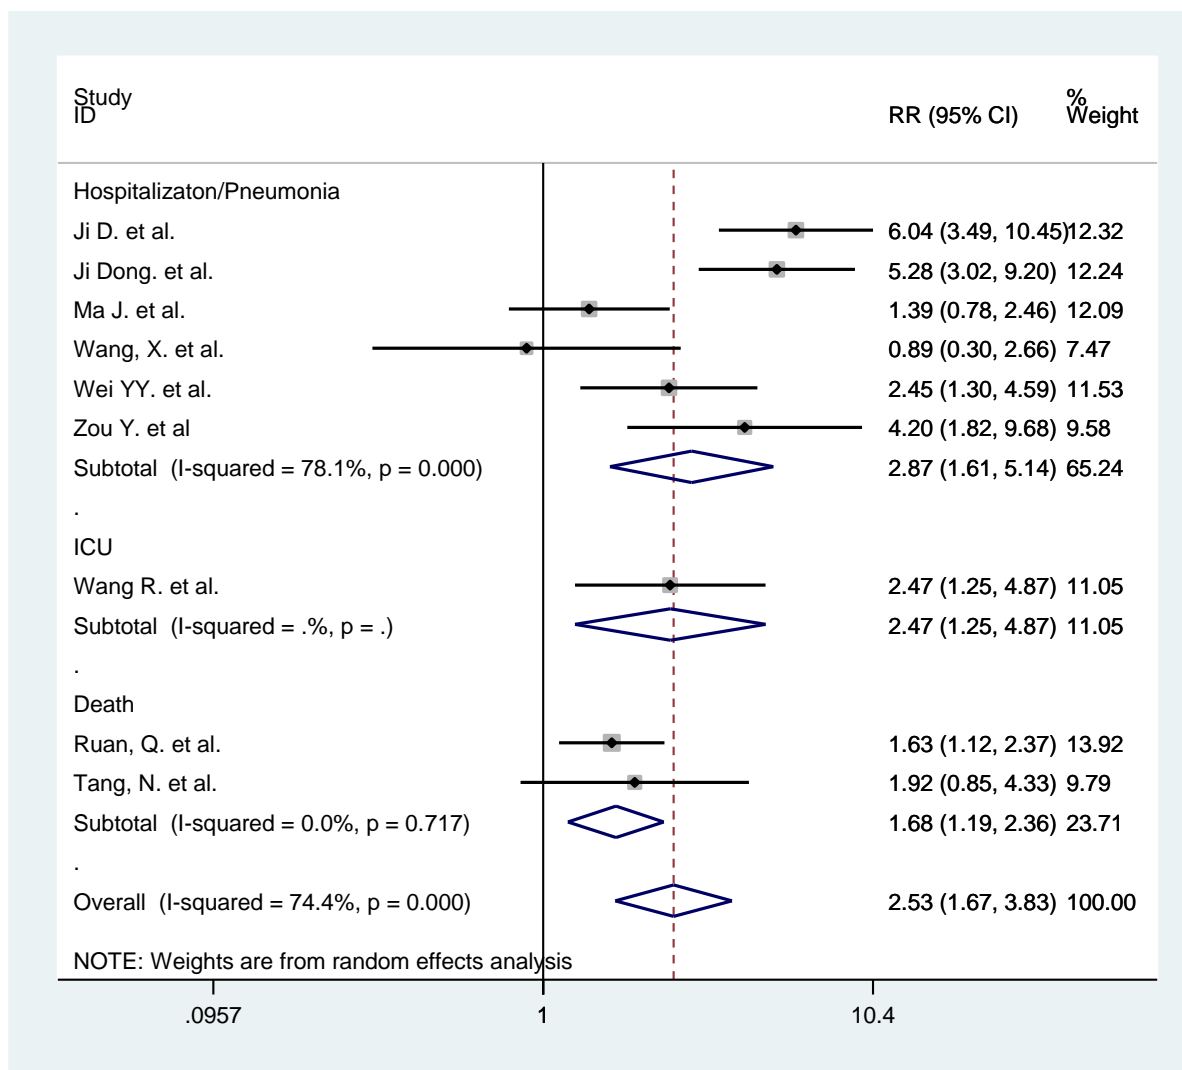

| Study                            | RR           | [95% Conf. Interval] |
|----------------------------------|--------------|----------------------|
| <b>Hospitalisation/Pneumonia</b> |              |                      |
| Ji D. et al.                     | 6.037        | 3.488 - 10.448       |
| Ji Dong. et al.                  | 5.277        | 3.025 - 9.205        |
| Ma J. et al.                     | 1.389        | 0.784 - 2.459        |
| Wang, X. et al.                  | 0.890        | 0.297 - 2.664        |
| Wei YY. et al.                   | 2.446        | 1.304 - 4.589        |
| Zou Y. et al.                    | 4.197        | 1.820 - 9.676        |
| Sub-total                        |              |                      |
| D+L pooled RR                    | <b>2.875</b> | <b>1.607 - 5.143</b> |
| <b>ICU</b>                       |              |                      |
| Wang R. et al.                   | 2.471        | 1.253 - 4.870        |
| Sub-total                        |              |                      |
| D+L pooled RR                    | <b>2.471</b> | <b>1.253 - 4.870</b> |
| <b>Death</b>                     |              |                      |
| Ruan, Q. et al.                  | 1.631        | 1.121 - 2.372        |
| Tang, N. et al.                  | 1.920        | 0.852 - 4.327        |
| Sub-total                        |              |                      |
| D+L pooled RR                    | <b>1.678</b> | <b>1.194 - 2.358</b> |

|                |              |              |              |
|----------------|--------------|--------------|--------------|
| <b>Overall</b> |              |              |              |
| D+L pooled RR  | <b>2.531</b> | <b>1.673</b> | <b>3.829</b> |

Other respiratory diseases

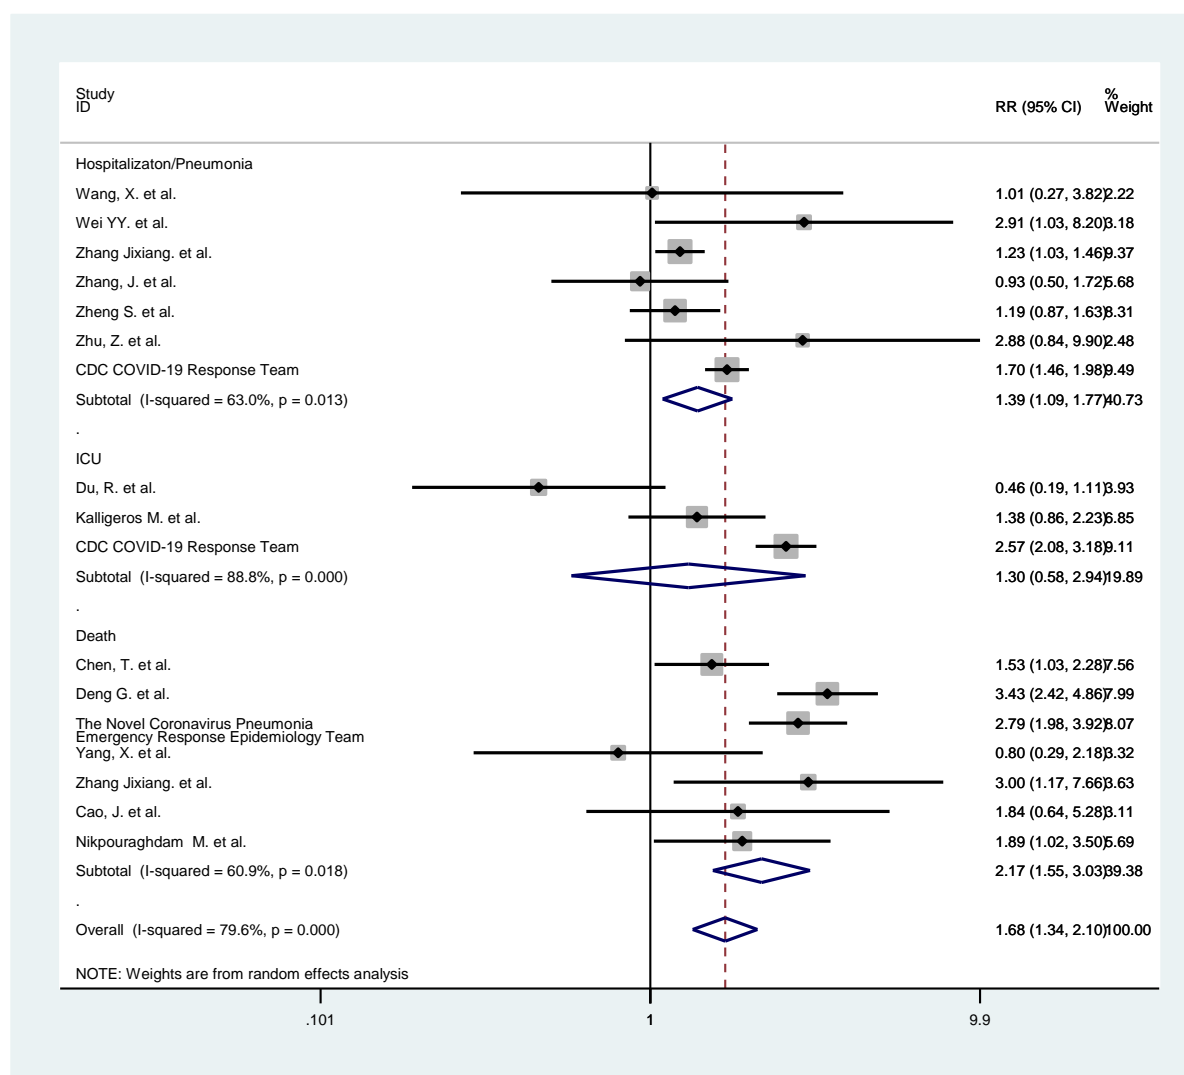

| Study                            | RR           | [95% Conf. Interval] |
|----------------------------------|--------------|----------------------|
| <b>Hospitalisation/Pneumonia</b> |              |                      |
| Wang, X. et al.                  | 1.012        | 0.268 3.820          |
| Wei YY. et al.                   | 2.911        | 1.033 8.205          |
| Zhang Jixiang. et al             | 1.229        | 1.034 1.461          |
| Zhang, J. et al.                 | 0.930        | 0.503 1.722          |
| Zheng S. et al.                  | 1.187        | 0.867 1.625          |
| Zhu, Z. et al.                   | 2.881        | 0.839 9.897          |
| CDC COVID-19 Response            | 1.703        | 1.463 1.983          |
| Sub-total                        |              |                      |
| D+L pooled RR                    | <b>1.389</b> | <b>1.091 1.768</b>   |
| <b>ICU</b>                       |              |                      |
| Du, R. et al.                    | 0.461        | 0.191 1.110          |
| Kalligeros M. et al.             | 1.383        | 0.859 2.228          |
| CDC COVID-19 Respons             | 2.568        | 2.077 3.175          |
| Sub-total                        |              |                      |



|                      |              |              |              |
|----------------------|--------------|--------------|--------------|
| D+L pooled RR        | 1.304        | 0.578        | 2.940        |
| <b>Death</b>         |              |              |              |
| Chen, T. et al.      | 1.534        | 1.030        | 2.284        |
| Deng G. et al.       | 3.428        | 2.415        | 4.865        |
| The Novel Coronaviru | 2.791        | 1.984        | 3.925        |
| Yang, X. et al.      | 0.800        | 0.293        | 2.184        |
| Zhang Jixiang. et al | 3.000        | 1.175        | 7.660        |
| Cao, J. et al.       | 1.840        | 0.641        | 5.279        |
| Nikpouraghdam M. et  | 1.894        | 1.024        | 3.503        |
| Sub-total            |              |              |              |
| D+L pooled RR        | <b>2.166</b> | <b>1.546</b> | <b>3.035</b> |
| <b>Overall</b>       |              |              |              |
| D+L pooled RR        | <b>1.682</b> | <b>1.343</b> | <b>2.105</b> |

## DEMOGRAPHIC, OCCUPATIONAL OR LIFESTYLE FACTORS

### Healthcare workers

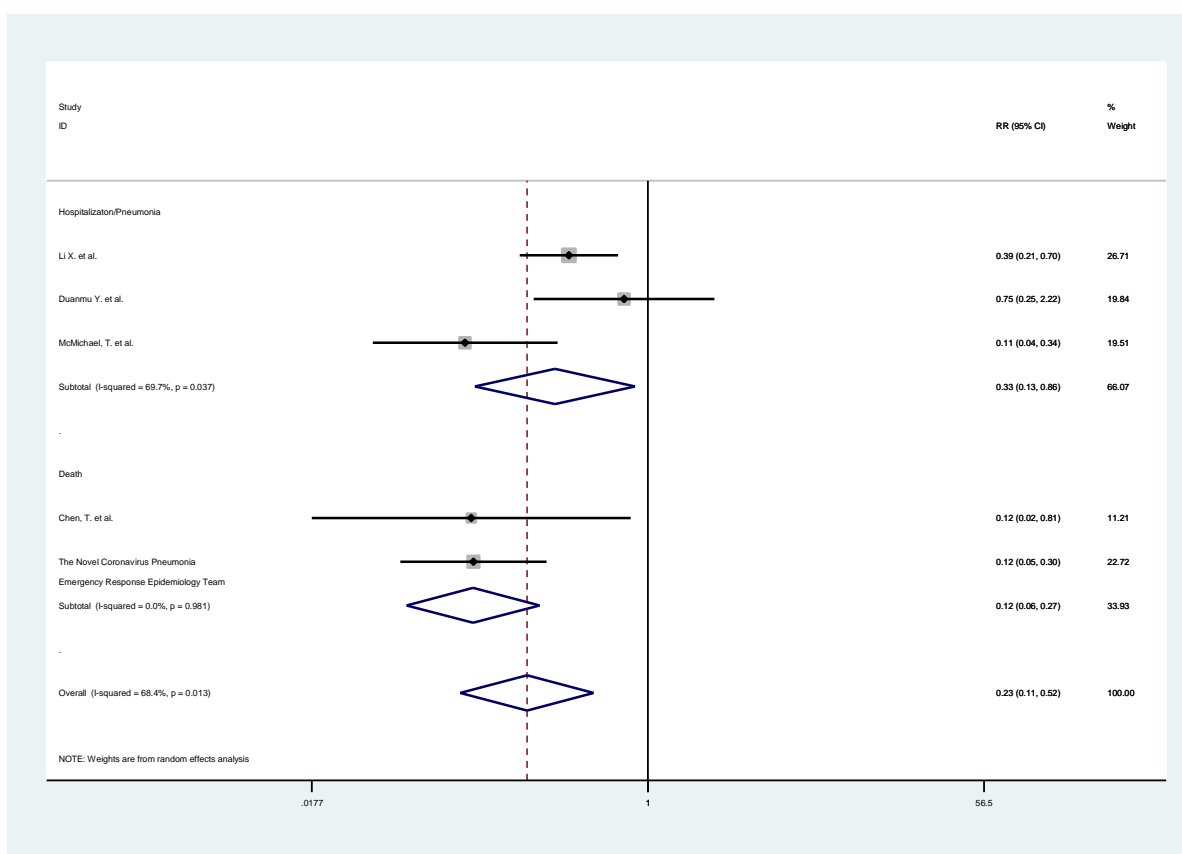

| Study                            | RR           | [95% Conf. Interval] |
|----------------------------------|--------------|----------------------|
| <b>Hospitalisation/Pneumonia</b> |              |                      |
| Li X. et al.                     | 0.388        | 0.215 0.700          |
| Duanmu Y. et al.                 | 0.750        | 0.253 2.220          |
| McMichael, T. et al.             | 0.111        | 0.037 0.338          |
| Sub-total                        |              |                      |
| D+L pooled RR                    | <b>0.327</b> | <b>0.125 0.855</b>   |
| <b>Death</b>                     |              |                      |
| Chen, T. et al.                  | 0.120        | 0.018 0.811          |

|                            |              |              |              |
|----------------------------|--------------|--------------|--------------|
| The Novel Coronavirus Team | 0.123        | 0.051        | 0.296        |
| Sub-total                  |              |              |              |
| D+L pooled RR              | <b>0.122</b> | <b>0.055</b> | <b>0.272</b> |
| <b>Overall</b>             |              |              |              |
| D+L pooled RR              | <b>0.234</b> | <b>0.105</b> | <b>0.521</b> |

*Male*

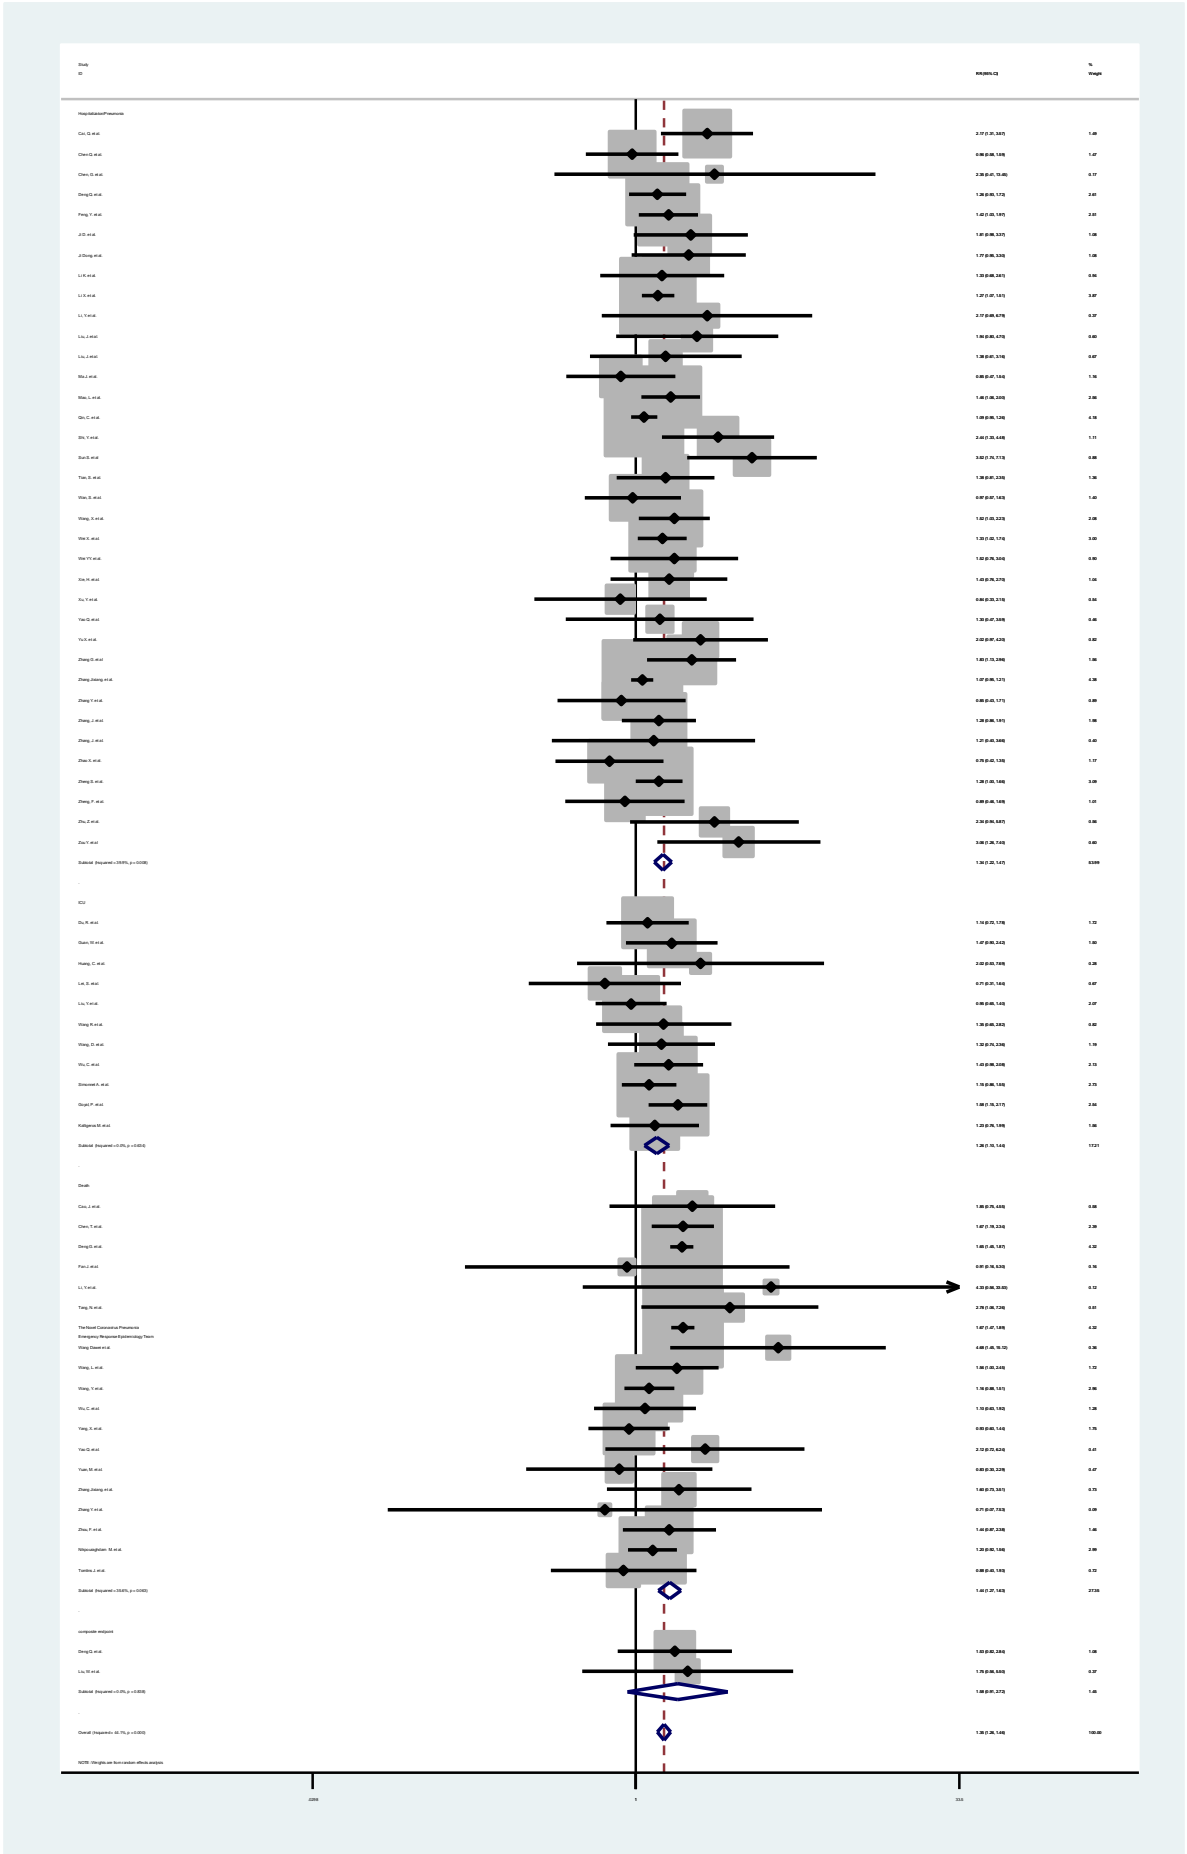

| Study                            | RR           | [95% Conf. Interval] |              |
|----------------------------------|--------------|----------------------|--------------|
| <b>Hospitalisation/Pneumonia</b> |              |                      |              |
| Cai, Q. et al.                   | 2.166        | 1.315                | 3.568        |
| Chen Q. et al.                   | 0.961        | 0.581                | 1.588        |
| Chen, G. et al.                  | 2.353        | 0.412                | 13.451       |
| Deng Q. et al.                   | 1.264        | 0.927                | 1.724        |
| Feng, Y. et al.                  | 1.425        | 1.032                | 1.967        |
| Ji D. et al.                     | 1.815        | 0.978                | 3.368        |
| Ji Dong. et al.                  | 1.772        | 0.953                | 3.296        |
| Li K. et al.                     | 1.330        | 0.678                | 2.609        |
| Li X. et al.                     | 1.272        | 1.069                | 1.513        |
| Li, Y. et al.                    | 2.167        | 0.691                | 6.791        |
| Liu, J. et al.                   | 1.944        | 0.804                | 4.701        |
| Liu, J. et al.                   | 1.382        | 0.606                | 3.155        |
| Ma J. et al.                     | 0.850        | 0.470                | 1.536        |
| Mao, L. et al.                   | 1.460        | 1.064                | 2.003        |
| Qin, C. et al.                   | 1.093        | 0.948                | 1.259        |
| Shi, Y. et al.                   | 2.438        | 1.326                | 4.481        |
| Sun S. et al                     | 3.524        | 1.741                | 7.131        |
| Tian, S. et al.                  | 1.382        | 0.813                | 2.348        |
| Wan, S. et al.                   | 0.967        | 0.575                | 1.627        |
| Wang, X. et al.                  | 1.519        | 1.034                | 2.232        |
| Wei X. et al.                    | 1.333        | 1.023                | 1.736        |
| Wei YY. et al.                   | 1.516        | 0.757                | 3.036        |
| Xie, H. et al.                   | 1.432        | 0.760                | 2.696        |
| Xu, Y. et al.                    | 0.845        | 0.332                | 2.151        |
| Yao Q. et al.                    | 1.296        | 0.467                | 3.594        |
| Yu X. et al.                     | 2.018        | 0.968                | 4.203        |
| Zhang G. et al                   | 1.831        | 1.131                | 2.965        |
| Zhang Jixiang. et al             | 1.071        | 0.950                | 1.207        |
| Zhang Y. et al.                  | 0.855        | 0.426                | 1.714        |
| Zhang, J. et al.                 | 1.283        | 0.860                | 1.914        |
| Zhang, J. et al.                 | 1.212        | 0.402                | 3.657        |
| Zhao X. et al.                   | 0.750        | 0.417                | 1.349        |
| Zheng S. et al.                  | 1.284        | 0.996                | 1.656        |
| Zheng, F. et al.                 | 0.886        | 0.464                | 1.693        |
| Zhu, Z. et al.                   | 2.343        | 0.935                | 5.869        |
| Zou Y. et al                     | 3.059        | 1.264                | 7.405        |
| Sub-total                        |              |                      |              |
| D+L pooled RR                    | <b>1.339</b> | <b>1.216</b>         | <b>1.474</b> |
| <b>ICU</b>                       |              |                      |              |
| Du, R. et al.                    | 1.135        | 0.725                | 1.778        |
| Guan, W. et al.                  | 1.474        | 0.898                | 2.419        |
| Huang, C. et al.                 | 2.017        | 0.529                | 7.693        |
| Lei, S. et al.                   | 0.714        | 0.312                | 1.635        |
| Liu, Y. et al.                   | 0.949        | 0.645                | 1.396        |
| Wang R. et al.                   | 1.352        | 0.648                | 2.823        |
| Wang, D. et al.                  | 1.320        | 0.739                | 2.358        |
| Wu, C. et al.                    | 1.426        | 0.979                | 2.077        |

|                           |              |              |              |
|---------------------------|--------------|--------------|--------------|
| Simonnet A. et al.        | 1.151        | 0.857        | 1.547        |
| Goyal, P. et al.          | 1.577        | 1.146        | 2.170        |
| Kalligeros M. et al.      | 1.228        | 0.759        | 1.986        |
| Sub-total                 |              |              |              |
| D+L pooled RR             | <b>1.257</b> | <b>1.098</b> | <b>1.437</b> |
| <b>Death</b>              |              |              |              |
| Cao, J. et al.            | 1.849        | 0.752        | 4.547        |
| Chen, T. et al.           | 1.666        | 1.188        | 2.338        |
| Deng G. et al.            | 1.646        | 1.451        | 1.867        |
| Fan J. et al.             | 0.909        | 0.156        | 5.300        |
| Li, Y. et al.             | 4.333        | 0.560        | 33.527       |
| Tang, N. et al.           | 2.776        | 1.061        | 7.258        |
| The Novel Coronaviru      | 1.666        | 1.468        | 1.890        |
| Wang Dawei et al.         | 4.678        | 1.447        | 15.122       |
| Wang, L. et al.           | 1.563        | 0.999        | 2.447        |
| Wang, Y. et al.           | 1.156        | 0.884        | 1.513        |
| Wu, C. et al.             | 1.103        | 0.634        | 1.917        |
| Yang, X. et al.           | 0.927        | 0.595        | 1.444        |
| Yao Q. et al.             | 2.116        | 0.718        | 6.238        |
| Yuan, M. et al.           | 0.833        | 0.303        | 2.293        |
| Zhang Jixiang. et al      | 1.598        | 0.729        | 3.506        |
| Zhang Y. et al.           | 0.712        | 0.067        | 7.533        |
| Zhou, F. et al.           | 1.437        | 0.867        | 2.382        |
| Nikpouraghdam M. et       | 1.197        | 0.918        | 1.561        |
| Tomlins J. et al.         | 0.875        | 0.397        | 1.931        |
| Sub-total                 |              |              |              |
| D+L pooled RR             | <b>1.443</b> | <b>1.274</b> | <b>1.634</b> |
| <b>Composite Endpoint</b> |              |              |              |
| Deng Q. et al.            | 1.528        | 0.821        | 2.842        |
| Liu, W. et al.            | 1.750        | 0.557        | 5.502        |
| Sub-total                 |              |              |              |
| D+L pooled RR             | 1.576        | 0.913        | 2.719        |
| <b>Overall</b>            |              |              |              |
| D+L pooled RR             | <b>1.354</b> | <b>1.259</b> | <b>1.457</b> |

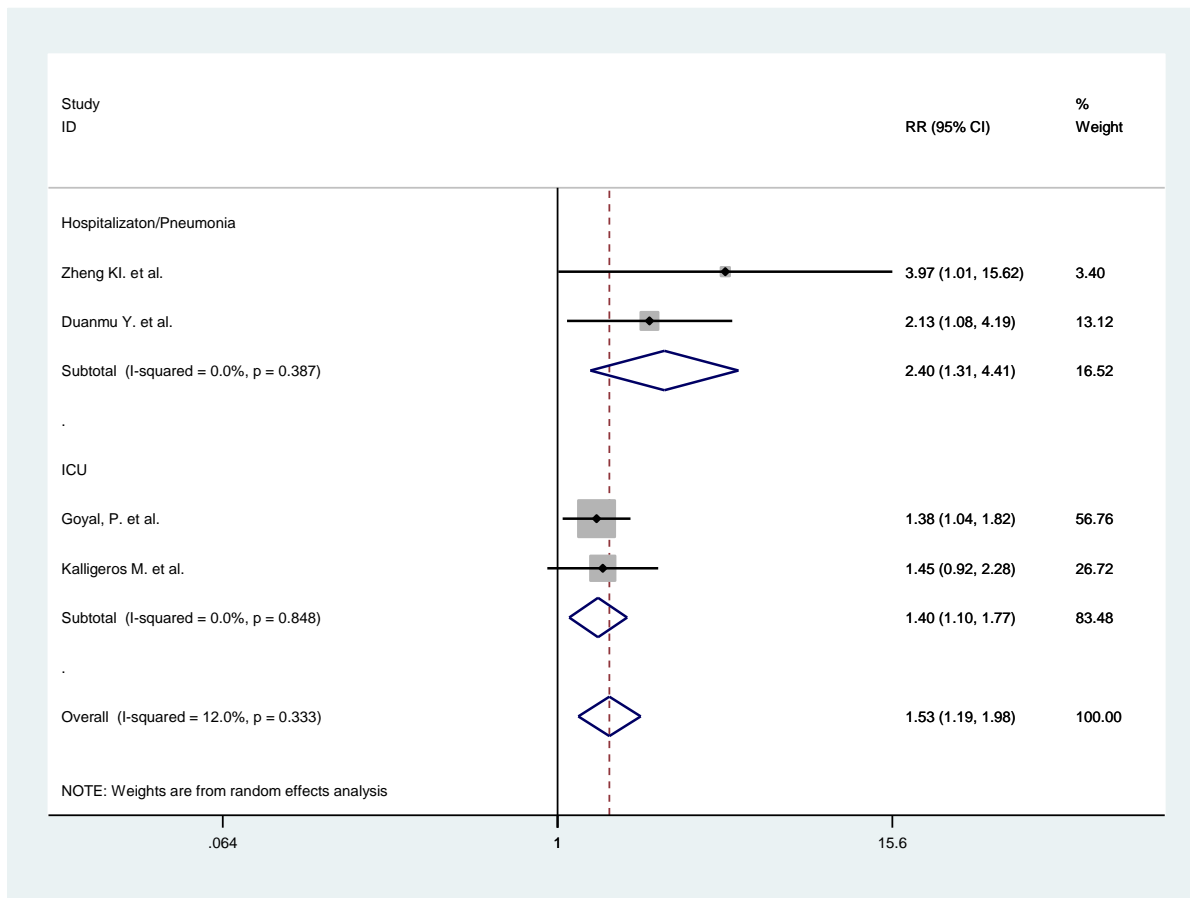

| Study                            | RR           | [95% Conf. Interval] |
|----------------------------------|--------------|----------------------|
| <b>Hospitalisation/Pneumonia</b> |              |                      |
| Zheng KI. et al.                 | 3.967        | 1.007 15.619         |
| Duanmu Y. et al.                 | 2.127        | 1.080 4.189          |
| Sub-total                        |              |                      |
| D+L pooled RR                    | <b>2.404</b> | <b>1.310 4.413</b>   |
| <b>ICU</b>                       |              |                      |
| Goyal, P. et al.                 | 1.376        | 1.042 1.817          |
| Kalligeros M. et al.             | 1.450        | 0.921 2.284          |
| Sub-total                        |              |                      |
| D+L pooled RR                    | <b>1.396</b> | <b>1.101 1.769</b>   |
| <b>Overall</b>                   |              |                      |
| D+L pooled RR                    | <b>1.532</b> | <b>1.187 1.977</b>   |

Smoking

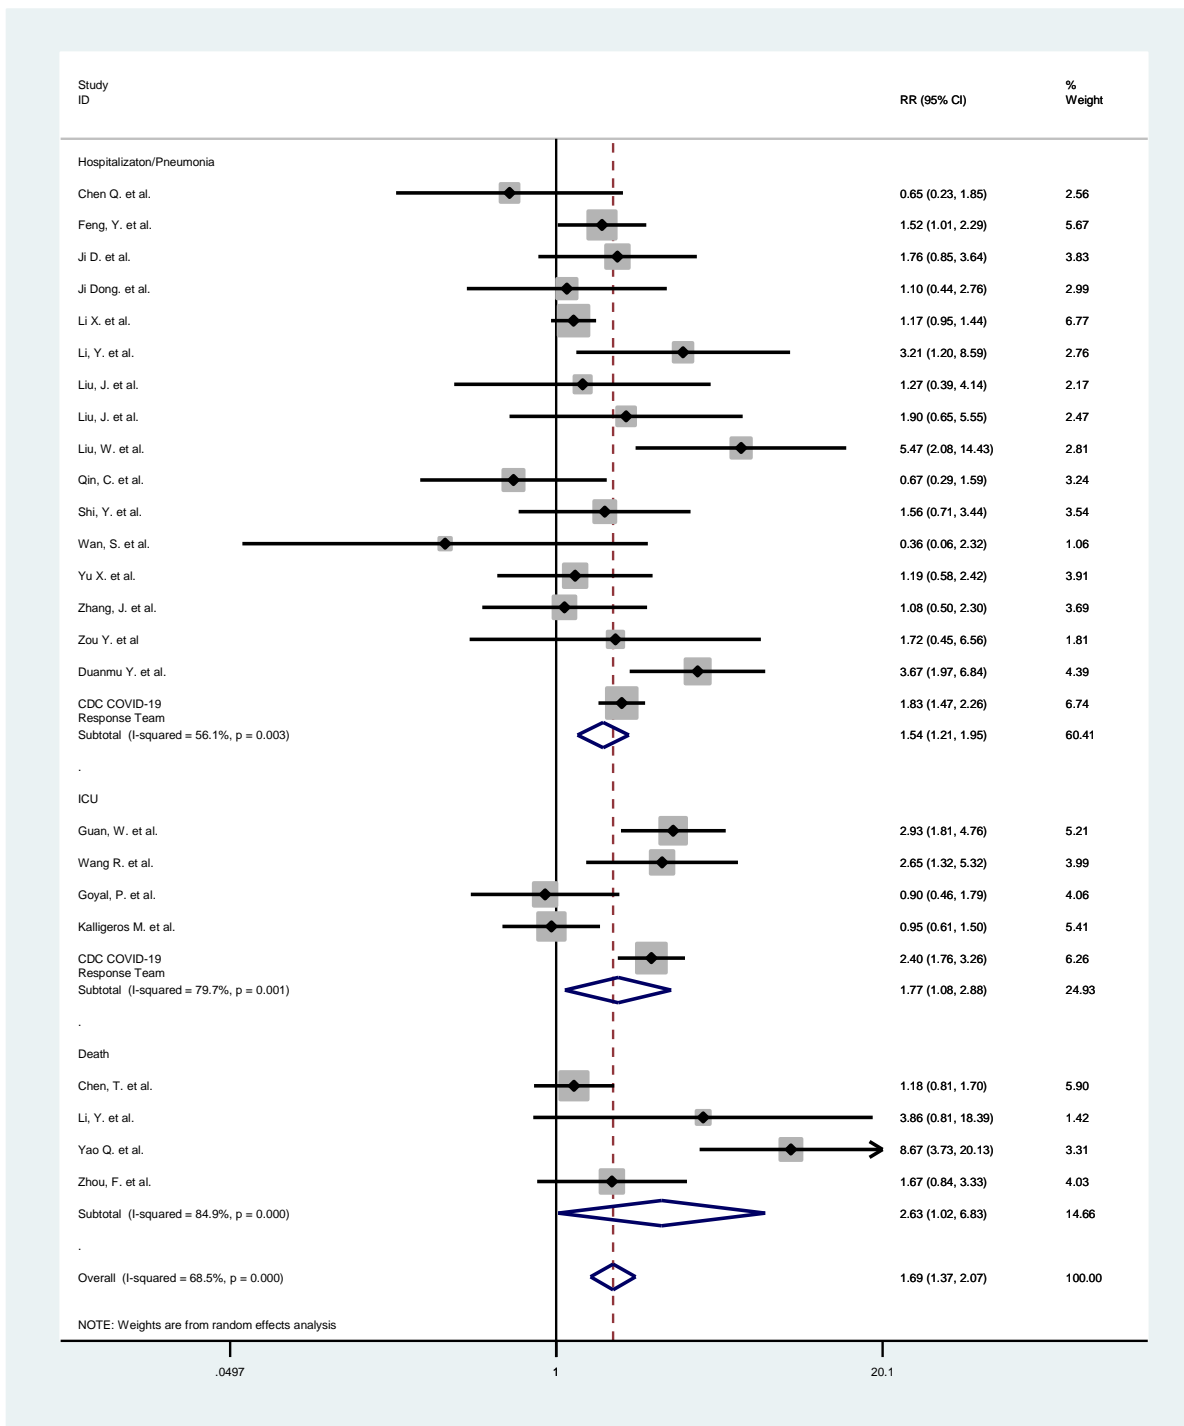

| Study                            | RR    | [95% Conf. Interval] |
|----------------------------------|-------|----------------------|
| <b>Hospitalisation/Pneumonia</b> |       |                      |
| Chen Q. et al.                   | 0.650 | 0.229 - 1.847        |
| Feng, Y. et al.                  | 1.523 | 1.013 - 2.290        |
| Ji D. et al.                     | 1.755 | 0.847 - 3.637        |
| Ji Dong. et al.                  | 1.101 | 0.439 - 2.763        |
| Li X. et al.                     | 1.171 | 0.952 - 1.441        |
| Li, Y. et al.                    | 3.214 | 1.203 - 8.591        |
| Liu, J. et al.                   | 1.273 | 0.391 - 4.141        |



|                       |              |              |              |
|-----------------------|--------------|--------------|--------------|
| Liu, J. et al.        | 1.900        | 0.650        | 5.550        |
| Liu, W. et al.        | 5.475        | 2.077        | 14.434       |
| Qin, C. et al.        | 0.674        | 0.286        | 1.590        |
| Shi, Y. et al.        | 1.559        | 0.707        | 3.438        |
| Wan, S. et al.        | 0.359        | 0.056        | 2.320        |
| Yu X. et al.          | 1.188        | 0.582        | 2.425        |
| Zhang, J. et al.      | 1.078        | 0.505        | 2.302        |
| Zou Y. et al          | 1.720        | 0.451        | 6.564        |
| Duanmu Y. et al.      | 3.667        | 1.967        | 6.836        |
| CDC COVID-19 Response | 1.826        | 1.474        | 2.263        |
| Sub-total             |              |              |              |
| D+L pooled RR         | <b>1.537</b> | <b>1.213</b> | <b>1.948</b> |
| <b>ICU</b>            |              |              |              |
| Guan, W. et al.       | 2.934        | 1.809        | 4.756        |
| Wang R. et al.        | 2.649        | 1.319        | 5.323        |
| Goyal, P. et al.      | 0.902        | 0.455        | 1.790        |
| Kalligeros M. et al.  | 0.955        | 0.609        | 1.497        |
| CDC COVID-19 Response | 2.398        | 1.762        | 3.264        |
| Sub-total             |              |              |              |
| D+L pooled RR         | <b>1.765</b> | <b>1.083</b> | <b>2.878</b> |
| <b>Death</b>          |              |              |              |
| Chen, T. et al.       | 1.177        | 0.813        | 1.703        |
| Li, Y. et al.         | 3.857        | 0.809        | 18.387       |
| Yao Q. et al.         | 8.667        | 3.732        | 20.128       |
| Zhou, F. et al.       | 1.670        | 0.837        | 3.329        |
| Sub-total             |              |              |              |
| D+L pooled RR         | <b>2.634</b> | <b>1.016</b> | <b>6.826</b> |
| <b>Overall</b>        |              |              |              |
| D+L pooled RR         | <b>1.685</b> | <b>1.369</b> | <b>2.074</b> |

## 6. Meta-analysis of Comorbidities and Hospitalisation

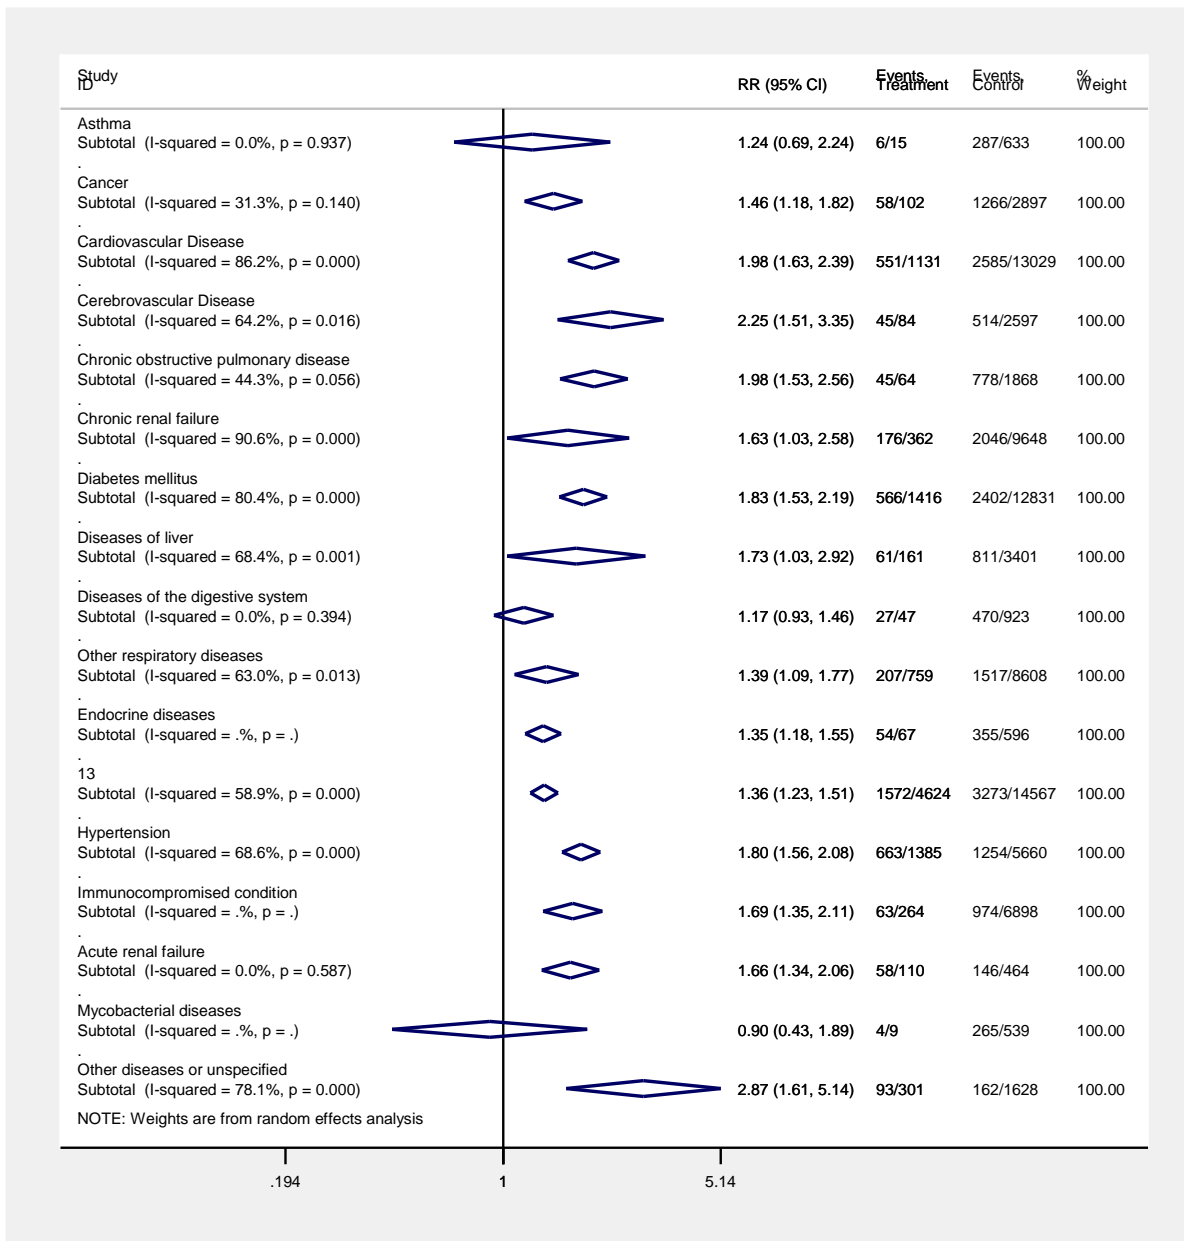

| Comorbidity         | Study             | RR  | [95% Conf. Interval] |     |
|---------------------|-------------------|-----|----------------------|-----|
| Acute renal failure | Xiao, G. et al.   | 1.8 | 1.2                  | 2.6 |
|                     | Xiao, G. et al.   | 1.6 | 1.2                  | 2.1 |
|                     | D+L pooled        | 1.7 | 1.3                  | 2.1 |
| Asthma              | Li X. et al.      | 1.2 | 0.6                  | 2.5 |
|                     | Duanmu Y. et al.  | 1.3 | 0.5                  | 3.6 |
|                     | D+L pooled        | 1.2 | 0.7                  | 2.2 |
| Cancer              | Feng, Y. et al.   | 2.3 | 1.4                  | 3.8 |
|                     | Li X. et al.      | 1.2 | 0.8                  | 1.7 |
|                     | Liu, Jing. et al. | 0.8 | 0.1                  | 4.4 |
|                     | Mao, L. et al.    | 0.9 | 0.5                  | 1.9 |

|                                              |     |     |      |
|----------------------------------------------|-----|-----|------|
| Qin, C. et al.                               | 1.1 | 0.8 | 1.6  |
| Wan, S. et al.                               | 2.7 | 1.4 | 5.0  |
| Yao Q. et al.                                | 4.4 | 1.0 | 19.5 |
| Zhang Jixiang.                               | 1.3 | 1.0 | 1.7  |
| Zhang Y. et al.                              | 1.7 | 0.6 | 4.9  |
| Zhao X. et al.                               | 2.1 | 0.9 | 4.9  |
| Zhu, Z. et al.                               | 1.6 | 0.3 | 10.0 |
| Duanmu Y. et al.                             | 1.4 | 0.3 | 7.2  |
| D+L pooled                                   | 1.5 | 1.2 | 1.8  |
| <b>Cardiovascular Disease</b>                |     |     |      |
| Feng, Y. et al.                              | 1.8 | 1.2 | 2.7  |
| Guan, W. et al.                              | 2.2 | 1.5 | 3.2  |
| Li, Y. et al.                                | 0.7 | 0.1 | 3.9  |
| Liu, J. et al.                               | 2.8 | 1.1 | 6.8  |
| Qin, C. et al.                               | 1.4 | 1.2 | 1.7  |
| Shi, Y. et al.                               | 3.8 | 1.7 | 8.8  |
| Wan, S. et al.                               | 3.2 | 2.1 | 4.9  |
| Wang, X. et al.                              | 3.5 | 1.7 | 7.3  |
| Wei X. et al.                                | 1.6 | 1.2 | 2.2  |
| Wei YY. et al.                               | 1.8 | 0.9 | 3.8  |
| Yu X. et al.                                 | 2.1 | 1.1 | 3.9  |
| Zhang G. et al.                              | 2.8 | 1.8 | 4.3  |
| Zhang Jixiang. et al.                        | 1.4 | 1.3 | 1.6  |
| Zhu, Z. et al.                               | 2.9 | 0.8 | 9.9  |
| Deng Q. et al.                               | 1.3 | 0.9 | 1.8  |
| Li K. et al.                                 | 2.5 | 1.1 | 6.0  |
| Li X. et al.                                 | 1.8 | 1.5 | 2.1  |
| Xie, H. et al.                               | 0.8 | 0.2 | 2.7  |
| Zhang, J. et al.                             | 1.4 | 0.7 | 2.8  |
| Zhang, J. et al.                             | 2.7 | 1.2 | 5.9  |
| Zheng S. et al.                              | 1.3 | 1.0 | 1.6  |
| Zheng, F. et al.                             | 2.8 | 1.0 | 7.9  |
| CDC COVID-19 Team                            | 3.1 | 2.7 | 3.5  |
| D+L pooled                                   | 2.0 | 1.6 | 2.4  |
| <b>Cerebrovascular Disease</b>               |     |     |      |
| Mao, L. et al.                               | 1.1 | 0.7 | 2.0  |
| Feng, Y. et al.                              | 2.1 | 1.3 | 3.4  |
| Guan, W. et al.                              | 3.3 | 2.2 | 4.8  |
| Zhang G. et al.                              | 3.4 | 2.3 | 5.1  |
| Zhang, J. et al.                             | 1.8 | 0.6 | 4.9  |
| Zheng, F. et al.                             | 1.4 | 0.2 | 7.6  |
| D+L pooled                                   | 2.2 | 1.5 | 3.3  |
| <b>Chronic Obstructive Pulmonary Disease</b> |     |     |      |
| Deng Q. et al.                               | 1.3 | 0.7 | 2.3  |
| Li K. et al.                                 | 3.0 | 1.7 | 5.3  |
| Li X. et al.                                 | 1.6 | 1.2 | 2.1  |
| Li, Y. et al.                                | 3.2 | 1.3 | 7.7  |
| Liu, J. et al.                               | 2.4 | 1.0 | 5.6  |
| Liu, W. et al.                               | 3.8 | 0.8 | 17.1 |
| Qin, C. et al.                               | 1.2 | 0.9 | 1.7  |
| Zhang G. et al.                              | 2.8 | 1.5 | 5.2  |

|                              |                   |      |     |      |
|------------------------------|-------------------|------|-----|------|
|                              | Zhao X. et al.    | 2.3  | 1.0 | 5.4  |
|                              | Zheng, F. et al.  | 1.8  | 0.6 | 6.0  |
|                              | Duanmu Y. et al.  | 3.2  | 1.3 | 7.7  |
|                              | D+L pooled        | 2.0  | 1.5 | 2.6  |
| <b>Chronic renal failure</b> |                   |      |     |      |
|                              | Chen Q. et al.    | 1.1  | 0.2 | 5.7  |
|                              | Cheng, Y. et al.  | 1.3  | 1.0 | 1.6  |
|                              | Li X. et al.      | 1.2  | 0.7 | 2.0  |
|                              | Mao, L. et al.    | 0.8  | 0.3 | 2.5  |
|                              | Shi, Y. et al.    | 2.9  | 0.9 | 9.7  |
|                              | Zhang Jixiang.    | 1.2  | 1.0 | 1.6  |
|                              | Zhao X. et al.    | 2.3  | 1.0 | 5.4  |
|                              | CDC COVID-19 Team | 3.3  | 2.8 | 3.9  |
|                              | D+L pooled        | 1.6  | 1.0 | 2.6  |
| <b>Diabetes mellitus</b>     |                   |      |     |      |
|                              | Chen Q. et al.    | 1.8  | 1.0 | 3.3  |
|                              | Chen, G. et al.   | 1.3  | 0.5 | 3.4  |
|                              | Deng Q. et al.    | 1.3  | 0.9 | 1.8  |
|                              | Feng, Y. et al.   | 1.8  | 1.2 | 2.6  |
|                              | Guan, W. et al.   | 2.4  | 1.9 | 3.2  |
|                              | Li K. et al.      | 3.9  | 2.5 | 6.0  |
|                              | Li X. et al.      | 1.3  | 1.1 | 1.6  |
|                              | Li, Y. et al.     | 2.2  | 0.8 | 5.8  |
|                              | Liu, J. et al.    | 2.5  | 1.1 | 5.6  |
|                              | Liu, J. et al.    | 2.4  | 1.0 | 5.6  |
|                              | Liu, W. et al.    | 3.2  | 0.9 | 11.2 |
|                              | Mao, L. et al.    | 1.3  | 0.8 | 1.9  |
|                              | Qin, C. et al.    | 1.1  | 1.0 | 1.4  |
|                              | Shi, Y. et al.    | 2.6  | 1.3 | 5.3  |
|                              | Wan, S. et al.    | 3.0  | 1.9 | 4.7  |
|                              | Wang, X. et al.   | 2.7  | 1.4 | 5.3  |
|                              | Wei X. et al.     | 1.0  | 0.7 | 1.5  |
|                              | Wei YY. et al.    | 4.3  | 2.4 | 7.7  |
|                              | Xie, H. et al.    | 0.7  | 0.2 | 2.4  |
|                              | Yao Q. et al.     | 3.7  | 1.1 | 12.6 |
|                              | Yu X. et al.      | 2.3  | 1.3 | 4.1  |
|                              | Zhang G. et al    | 1.3  | 0.7 | 2.6  |
|                              | Zhang Y. et al.   | 1.6  | 0.7 | 3.6  |
|                              | Zhang, J. et al.  | 1.2  | 0.7 | 2.0  |
|                              | Zhang, J. et al.  | 2.3  | 0.9 | 5.6  |
|                              | Zhao X. et al.    | 1.0  | 0.2 | 5.2  |
|                              | Zheng S. et al.   | 1.2  | 1.0 | 1.5  |
|                              | Zheng, F. et al.  | 1.6  | 0.5 | 5.3  |
|                              | Duanmu Y. et al.  | 1.3  | 0.5 | 3.6  |
|                              | CDC COVID-19 Team | 2.6  | 2.3 | 2.9  |
|                              | D+L pooled RR     | 1.8  | 1.5 | 2.2  |
| <b>Diseases of liver</b>     |                   |      |     |      |
|                              | Chen Q. et al.    | 2.4  | 1.3 | 4.4  |
|                              | Guan, W. et al.   | 2.0  | 1.2 | 3.6  |
|                              | Ji Dong. et al.   | 11.3 | 4.6 | 27.6 |
|                              | Li X. et al.      | 0.8  | 0.3 | 2.4  |
|                              | Shi, Y. et al.    | 0.9  | 0.2 | 3.5  |

|                                         |                       |     |     |     |
|-----------------------------------------|-----------------------|-----|-----|-----|
|                                         | Wan, S. et al.        | 1.7 | 0.4 | 7.0 |
|                                         | Yu X. et al.          | 0.8 | 0.1 | 4.3 |
|                                         | Zhang, J. et al.      | 1.2 | 0.6 | 2.5 |
|                                         | Zheng S. et al.       | 0.9 | 0.4 | 1.9 |
|                                         | Zhu, Z. et al.        | 2.4 | 0.7 | 8.7 |
|                                         | D+L pooled            | 1.7 | 1.0 | 2.9 |
| <b>Diseases of the digestive system</b> |                       |     |     |     |
|                                         | Wei YY. et al.        | 2.0 | 0.7 | 5.2 |
|                                         | Zhang Jixiang. et al. | 1.2 | 0.9 | 1.5 |
|                                         | Zhang, J. et al.      | 0.7 | 0.2 | 2.2 |
|                                         | D+L pooled            | 1.2 | 0.9 | 1.5 |
| <b>Endocrine disease</b>                |                       |     |     |     |
|                                         | Zhang Jixiang.        | 1.4 | 1.2 | 1.5 |
|                                         | D+L pooled R          | 1.4 | 1.2 | 1.5 |
| <b>Hypertension</b>                     |                       |     |     |     |
|                                         | Chen Q. et al.        | 1.5 | 0.8 | 2.6 |
|                                         | Chen, G. et al.       | 1.8 | 0.9 | 3.7 |
|                                         | Deng Q. et al.        | 1.2 | 0.9 | 1.6 |
|                                         | Feng, Y. et al.       | 1.5 | 1.1 | 2.1 |
|                                         | Guan, W. et al.       | 2.6 | 2.1 | 3.3 |
|                                         | Li K. et al.          | 1.4 | 0.4 | 4.2 |
|                                         | Li X. et al.          | 1.5 | 1.2 | 1.7 |
|                                         | Li, Y. et al.         | 1.4 | 0.3 | 6.4 |
|                                         | Liu, J. et al.        | 3.5 | 1.8 | 7.2 |
|                                         | Liu, J. et al.        | 2.2 | 1.0 | 4.8 |
|                                         | Liu, W. et al.        | 1.9 | 0.5 | 7.5 |
|                                         | Mao, L. et al.        | 1.8 | 1.4 | 2.5 |
|                                         | Qin, C. et al.        | 1.4 | 1.2 | 1.6 |
|                                         | Shi, Y. et al.        | 4.4 | 2.6 | 7.4 |
|                                         | Wan, S. et al.        | 1.0 | 0.4 | 2.5 |
|                                         | Wang, X. et al.       | 1.3 | 0.6 | 2.9 |
|                                         | Wei X. et al.         | 1.4 | 1.1 | 1.8 |
|                                         | Xie, H. et al.        | 0.8 | 0.3 | 1.9 |
|                                         | Yao Q. et al.         | 1.0 | 0.3 | 4.3 |
|                                         | Yu X. et al.          | 2.0 | 1.1 | 3.6 |
|                                         | Zhang G. et al.       | 2.8 | 1.8 | 4.3 |
|                                         | Zhang Y. et al.       | 2.8 | 1.5 | 5.3 |
|                                         | Zhang, J. et al.      | 1.4 | 1.0 | 2.1 |
|                                         | Zhang, J. et al.      | 2.2 | 0.6 | 8.1 |
|                                         | Zhao X. et al.        | 1.7 | 1.0 | 3.1 |
|                                         | Zheng S. et al.       | 1.3 | 1.0 | 1.5 |
|                                         | Zheng, F. et al.      | 4.2 | 2.4 | 7.5 |
|                                         | Zhu, Z. et al.        | 3.1 | 1.3 | 7.6 |
|                                         | Duanmu Y. et al.      | 2.1 | 1.1 | 4.2 |
|                                         | D+L pooled            | 1.8 | 1.6 | 2.1 |
| <b>Immunocompromised condition</b>      |                       |     |     |     |
|                                         | CDC COVID-19 Team     | 1.7 | 1.4 | 2.1 |
|                                         | D+L pooled            | 1.7 | 1.4 | 2.1 |
| <b>Mycobacterial disease</b>            |                       |     |     |     |
|                                         | Li X. et al.          | 0.9 | 0.4 | 1.9 |
|                                         | D+L pooled            | 0.9 | 0.4 | 1.9 |

| Other diseases or unspecified disease |                   |     |     |      |
|---------------------------------------|-------------------|-----|-----|------|
|                                       | Ji D. et al.      | 6.0 | 3.5 | 10.4 |
|                                       | Ji Dong. et al.   | 5.3 | 3.0 | 9.2  |
|                                       | Ma J. et al.      | 1.4 | 0.8 | 2.5  |
|                                       | Wang, X. et al.   | 0.9 | 0.3 | 2.7  |
|                                       | Wei YY. et al.    | 2.4 | 1.3 | 4.6  |
|                                       | Zou Y. et al.     | 4.2 | 1.8 | 9.7  |
|                                       | D+L pooled        | 2.9 | 1.6 | 5.1  |
| Other respiratory diseases            |                   |     |     |      |
|                                       | Wang, X. et al.   | 1.0 | 0.3 | 3.8  |
|                                       | Wei YY. et al.    | 2.9 | 1.0 | 8.2  |
|                                       | Zhang Jixiang.    | 1.2 | 1.0 | 1.5  |
|                                       | Zhang, J. et al.  | 0.9 | 0.5 | 1.7  |
|                                       | Zheng S. et al.   | 1.2 | 0.9 | 1.6  |
|                                       | Zhu, Z. et al.    | 2.9 | 0.8 | 9.9  |
|                                       | CDC COVID-19 Team | 1.7 | 1.5 | 2.0  |
|                                       | D+L pooled        | 1.4 | 1.1 | 1.8  |

## 7. Meta-analysis of Comorbidities and ICU admission

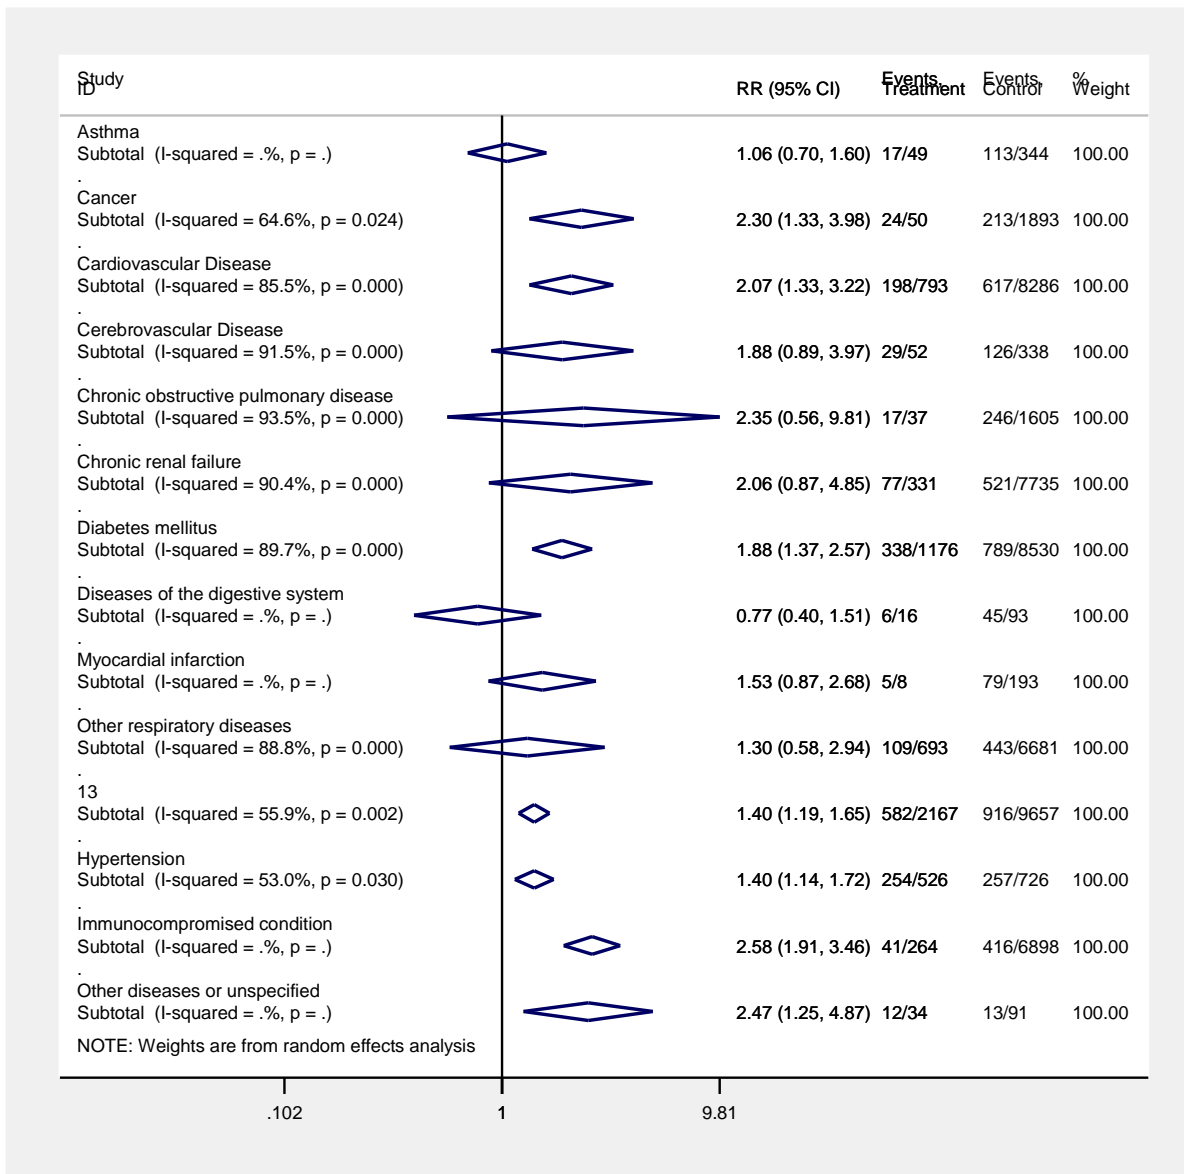

| Comorbidity            | Study                | RR  | [95% Conf. Interval] |      |
|------------------------|----------------------|-----|----------------------|------|
| Asthma                 | Goyal, P. et al.     | 1.1 | 0.7                  | 1.6  |
|                        | D+L pooled           | 1.1 | 0.7                  | 1.6  |
| Cancer                 | Lei, S. et al.       | 1.4 | 0.7                  | 3.0  |
|                        | Liang, W. et al.     | 4.9 | 2.7                  | 9.0  |
|                        | Liu, W. et al.       | 4.1 | 1.3                  | 13.1 |
|                        | Wang, D. et al.      | 1.6 | 0.7                  | 3.6  |
|                        | Kalligeros M. et al. | 1.6 | 1.0                  | 2.8  |
|                        | D+L pooled           | 2.3 | 1.3                  | 4.0  |
| Cardiovascular Disease | Huang, C. et al.     | 1.8 | 0.7                  | 4.6  |
|                        | Lei, S. et al.       | 2.6 | 1.4                  | 4.7  |
|                        | Liu, Y. et al.       | 0.9 | 0.4                  | 2.1  |
|                        | Wang, D. et al.      | 2.0 | 1.1                  | 3.5  |

|                                              |                      |      |     |      |
|----------------------------------------------|----------------------|------|-----|------|
|                                              | Guan, W. et al.      | 3.9  | 1.9 | 8.2  |
|                                              | Goyal, P. et al.     | 1.5  | 1.1 | 2.1  |
|                                              | Kalligeros M. et al. | 1.5  | 0.9 | 2.3  |
|                                              | CDC COVID-19 Team    | 4.1  | 3.4 | 4.9  |
|                                              | D+L pooled           | 2.1  | 1.3 | 3.2  |
| <b>Cerebrovascular Disease</b>               |                      |      |     |      |
|                                              | Du, R. et al.        | 0.8  | 0.5 | 1.3  |
|                                              | Lei, S. et al.       | 2.0  | 1.1 | 3.9  |
|                                              | Liu, Y. et al.       | 2.0  | 1.5 | 2.7  |
|                                              | Wang, D. et al.      | 3.7  | 2.4 | 5.8  |
|                                              | D+L pooled           | 1.9  | 0.9 | 4.0  |
| <b>Chronic obstructive pulmonary disease</b> |                      |      |     |      |
|                                              | Guan, W. et al.      | 10.6 | 6.2 | 18.1 |
|                                              | Huang, C. et al.     | 2.5  | 1.0 | 6.2  |
|                                              | Liu, Y. et al.       | 1.0  | 0.4 | 2.8  |
|                                              | Goyal, P. et al.     | 1.1  | 0.6 | 2.0  |
|                                              | D+L pooled           | 2.4  | 0.6 | 9.8  |
| <b>Chronic renal failure</b>                 |                      |      |     |      |
|                                              | Cheng, Y. et al.     | 1.3  | 0.7 | 2.3  |
|                                              | Duanmu Y. et al.     | 3.1  | 1.6 | 6.2  |
|                                              | Kalligeros M. et al. | 0.8  | 0.4 | 1.9  |
|                                              | CDC COVID-19 Team    | 4.6  | 3.6 | 5.8  |
|                                              | D+L pooled           | 2.1  | 0.9 | 4.9  |
| <b>Diabetes mellitus</b>                     |                      |      |     |      |
|                                              | Du, R. et al.        | 1.2  | 0.8 | 1.8  |
|                                              | Guan, W. et al.      | 4.6  | 2.8 | 7.5  |
|                                              | Huang, C. et al.     | 0.3  | 0.1 | 2.3  |
|                                              | Lei, S. et al.       | 2.2  | 1.1 | 4.2  |
|                                              | Liu, Y. et al.       | 2.1  | 1.6 | 2.8  |
|                                              | Wang, D. et al.      | 2.5  | 1.4 | 4.4  |
|                                              | Wu, C. et al.        | 1.9  | 1.4 | 2.6  |
|                                              | Yan Y. et al.        | 1.6  | 1.2 | 2.1  |
|                                              | Simonnet A. et al.   | 1.3  | 1.0 | 1.6  |
|                                              | Goyal, P. et al.     | 1.1  | 0.8 | 1.6  |
|                                              | Kalligeros M. et al. | 1.6  | 1.0 | 2.4  |
|                                              | CDC COVID-19 Team    | 3.9  | 3.3 | 4.7  |
|                                              | D+L pooled           | 1.9  | 1.4 | 2.6  |
| <b>Diseases of the digestive system</b>      |                      |      |     |      |
|                                              | Du, R. et al.        | 0.8  | 0.4 | 1.5  |
|                                              | D+L pooled           | 0.8  | 0.4 | 1.5  |
| <b>Hypertension</b>                          |                      |      |     |      |
|                                              | Du, R. et al.        | 0.9  | 0.6 | 1.3  |
|                                              | Huang, C. et al.     | 1.1  | 0.3 | 3.6  |
|                                              | Lei, S. et al.       | 2.4  | 1.1 | 5.2  |
|                                              | Liu, Y. et al.       | 1.3  | 0.9 | 1.9  |
|                                              | Wang, D. et al.      | 3.1  | 1.8 | 5.4  |
|                                              | Wu, C. et al.        | 1.6  | 1.1 | 2.2  |
|                                              | Simonnet A. et al.   | 1.4  | 1.1 | 1.8  |
|                                              | Goyal, P. et al.     | 1.2  | 0.9 | 1.5  |
|                                              | Kalligeros M. et al. | 1.3  | 0.8 | 2.2  |
|                                              | D+L pooled           | 1.4  | 1.1 | 1.7  |



| Immunocompromised condition |                      |     |     |     |
|-----------------------------|----------------------|-----|-----|-----|
|                             | CDC COVID-19 Team    | 2.6 | 1.9 | 3.5 |
|                             | D+L pooled           | 2.6 | 1.9 | 3.5 |
| Myocardial infarction       |                      |     |     |     |
|                             | Wu, C. et al.        | 1.5 | 0.9 | 2.7 |
|                             | D+L pooled           | 1.5 | 0.9 | 2.7 |
| Other respiratory disease   |                      |     |     |     |
|                             | Du, R. et al.        | 0.5 | 0.2 | 1.1 |
|                             | Kalligeros M. et al. | 1.4 | 0.9 | 2.2 |
|                             | CDC COVID-19 Team    | 2.6 | 2.1 | 3.2 |
|                             | D+L pooled           | 1.3 | 0.6 | 2.9 |

## 8. Meta-analysis of Comorbidities and Death

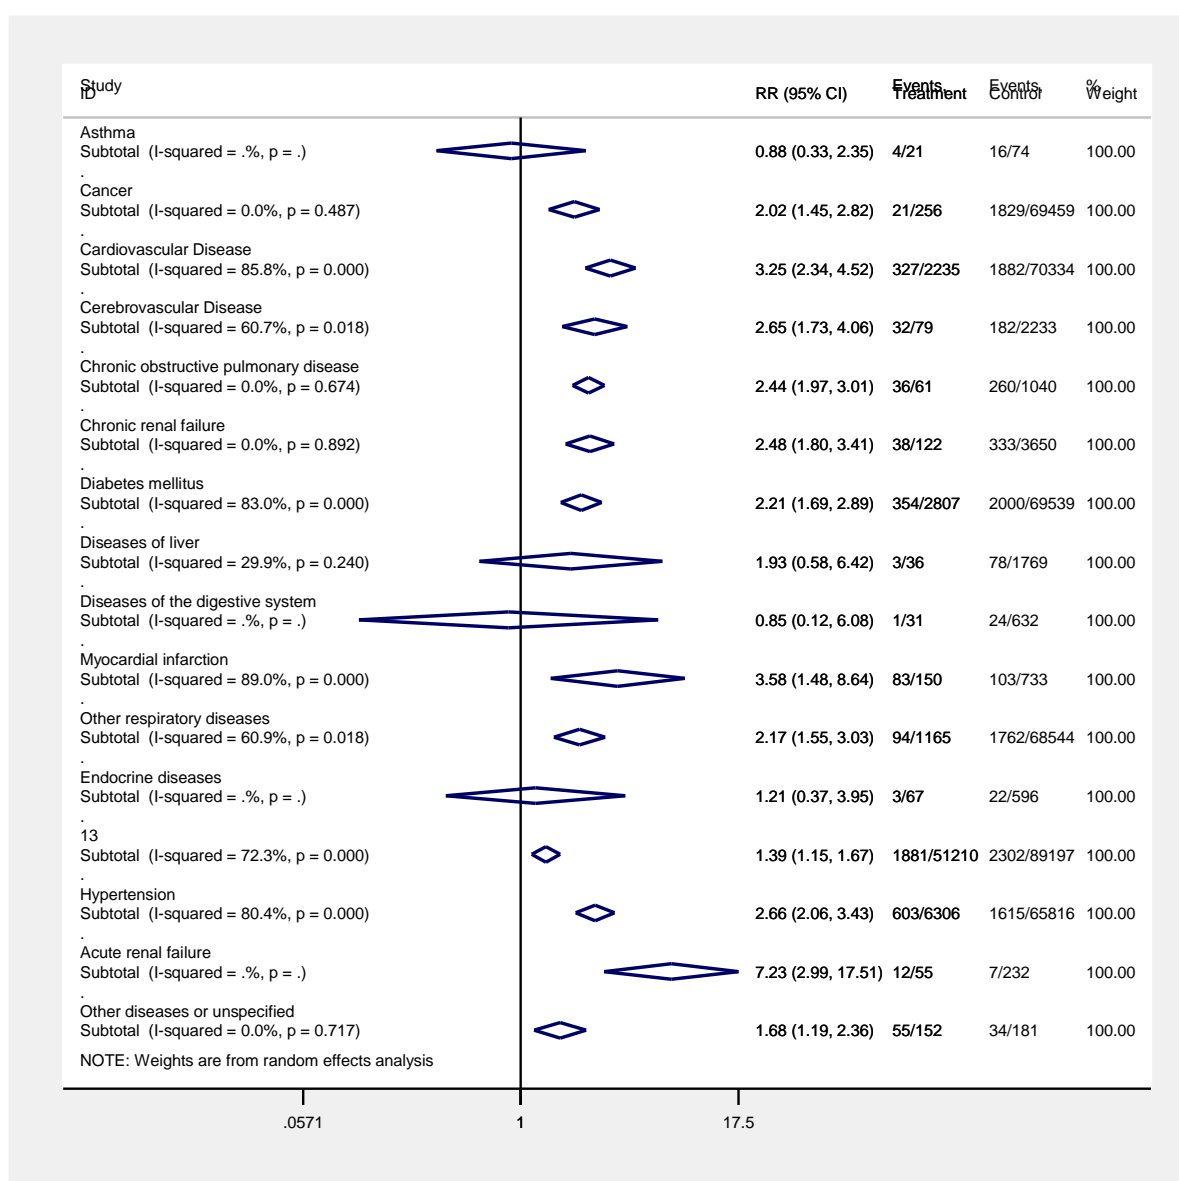

| Comorbidity         | Study | RR | [95% Conf. Interval] |
|---------------------|-------|----|----------------------|
| Acute renal failure |       |    |                      |

|                                              |                            |     |     |      |
|----------------------------------------------|----------------------------|-----|-----|------|
|                                              | Xiao, G. et al.            | 7.2 | 3.0 | 17.5 |
|                                              | D+L pooled                 | 7.2 | 3.0 | 17.5 |
| <b>Asthma</b>                                |                            |     |     |      |
|                                              | Tomlins J. et al.          | 0.9 | 0.3 | 2.4  |
|                                              | D+L pooled                 | 0.9 | 0.3 | 2.4  |
| <b>Cancer</b>                                |                            |     |     |      |
|                                              | Chen, T. et al.            | 1.8 | 1.1 | 2.9  |
|                                              | Deng G. et al.             | 2.9 | 1.3 | 6.4  |
|                                              | The Novel Coronavirus Team | 2.5 | 1.1 | 5.4  |
|                                              | Yang, X. et al.            | 0.8 | 0.2 | 3.3  |
|                                              | Yao Q. et al.              | 4.8 | 1.1 | 21.5 |
|                                              | Zhang Jixiang. et al.      | 1.9 | 0.3 | 13.3 |
|                                              | Nikpouraghdam M. et al.    | 0.7 | 0.1 | 4.9  |
|                                              | D+L pooled                 | 2.0 | 1.4 | 2.8  |
| <b>Cardiovascular Disease</b>                |                            |     |     |      |
|                                              | Cao, J. et al.             | 2.4 | 0.8 | 7.8  |
|                                              | Chen, T. et al.            | 1.8 | 1.3 | 2.5  |
|                                              | Deng G. et al.             | 6.7 | 5.4 | 8.4  |
|                                              | Fan J. et al.              | 3.2 | 0.6 | 17.2 |
|                                              | Guan, W. et al.            | 4.9 | 2.4 | 10.1 |
|                                              | Guo, T. et al.             | 3.8 | 2.2 | 6.7  |
|                                              | Li, Y. et al.              | 1.3 | 0.2 | 8.9  |
|                                              | The Novel Coronavirus Team | 5.0 | 4.0 | 6.1  |
|                                              | Wang Dawei et al.          | 4.2 | 2.0 | 8.8  |
|                                              | Wang, L. et al.            | 2.6 | 1.7 | 4.0  |
|                                              | Wang, Y. et al.            | 1.5 | 1.1 | 2.1  |
|                                              | Yao Q. et al.              | 5.2 | 1.7 | 16.3 |
|                                              | Zhang Jixiang. et al.      | 5.4 | 2.4 | 12.0 |
|                                              | Zhou, F. et al.            | 3.5 | 2.4 | 5.0  |
|                                              | Nikpouraghdam M. et al.    | 1.3 | 0.5 | 3.4  |
|                                              | D+L pooled                 | 3.3 | 2.3 | 4.5  |
| <b>Cerebrovascular Disease</b>               |                            |     |     |      |
|                                              | Cao, J. et al.             | 3.2 | 1.3 | 8.1  |
|                                              | Guan, W. et al.            | 7.1 | 3.3 | 15.4 |
|                                              | Wang Dawei et al.          | 3.2 | 1.3 | 7.9  |
|                                              | Yang, X. et al.            | 1.7 | 1.2 | 2.3  |
|                                              | Wang, L. et al.            | 2.8 | 1.7 | 4.6  |
|                                              | Yuan, M. et al.            | 2.1 | 0.8 | 5.5  |
|                                              | Tomlins J. et al.          | 1.2 | 0.3 | 4.3  |
|                                              | D+L pooled                 | 2.6 | 1.7 | 4.1  |
| <b>Chronic obstructive pulmonary disease</b> |                            |     |     |      |
|                                              | Li, Y. et al.              | 6.0 | 1.3 | 26.8 |
|                                              | Wang Dawei et al.          | 1.9 | 0.4 | 10.1 |
|                                              | Wang, L. et al.            | 3.1 | 1.9 | 5.0  |
|                                              | Wang, Y. et al.            | 2.2 | 1.7 | 2.9  |
|                                              | Zhou, F. et al.            | 2.5 | 1.3 | 4.6  |
|                                              | Tomlins J. et al.          | 2.1 | 0.9 | 5.1  |
|                                              | D+L pooled                 | 2.4 | 2.0 | 3.0  |
| <b>Chronic renal failure</b>                 |                            |     |     |      |
|                                              | Cheng, Y. et al.           | 2.6 | 1.8 | 3.6  |
|                                              | Wang Dawei et al.          | 1.9 | 0.4 | 10.1 |

|                                  |                            |     |     |      |
|----------------------------------|----------------------------|-----|-----|------|
|                                  | Nikpouraghdam M. et al.    | 2.1 | 0.7 | 5.9  |
|                                  | D+L pooled                 | 2.5 | 1.8 | 3.4  |
| <hr/>                            |                            |     |     |      |
| Diabetes mellitus                |                            |     |     |      |
|                                  | Cao, J. et al.             | 2.4 | 0.9 | 5.9  |
|                                  | Chen, T. et al.            | 1.3 | 0.9 | 1.8  |
|                                  | Deng G. et al.             | 4.4 | 3.5 | 5.6  |
|                                  | Guan, W. et al.            | 3.9 | 2.2 | 7.2  |
|                                  | Li, Y. et al.              | 4.2 | 1.3 | 13.3 |
|                                  | The Novel Coronavirus Team | 3.4 | 2.7 | 4.2  |
|                                  | Wang Dawei et al.          | 3.1 | 1.4 | 7.0  |
|                                  | Wang, L. et al.            | 1.1 | 0.6 | 1.9  |
|                                  | Wang, Y. et al.            | 1.3 | 0.9 | 1.7  |
|                                  | Wu, C. et al.              | 2.7 | 1.6 | 4.6  |
|                                  | Yan Y. et al.              | 1.7 | 1.4 | 2.1  |
|                                  | Yang, X. et al.            | 1.3 | 0.9 | 2.1  |
|                                  | Yao Q. et al.              | 1.9 | 0.3 | 11.8 |
|                                  | Yuan, M. et al.            | 4.5 | 1.9 | 10.6 |
|                                  | Zhang Y. et al.            | 3.9 | 0.4 | 39.3 |
|                                  | Zhou, F. et al.            | 2.0 | 1.3 | 3.1  |
|                                  | Nikpouraghdam M. et al.    | 1.2 | 0.7 | 2.2  |
|                                  | Tomlins J. et al.          | 2.9 | 1.3 | 6.6  |
|                                  | D+L pooled                 | 2.2 | 1.7 | 2.9  |
| <hr/>                            |                            |     |     |      |
| Diseases of liver                |                            |     |     |      |
|                                  | Guan, W. et al.            | 1.1 | 0.2 | 8.0  |
|                                  | Wang Dawei et al.          | 0.9 | 0.1 | 5.9  |
|                                  | Yao Q. et al.              | 4.8 | 1.1 | 21.5 |
|                                  | D+L pooled                 | 1.9 | 0.6 | 6.4  |
| <hr/>                            |                            |     |     |      |
| Diseases of the digestive system |                            |     |     |      |
|                                  | Zhang Jixiang. et al.      | 0.8 | 0.1 | 6.1  |
|                                  | D+L pooled                 | 0.8 | 0.1 | 6.1  |
| <hr/>                            |                            |     |     |      |
| Endocrine diseases               |                            |     |     |      |
|                                  | Zhang Jixiang. et al.      | 1.2 | 0.4 | 3.9  |
|                                  | D+L pooled                 | 1.2 | 0.4 | 3.9  |
| <hr/>                            |                            |     |     |      |
| Hypertension                     |                            |     |     |      |
|                                  | Cao, J. et al.             | 3.3 | 1.5 | 7.5  |
|                                  | Chen, T. et al.            | 1.8 | 1.4 | 2.3  |
|                                  | Deng G. et al.             | 4.5 | 3.7 | 5.4  |
|                                  | Fan J. et al.              | 1.1 | 0.2 | 6.4  |
|                                  | Guan, W. et al.            | 6.3 | 3.6 | 10.8 |
|                                  | Li, Y. et al.              | 2.9 | 0.6 | 14.9 |
|                                  | The Novel Coronavirus Team | 2.9 | 2.5 | 3.4  |
|                                  | Wang Dawei et al.          | 3.5 | 1.6 | 7.6  |
|                                  | Wang, L. et al.            | 1.4 | 0.9 | 2.2  |
|                                  | Wang, Y. et al.            | 1.6 | 1.2 | 2.0  |
|                                  | Wu, C. et al.              | 2.4 | 1.4 | 3.9  |
|                                  | Yao Q. et al.              | 8.1 | 2.9 | 22.3 |
|                                  | Yuan, M. et al.            | 3.8 | 1.8 | 8.3  |
|                                  | Zhang Y. et al.            | 5.6 | 0.5 | 58.8 |
|                                  | Zhou, F. et al.            | 2.1 | 1.4 | 3.3  |
|                                  | Nikpouraghdam M. et al.    | 1.7 | 0.9 | 3.3  |
|                                  | Tomlins J. et al.          | 2.1 | 1.0 | 4.6  |
|                                  | D+L pooled                 | 2.7 | 2.1 | 3.4  |

| Myocardial infarction                 |                            |      |     |      |
|---------------------------------------|----------------------------|------|-----|------|
|                                       | Wu, C. et al.              | 2.4  | 1.1 | 5.1  |
|                                       | Yang, X. et al.            | 1.0  | 0.5 | 2.1  |
|                                       | Yuan, M. et al.            | 2.9  | 1.4 | 5.9  |
|                                       | Guo, T. et al.             | 6.7  | 3.7 | 12.0 |
|                                       | Shi, S. et al.             | 11.4 | 6.7 | 19.5 |
|                                       | D+L pooled                 | 3.6  | 1.5 | 8.6  |
| Other diseases or unspecified disease |                            |      |     |      |
|                                       | Ruan, Q. et al.            | 1.6  | 1.1 | 2.4  |
|                                       | Tang, N. et al.            | 1.9  | 0.9 | 4.3  |
|                                       | D+L pooled                 | 1.7  | 1.2 | 2.4  |
| Other respiratory disease             |                            |      |     |      |
|                                       | Chen, T. et al.            | 1.5  | 1.0 | 2.3  |
|                                       | Deng G. et al.             | 3.4  | 2.4 | 4.9  |
|                                       | The Novel Coronavirus Team | 2.8  | 2.0 | 3.9  |
|                                       | Yang, X. et al.            | 0.8  | 0.3 | 2.2  |
|                                       | Zhang Jixiang. et al.      | 3.0  | 1.2 | 7.7  |
|                                       | Cao, J. et al.             | 1.8  | 0.6 | 5.3  |
|                                       | Nikpouraghdam M. et al.    | 1.9  | 1.0 | 3.5  |
|                                       | D+L pooled                 | 2.2  | 1.5 | 3.0  |

## 9. Meta-analysis of Epidemiologic Factors and hospitalisation

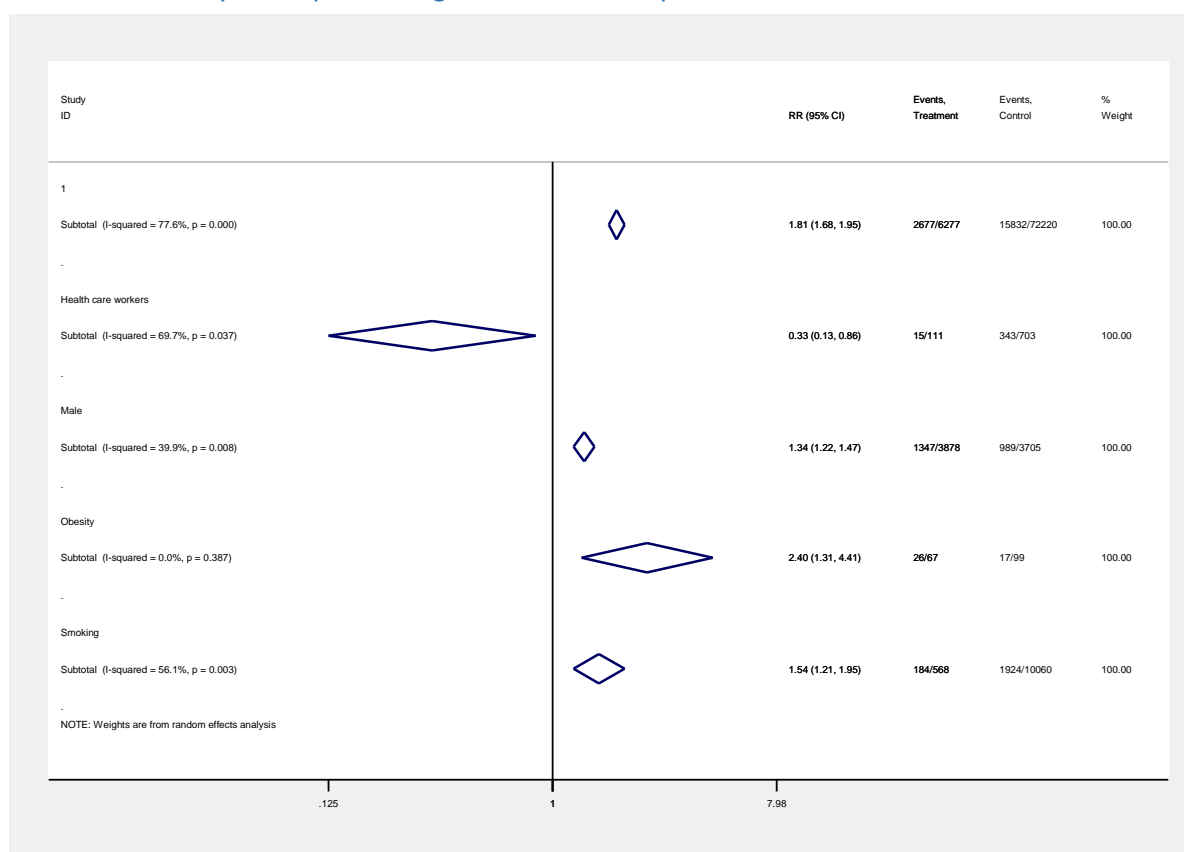

| Epidemiologic Factor | Study        | RR  | [95% Conf. Interval] |     |
|----------------------|--------------|-----|----------------------|-----|
| Health care workers  | Li X. et al. | 0.4 | 0.2                  | 0.7 |

|         |                       |     |     |      |
|---------|-----------------------|-----|-----|------|
|         | Duanmu Y. et al.      | 0.8 | 0.3 | 2.2  |
|         | McMichael, T. et al.  | 0.1 | 0.0 | 0.3  |
|         | D+L pooled            | 0.3 | 0.1 | 0.9  |
| <hr/>   |                       |     |     |      |
| Male    |                       |     |     |      |
|         | Cai, Q. et al.        | 2.2 | 1.3 | 3.6  |
|         | Chen Q. et al.        | 1.0 | 0.6 | 1.6  |
|         | Chen, G. et al.       | 2.4 | 0.4 | 13.5 |
|         | Deng Q. et al.        | 1.3 | 0.9 | 1.7  |
|         | Feng, Y. et al.       | 1.4 | 1.0 | 2.0  |
|         | Ji D. et al.          | 1.8 | 1.0 | 3.4  |
|         | Ji Dong. et al.       | 1.8 | 1.0 | 3.3  |
|         | Li K. et al.          | 1.3 | 0.7 | 2.6  |
|         | Li X. et al.          | 1.3 | 1.1 | 1.5  |
|         | Li, Y. et al.         | 2.2 | 0.7 | 6.8  |
|         | Liu, J. et al.        | 1.9 | 0.8 | 4.7  |
|         | Liu, J. et al.        | 1.4 | 0.6 | 3.2  |
|         | Ma J. et al.          | 0.9 | 0.5 | 1.5  |
|         | Mao, L. et al.        | 1.5 | 1.1 | 2.0  |
|         | Qin, C. et al.        | 1.1 | 0.9 | 1.3  |
|         | Shi, Y. et al.        | 2.4 | 1.3 | 4.5  |
|         | Sun S. et al.         | 3.5 | 1.7 | 7.1  |
|         | Tian, S. et al.       | 1.4 | 0.8 | 2.3  |
|         | Wan, S. et al.        | 1.0 | 0.6 | 1.6  |
|         | Wang, X. et al.       | 1.5 | 1.0 | 2.2  |
|         | Wei X. et al.         | 1.3 | 1.0 | 1.7  |
|         | Wei YY. et al.        | 1.5 | 0.8 | 3.0  |
|         | Xie, H. et al.        | 1.4 | 0.8 | 2.7  |
|         | Xu, Y. et al.         | 0.8 | 0.3 | 2.2  |
|         | Yao Q. et al.         | 1.3 | 0.5 | 3.6  |
|         | Yu X. et al.          | 2.0 | 1.0 | 4.2  |
|         | Zhang G. et al.       | 1.8 | 1.1 | 3.0  |
|         | Zhang Jixiang. et al. | 1.1 | 1.0 | 1.2  |
|         | Zhang Y. et al.       | 0.9 | 0.4 | 1.7  |
|         | Zhang, J. et al.      | 1.3 | 0.9 | 1.9  |
|         | Zhang, J. et al.      | 1.2 | 0.4 | 3.7  |
|         | Zhao X. et al.        | 0.8 | 0.4 | 1.3  |
|         | Zheng S. et al.       | 1.3 | 1.0 | 1.7  |
|         | Zheng, F. et al.      | 0.9 | 0.5 | 1.7  |
|         | Zhu, Z. et al.        | 2.3 | 0.9 | 5.9  |
|         | Zou Y. et al.         | 3.1 | 1.3 | 7.4  |
|         | D+L pooled            | 1.3 | 1.2 | 1.5  |
| <hr/>   |                       |     |     |      |
| Obesity |                       |     |     |      |
|         | Zheng KI. et al.      | 4.0 | 1.0 | 15.6 |
|         | Duanmu Y. et al.      | 2.1 | 1.1 | 4.2  |
|         | D+L pooled            | 2.4 | 1.3 | 4.4  |
| <hr/>   |                       |     |     |      |
| Smoking |                       |     |     |      |
|         | Chen Q. et al.        | 0.7 | 0.2 | 1.8  |
|         | Feng, Y. et al.       | 1.5 | 1.0 | 2.3  |
|         | Ji D. et al.          | 1.8 | 0.8 | 3.6  |
|         | Ji Dong. et al.       | 1.1 | 0.4 | 2.8  |
|         | Li X. et al.          | 1.2 | 1.0 | 1.4  |
|         | Li, Y. et al.         | 3.2 | 1.2 | 8.6  |

|                   |     |     |      |
|-------------------|-----|-----|------|
| Liu, J. et al.    | 1.3 | 0.4 | 4.1  |
| Liu, J. et al.    | 1.9 | 0.7 | 5.6  |
| Liu, W. et al.    | 5.5 | 2.1 | 14.4 |
| Qin, C. et al.    | 0.7 | 0.3 | 1.6  |
| Shi, Y. et al.    | 1.6 | 0.7 | 3.4  |
| Wan, S. et al.    | 0.4 | 0.1 | 2.3  |
| Yu X. et al.      | 1.2 | 0.6 | 2.4  |
| Zhang, J. et al.  | 1.1 | 0.5 | 2.3  |
| Zou Y. et al.     | 1.7 | 0.5 | 6.6  |
| Duanmu Y. et al.  | 3.7 | 2.0 | 6.8  |
| CDC COVID-19 Team | 1.8 | 1.5 | 2.3  |
| D+L pooled        | 1.5 | 1.2 | 1.9  |

## 10. Meta-analysis of Epidemiologic Factors and ICU admission

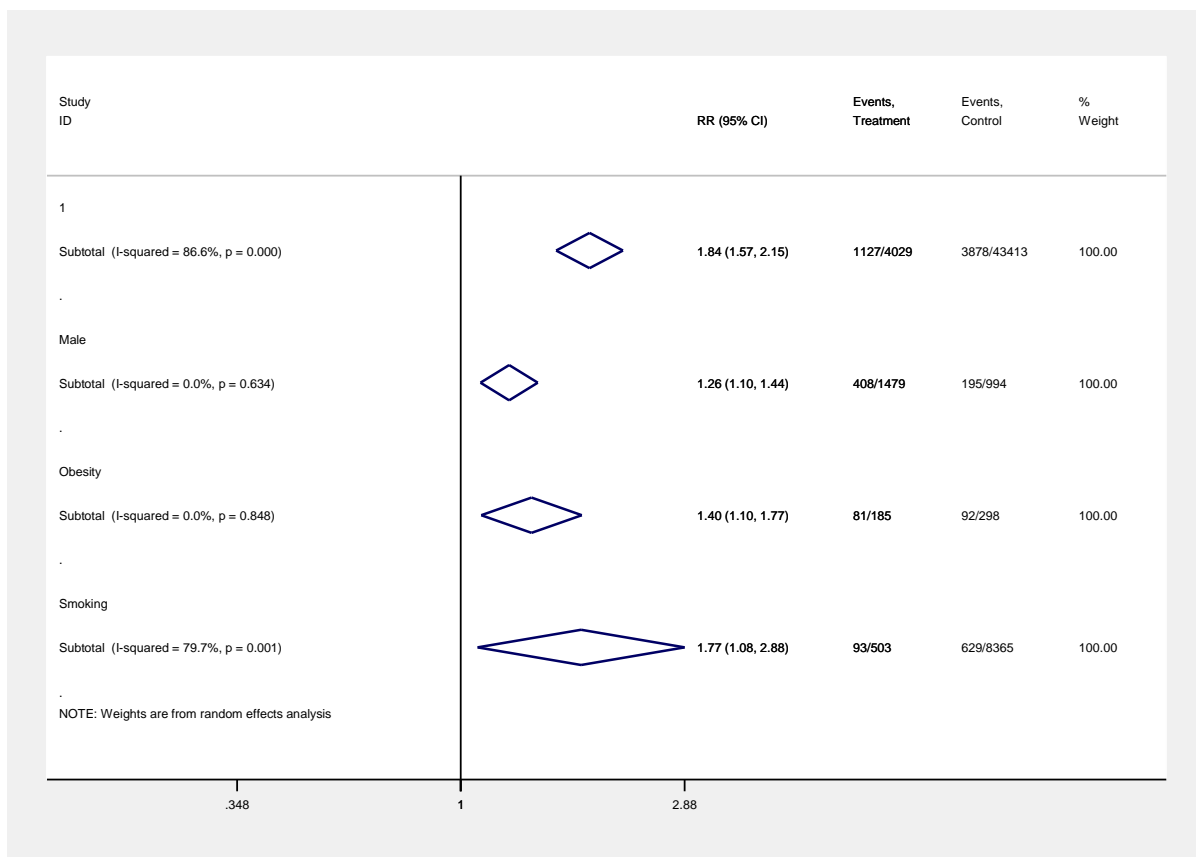

| Epidemiologic Factor | Study              | RR    | [95% Conf. Interval] |       |
|----------------------|--------------------|-------|----------------------|-------|
| Male                 | Du, R. et al.      | 1.135 | 0.725                | 1.778 |
|                      | Guan, W. et al.    | 1.474 | 0.898                | 2.419 |
|                      | Huang, C. et al.   | 2.017 | 0.529                | 7.693 |
|                      | Lei, S. et al.     | 0.714 | 0.312                | 1.635 |
|                      | Liu, Y. et al.     | 0.949 | 0.645                | 1.396 |
|                      | Wang R. et al.     | 1.352 | 0.648                | 2.823 |
|                      | Wang, D. et al.    | 1.32  | 0.739                | 2.358 |
|                      | Wu, C. et al.      | 1.426 | 0.979                | 2.077 |
|                      | Simonnet A. et al. | 1.2   | 0.9                  | 1.5   |
|                      | Goyal, P. et al.   | 1.6   | 1.1                  | 2.2   |

|                |                      |     |     |     |
|----------------|----------------------|-----|-----|-----|
|                | Kalligeros M. et al. | 1.2 | 0.8 | 2.0 |
|                | D+L pooled           | 1.3 | 1.1 | 1.4 |
| <b>Obesity</b> |                      |     |     |     |
|                | Goyal, P. et al.     | 1.4 | 1.0 | 1.8 |
|                | Kalligeros M. et al. | 1.5 | 0.9 | 2.3 |
|                | D+L pooled           | 1.4 | 1.1 | 1.8 |
| <b>Smoking</b> |                      |     |     |     |
|                | Guan, W. et al.      | 2.9 | 1.8 | 4.8 |
|                | Wang R. et al.       | 2.6 | 1.3 | 5.3 |
|                | Goyal, P. et al.     | 0.9 | 0.5 | 1.8 |
|                | Kalligeros M. et al. | 1.0 | 0.6 | 1.5 |
|                | CDC COVID-19 Team    | 2.4 | 1.8 | 3.3 |
|                | D+L pooled           | 1.8 | 1.1 | 2.9 |

## 11. Meta-analysis of Epidemiologic Factors and death

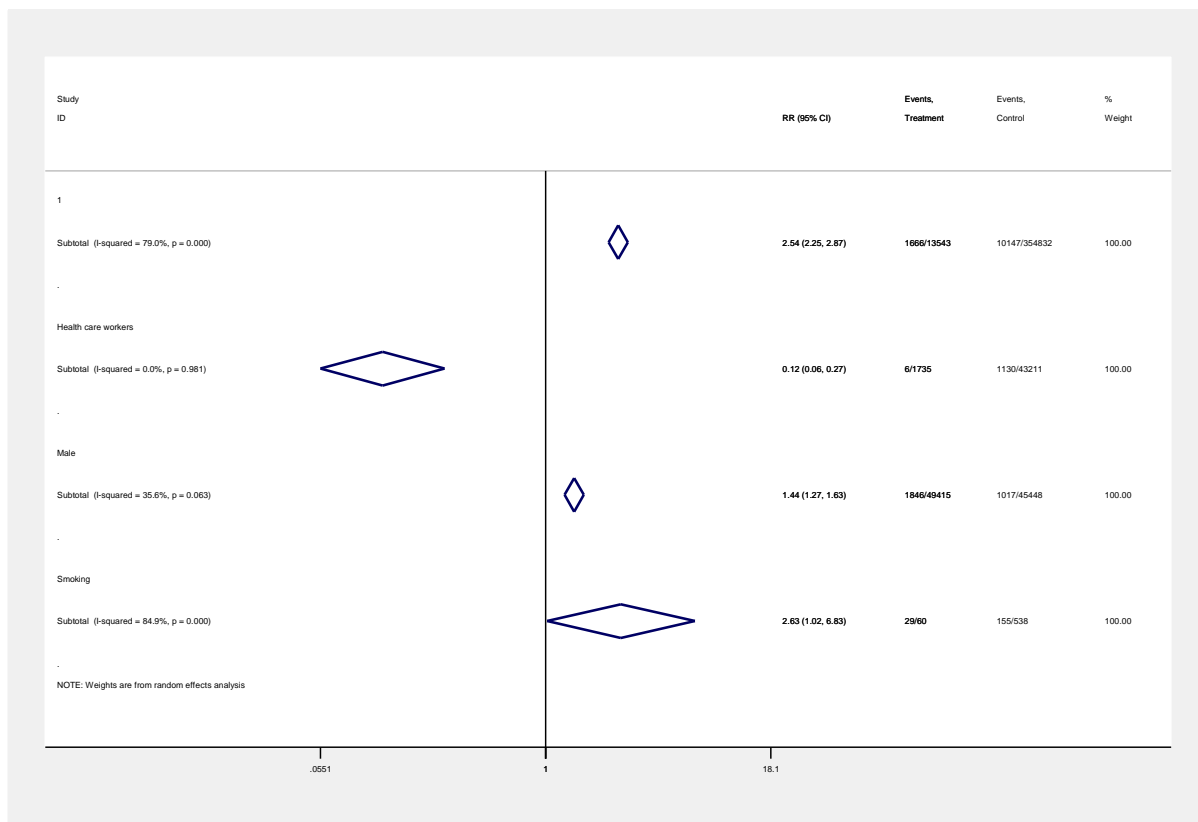

| Epidemiologic Factor       | Study                      | RR  | [95% Conf. Interval] |      |
|----------------------------|----------------------------|-----|----------------------|------|
| <b>Health care workers</b> |                            |     |                      |      |
|                            | Chen, T. et al.            | 0.1 | 0.0                  | 0.8  |
|                            | The Novel Coronavirus Team | 0.1 | 0.1                  | 0.3  |
|                            | D+L pooled                 | 0.1 | 0.1                  | 0.3  |
| <b>Male</b>                |                            |     |                      |      |
|                            | Cao, J. et al.             | 1.8 | 0.8                  | 4.5  |
|                            | Chen, T. et al.            | 1.7 | 1.2                  | 2.3  |
|                            | Deng G. et al.             | 1.6 | 1.5                  | 1.9  |
|                            | Fan J. et al.              | 0.9 | 0.2                  | 5.3  |
|                            | Li, Y. et al.              | 4.3 | 0.6                  | 33.5 |

|         |                            |     |     |      |
|---------|----------------------------|-----|-----|------|
|         | Tang, N. et al.            | 2.8 | 1.1 | 7.3  |
|         | The Novel Coronavirus Team | 1.7 | 1.5 | 1.9  |
|         | Wang Dawei et al.          | 4.7 | 1.4 | 15.1 |
|         | Wang, L. et al.            | 1.6 | 1.0 | 2.4  |
|         | Wang, Y. et al.            | 1.2 | 0.9 | 1.5  |
|         | Wu, C. et al.              | 1.1 | 0.6 | 1.9  |
|         | Yang, X. et al.            | 0.9 | 0.6 | 1.4  |
|         | Yao Q. et al.              | 2.1 | 0.7 | 6.2  |
|         | Yuan, M. et al.            | 0.8 | 0.3 | 2.3  |
|         | Zhang Jixiang. et al.      | 1.6 | 0.7 | 3.5  |
|         | Zhang Y. et al.            | 0.7 | 0.1 | 7.5  |
|         | Zhou, F. et al.            | 1.4 | 0.9 | 2.4  |
|         | Nikpouraghdam M. et al.    | 1.2 | 0.9 | 1.6  |
|         | Tomlins J. et al.          | 0.9 | 0.4 | 1.9  |
|         | D+L pooled                 | 1.4 | 1.3 | 1.6  |
| <hr/>   |                            |     |     |      |
| Smoking |                            |     |     |      |
|         | Chen, T. et al.            | 1.2 | 0.8 | 1.7  |
|         | Li, Y. et al.              | 3.9 | 0.8 | 18.4 |
|         | Yao Q. et al.              | 8.7 | 3.7 | 20.1 |
|         | Zhou, F. et al.            | 1.7 | 0.8 | 3.3  |
|         | D+L pooled                 | 2.6 | 1.0 | 6.8  |

## 12. References

1. Cai Q, Huang D, Ou P, Yu H, Zhu Z, Xia Z, et al. COVID-19 in a Designated Infectious Diseases Hospital Outside Hubei Province, China. *Allergy* [Internet]. 2020/04/03. 2020;00:1–11. Available from: <https://onlinelibrary.wiley.com/doi/epdf/10.1111/all.14309>
2. Cao J, Tu W, Cheng W, Yu L, Liu Y, Hu X, et al. Clinical Features and Short-term Outcomes of 102 Patients with Corona Virus Disease 2019 in Wuhan, China. *Clin Infect Dis* [Internet]. 2020; Available from: <https://academic.oup.com/cid/advance-article/doi/10.1093/cid/ciaa243/5814897>
3. CDC COVID-19 Response Team. Preliminary Estimates of the Prevalence of Selected Underlying Health Conditions Among Patients with Coronavirus Disease 2019 — United States, February 12–March 28, 2020. *MMWR Morb Mortal Wkly Rep*. 2020;69(13):382–386.
4. Chen G, Zhao J, Ning Q. Clinical and immunological features of severe and moderate coronavirus disease 2019. *J Clin Invest* [Internet]. 2020; Available from: <https://www.jci.org/articles/view/137244/pdf>
5. Chen Q, Zheng Z, Zhang C, Zhang X, Wu H, Wang J, et al. Clinical characteristics of 145 patients with corona virus disease 2019 (COVID-19) in Taizhou, Zhejiang, China. *Infection* [Internet]. 2020/04/29. 2020; Available from: <https://www.ncbi.nlm.nih.gov/pubmed/32342479>
6. Chen T, Wu D, Chen H, Yan W, Yang D, Chen G, et al. Clinical characteristics of 113 deceased patients with coronavirus disease 2019: retrospective study. *BMJ*. 2020;368.
7. Cheng Y, Luo R, Wang K, Zhang M, Wang Z, Dong L, et al. Kidney disease is associated with in-hospital death of patients with COVID-19. *Kidney Int* [Internet]. 2020/04/06. 2020; Available from: [https://www.kidney-international.org/article/S0085-2538\(20\)30255-6/fulltext](https://www.kidney-international.org/article/S0085-2538(20)30255-6/fulltext)
8. Deng G, Yin M, Chen X, Zeng F. Clinical determinants for fatality of 44,672 patients with COVID-19. *Crit Care* [Internet]. 2020/04/30. 2020;24(1):179. Available from: <https://www.ncbi.nlm.nih.gov/pubmed/32345311>
9. Deng Q, Hu B, Zhang Y, Wang H, Zhou X, Hu W, et al. Suspected myocardial injury in patients with COVID-19: Evidence from front-line clinical observation in Wuhan, China. *Int J Cardiol*



- [Internet]. 2020/04/16. 2020; Available from:  
<https://www.ncbi.nlm.nih.gov/pubmed/32291207>
10. Du R, Liu L, Yin W, Wang W, Guan L, Yuan M, et al. Hospitalization and Critical Care of 109 Decedents with COVID-19 Pneumonia in Wuhan, China. *Ann Am Thorac Soc* [Internet]. 2020; Available from: <https://www.atsjournals.org/doi/abs/10.1513/AnnalsATS.202003-225OC>
  11. Duanmu Y, Brown IP, Gibb WR, Singh J, Matheson LW, Blomkalns AL, et al. Characteristics of Emergency Department Patients With COVID-19 at a Single Site in Northern California: Clinical Observations and Public Health Implications. *Acad Emerg Med* [Internet]. 2020/04/29. 2020; Available from: <https://www.ncbi.nlm.nih.gov/pubmed/32344458>
  12. Fan J, Wang H, Ye G, Cao X, Xu X, Tan W, et al. Low-density lipoprotein is a potential predictor of poor prognosis in patients with coronavirus disease 2019. *Metabolism* [Internet]. 2020/04/23. 2020;154243. Available from: <https://www.ncbi.nlm.nih.gov/pubmed/32320740>
  13. Feng Y, Ling Y, Bai T, Xie Y, Huang J, Li J, et al. COVID-19 with Different Severity: A Multi-center Study of Clinical Features. *Am J Respir Crit Care Med* [Internet]. 2020/04/11. 2020; Available from: <https://www.ncbi.nlm.nih.gov/pubmed/32275452>
  14. Goyal P, Choi JJ, Pinheiro LC, Schenck EJ, Chen R, Jabri A, et al. Clinical Characteristics of Covid-19 in New York City. *N Engl J Med* [Internet]. 2020/04/18. 2020; Available from: <https://www.ncbi.nlm.nih.gov/pubmed/32302078>
  15. Guan W, Liang W, Zhao Y, Liang H, Chen Z, Li Y, et al. Comorbidity and its impact on 1590 patients with Covid-19 in China: A Nationwide Analysis. *Eur Respir J* [Internet]. 2020 Mar 26;2000547. Available from: <http://erj.ersjournals.com/lookup/doi/10.1183/13993003.00547-2020>
  16. Guan W, Ni Z, Hu Y, Liang W, Ou C, He J, et al. Clinical Characteristics of Coronavirus Disease 2019 in China. *N Engl J Med* [Internet]. 2020; Available from: <https://www.nejm.org/doi/full/10.1056/NEJMoa2002032>
  17. Guo T, Fan Y, Chen C, Wu X, Zhang L, He T, et al. Cardiovascular Implications of Fatal Outcomes of Patients With Coronavirus Disease 2019 (COVID-19). *JAMA Cardiol* [Internet]. 2020; Available from: <https://www.ncbi.nlm.nih.gov/pmc/articles/PMC7101506/>
  18. Huang C, Wang Y, Li X, Ren L, Zhao J, Hu Y, et al. Clinical features of patients infected with 2019 novel coronavirus in Wuhan, China. *Lancet* [Internet]. 2020;395:497–506. Available from: [https://www.thelancet.com/journals/lancet/article/PIIS0140-6736\(20\)30183-5/fulltext](https://www.thelancet.com/journals/lancet/article/PIIS0140-6736(20)30183-5/fulltext)
  19. Ji D, Zhang D, Xu J, Chen Z, Yang T, Zhao P, et al. Prediction for Progression Risk in Patients with COVID-19 Pneumonia: the CALL Score. *Clin Infect Dis* [Internet]. 2020/04/10. 2020; Available from: <https://www.ncbi.nlm.nih.gov/pubmed/32271369>
  20. Ji D, Qin E, Xu J, Zhang D, Cheng G, Wang Y, et al. Implication of non-alcoholic fatty liver diseases (NAFLD) in patients with COVID-19: a preliminary analysis. *J Hepatol* [Internet]. 2020/04/12. 2020; Available from: <https://www.ncbi.nlm.nih.gov/pubmed/32278005>
  21. Kalligeros M, Shehadeh F, Mylona EK, Benitez G, Beckwith CG, Chan PA, et al. Association of Obesity with Disease Severity among Patients with COVID-19. *Obes (Silver Spring)* [Internet]. 2020/05/01. 2020; Available from: <https://www.ncbi.nlm.nih.gov/pubmed/32352637>
  22. Lei S, Jiang F, Su W, Chen C, Chen J, Mei W, et al. Clinical characteristics and outcomes of patients undergoing surgeries during the incubation period of COVID-19 infection. *EclinicalMedicine* [Internet]. 2020/04/16. 2020;100331. Available from: <https://www.ncbi.nlm.nih.gov/pubmed/32292899>
  23. Li K, Wu J, Wu F, Guo D, Chen L, Fang Z, et al. The Clinical and Chest CT Features Associated with Severe and Critical COVID-19 Pneumonia. *Invest Radiol* [Internet]. 2020/03/03. 2020; Available from: <https://www.ncbi.nlm.nih.gov/pubmed/32118615>
  24. Li X, Xu S, Yu M, Wang K, Tao Y, Zhou Y, et al. Risk factors for severity and mortality in adult COVID-19 inpatients in Wuhan. *J Allergy Clin Immunol* [Internet]. 2020/04/16. 2020; Available from: <https://www.ncbi.nlm.nih.gov/pubmed/32294485>
  25. Li Y, Peng S, Li L, Wang Q, Ping W, Zhang N, et al. Clinical and Transmission Characteristics of Covid-19 - A Retrospective Study of 25 Cases From a Single Thoracic Surgery Department .

- Curr Med Sci [Internet]. 2020; Available from: [https://pubmed.ncbi.nlm.nih.gov/32232652/?from\\_term=covid+19+and+cases&from\\_sort=date&from\\_pos=3](https://pubmed.ncbi.nlm.nih.gov/32232652/?from_term=covid+19+and+cases&from_sort=date&from_pos=3)
26. Liang W, Guan W, Chen R, Wang W, Li J, Xu K, et al. Cancer patients in SARS-CoV-2 infection: a nationwide analysis in China. *Lancet Oncol* [Internet]. 2020/02/19. 2020;21(3):335–7. Available from: <https://www.ncbi.nlm.nih.gov/pubmed/32066541>
  27. Liu J, Li S, Liu J, Liang B, Wang X, Wang H, et al. Longitudinal characteristics of lymphocyte responses and cytokine profiles in the peripheral blood of SARS-CoV-2 infected patients [Internet]. *EBioMedicine*. 2020. Available from: <https://www.medrxiv.org/content/10.1101/2020.02.16.20023671v2>
  28. Liu J, Liu Y, Xiang P, Pu L, Xiong H, Li C, et al. Neutrophil-to-Lymphocyte Ratio Predicts Severe Illness Patients with 2019 Novel Coronavirus in the Early Stage [Internet]. *medRxiv*. 2020. Available from: <https://www.medrxiv.org/content/10.1101/2020.02.10.20021584v1>
  29. Liu W, Tao Z, Wang L, Yuan M, Liu K, Zhou L, et al. Analysis of factors associated with disease outcomes in hospitalized patients with 2019 novel coronavirus disease. *Chin Med J (Engl)*. 2020;
  30. Liu Y, Sun W, Li J, Chen L, Wang Y, Zhang L, et al. Clinical features and progression of acute respiratory distress syndrome in coronavirus disease 2019 [Internet]. *medRxiv*. 2020. Available from: <https://www.medrxiv.org/content/10.1101/2020.02.17.20024166v3>
  31. Ma J, Yin J, Qian Y, Wu Y. Clinical Characteristics and Prognosis in Cancer Patients with COVID-19: a Single Center’s Retrospective Study. *J Infect* [Internet]. 2020/04/17. 2020; Available from: <https://www.ncbi.nlm.nih.gov/pubmed/32298677>
  32. Mao L, Jin H, Wang M, Hu Y, Chen S, He Q, et al. Neurologic Manifestations of Hospitalized Patients With Coronavirus Disease 2019 in Wuhan, China. *JAMA Neurol* [Internet]. 2020/04/11. 2020; Available from: <https://www.ncbi.nlm.nih.gov/pubmed/32275288>
  33. McMichael T, Currie D, Clark S, Pogojans S, Kay M, Schwartz N, et al. Epidemiology of Covid-19 in a Long-Term Care Facility in King County, Washington. *new engl J Med*. 2020;
  34. Nikpouraghdam M, Jalali Farahani A, Alishiri G, Heydari S, Ebrahimnia M, Samadinia H, et al. Epidemiological characteristics of coronavirus disease 2019 (COVID-19) patients in IRAN: A single center study. *J Clin Virol* [Internet]. 2020/05/01. 2020;127:104378. Available from: <https://www.ncbi.nlm.nih.gov/pubmed/32353762>
  35. Qin C, Zhou L, Hu Z, Zhang S, Yang S, Tao Y, et al. Dysregulation of immune response in patients with COVID-19 in Wuhan, China. *Clin Infect Dis*. 2020;
  36. Ruan Q, Yang K, Wang W, Jiang L, Song J. Clinical predictors of mortality due to COVID-19 based on an analysis of data of 150 patients from Wuhan, China. *Intensive Care Med* [Internet]. 2020/03/04. 2020; Available from: <https://www.ncbi.nlm.nih.gov/pubmed/32125452>
  37. Shi S, Qin M, Shen B, Cai Y, Liu T, Yang F, et al. Association of Cardiac Injury With Mortality in Hospitalized Patients With COVID-19 in Wuhan, China. *JAMA Cardiol*. 2020/03/27. 2020;
  38. Shi Y, Yu X, Zhao H, Wang H, Zhao R, Sheng J. Host susceptibility to severe COVID-19 and establishment of a host risk score: findings of 487 cases outside Wuhan. *Crit Care*. 2020;24.
  39. Simonnet A, Chetboun M, Poissy J, Raverdy V, Noulette J, Duhamel A, et al. High prevalence of obesity in severe acute respiratory syndrome coronavirus-2 (SARS-CoV-2) requiring invasive mechanical ventilation. *Obes (Silver Spring)* [Internet]. 2020/04/10. 2020; Available from: <https://www.ncbi.nlm.nih.gov/pubmed/32271993>
  40. Sun S, Cai X, Wang H, He G, Lin Y, Lu B, et al. Abnormalities of peripheral blood system in patients with COVID-19 in Wenzhou, China. *Clin Chim Acta* [Internet]. 2020/04/28. 2020;507:174–80. Available from: <https://www.ncbi.nlm.nih.gov/pubmed/32339487>
  41. Tang N, Li D, Wang X, Sun Z. Abnormal coagulation parameters are associated with poor prognosis in patients with novel coronavirus pneumonia. *J Thromb Haemost* [Internet]. 2020;18:844–847. Available from: <https://onlinelibrary.wiley.com/doi/10.1111/jth.14768>
  42. Novel Coronavirus Pneumonia Emergency Response Epidemiology Team. The epidemiological

- characteristics of an outbreak of 2019 novel coronavirus diseases (COVID-19) - China, 2020. *China CDC Wkly* [Internet]. 2020/02/18. 2020;2. Available from: <https://www.ncbi.nlm.nih.gov/pubmed/32064853>
43. Tian S, Hu N, Lou J, Chen K, Kang X, Xiang Z, et al. Characteristics of COVID-19 infection in Beijing. *J Infect* [Internet]. 2020/03/01. 2020; Available from: <https://www.ncbi.nlm.nih.gov/pubmed/32112886>
  44. Tomlins J, Hamilton F, Gunning S, Sheehy C, Moran E, Macgowan A. Clinical features of 95 sequential hospitalised patients with novel coronavirus 2019 disease (COVID-19), the first UK cohort. *J Infect* [Internet]. 2020/05/01. 2020; Available from: <https://www.ncbi.nlm.nih.gov/pubmed/32353384>
  45. Wan S, Xiang Y, Fang W, Zheng Y, Li B, Hu Y, et al. Clinical features and treatment of COVID-19 patients in northeast Chongqing. *J Med Virol* [Internet]. 2020;1–10. Available from: <https://onlinelibrary.wiley.com/doi/full/10.1002/jmv.25783>
  46. Wang D, Yin Y, Hu C, Liu X, Zhang X, Zhou S, et al. Clinical course and outcome of 107 patients infected with the novel coronavirus, SARS-CoV-2, discharged from two hospitals in Wuhan, China. *Crit Care* [Internet]. 2020/05/02. 2020;24(1):188. Available from: <https://www.ncbi.nlm.nih.gov/pubmed/32354360>
  47. Wang D, Hu B, Hu C, Zhu F, Liu X, Zhang J, et al. Clinical Characteristics of 138 Hospitalized Patients With 2019 Novel Coronavirus–Infected Pneumonia in Wuhan, China. *JAMA* [Internet]. 2020 Mar 17;323(11):1061. Available from: <https://jamanetwork.com/journals/jama/fullarticle/2761044>
  48. Wang L, He W, Yu X, Hu D, Bao M, Liu H, et al. Coronavirus Disease 2019 in elderly patients: characteristics and prognostic factors based on 4-week follow-up. *J Infect* [Internet]. 2020/04/03. 2020; Available from: <https://www.sciencedirect.com/science/article/pii/S0163445320301468>
  49. Wang R, Pan M, Zhang X, Fan X, Han M, Zhao F, et al. Epidemiological and clinical features of 125 Hospitalized Patients with COVID-19 in Fuyang, Anhui, China. *Int J Infect Dis* [Internet]. 2020/04/15. 2020; Available from: <https://www.sciencedirect.com/science/article/pii/S1201971220302034>
  50. Wang X, Fang J, Zhu Y, Chen L, Ding F, Zhou R, et al. Clinical characteristics of non-critically ill patients with novel coronavirus infection (COVID-19) in a Fangcang Hospital. *Clin Microbiol Infect* [Internet]. 2020/04/07. 2020; Available from: [https://www.clinicalmicrobiologyandinfection.com/article/S1198-743X\(20\)30177-4/fulltext](https://www.clinicalmicrobiologyandinfection.com/article/S1198-743X(20)30177-4/fulltext)
  51. Wang Y, Lu X, Chen H, Chen T, Su N, Huang F, et al. Clinical Course and Outcomes of 344 Intensive Care Patients with COVID-19 [Internet]. *American Journal of Respiratory and Critical Care Medicine*. 2020. Available from: <https://www.atsjournals.org/doi/10.1164/rccm.202003-0736LE>
  52. Wei X, Su J, Yang K, Wei J, Wan H, Cao X, et al. Elevations of serum cancer biomarkers correlate with severity of COVID-19. *J Med Virol* [Internet]. 2020/04/30. 2020; Available from: <https://www.ncbi.nlm.nih.gov/pubmed/32347972>
  53. Wei YY, Wang RR, Zhang DW, Tu YH, Chen CS, Ji S, et al. Risk factors for severe COVID-19: evidence from 167 hospitalized patients in Anhui, China. *J Infect* [Internet]. 2020/04/20. 2020; Available from: <https://www.ncbi.nlm.nih.gov/pubmed/32305487>
  54. Williamson E., Walker AJ., Bhaskaran KJ., Bacon S., Bates C., Morton CE., et al. OpenSAFELY: factors associated with COVID-19-related hospital death in the linked electronic health records of 17 million adult NHS patients [Internet]. *Laboratory CSH*, editor. 2020. Available from: <https://www.phc.ox.ac.uk/publications/1103408>
  55. Wu C, Chen X, Cai Y, Xia J, Zhou X, Xu S, et al. Risk Factors Associated With Acute Respiratory Distress Syndrome and Death in Patients With Coronavirus Disease 2019 Pneumonia in Wuhan, China. *JAMA Intern Med*. 2020;
  56. Xiao G, Hu H, Wu F, Sha T, Huang Q, Li H, et al. Acute kidney injury in patients hospitalized with COVID-19 in Wuhan, China: A single-center retrospective observational study [Internet].

- medRxiv. 2020. Available from:  
<https://www.medrxiv.org/content/10.1101/2020.04.06.20055194v1>
57. Xie H, Zhao J, Lian N, Lin S, Xie Q, Zhuo H. Clinical characteristics of Non-ICU hospitalized patients with coronavirus disease 2019 and liver injury : A Retrospective study [Internet]. *Liver International*. 2020. Available from:  
<https://onlinelibrary.wiley.com/doi/abs/10.1111/liv.14449>
  58. Xu Y, Dong J, An W, Lv X, Yin X, Zhang J, et al. Clinical and computed tomographic imaging features of novel coronavirus pneumonia caused by SARS-CoV-2. *J Infect* [Internet]. 2020; Available from: <https://pubmed.ncbi.nlm.nih.gov/32109443/>
  59. Yan Y, Yang Y, Wang F, Ren H, Zhang S, Shi X, et al. Clinical characteristics and outcomes of patients with severe covid-19 with diabetes. *BMJ Open Diab Res Care* [Internet]. 2020;8:e001343. Available from: <https://drc.bmj.com/content/bmjdr/8/1/e001343.full.pdf>
  60. Yang X, Yu Y, Xu J, Shu H, Xia J, Liu H, et al. Clinical course and outcomes of critically ill patients with SARS-CoV-2 pneumonia in Wuhan, China: a single-centered, retrospective, observational study. *Lancet Respir Med* [Internet]. 2020/02/28. 2020; Available from:  
<https://www.ncbi.nlm.nih.gov/pubmed/32105632>
  61. Yao Q, Wang P, Wang X, Qie G, Meng M, Tong X, et al. Retrospective study of risk factors for severe SARS-Cov-2 infections in hospitalized adult patients. *Pol Arch Intern Med* [Internet]. 2020/04/25. 2020; Available from: <https://www.ncbi.nlm.nih.gov/pubmed/32329978>
  62. Yu X, Sun S, Shi Y, Wang H, Zhao R, Sheng J. SARS-CoV-2 viral load in sputum correlates with risk of COVID-19 progression. *Crit Care* [Internet]. 2020/04/25. 2020;24(1):170. Available from: <https://www.ncbi.nlm.nih.gov/pubmed/32326952>
  63. Yuan M, Yin W, Tao Z, Tan W, Hu Y. Association of radiologic findings with mortality of patients infected with 2019 novel coronavirus in Wuhan, China. *PLoS One*. 2020;15:1–10.
  64. Zhang G, Hu C, Luo L, Fang F, Chen Y, Li J, et al. Clinical features and short-term outcomes of 221 patients with COVID-19 in Wuhan, China. *J Clin Virol* [Internet]. 2020/04/21. 2020;127:104364. Available from: <https://www.ncbi.nlm.nih.gov/pubmed/32311650>
  65. Zhang J, Liu P, Wang M, Wang J, Chen J, Yuan W, et al. The clinical data from 19 critically ill patients with coronavirus disease 2019: a single-centered, retrospective, observational study. *Z Gesundh Wiss* [Internet]. 2020/04/23. 2020;1–4. Available from:  
<https://www.ncbi.nlm.nih.gov/pubmed/32318325>
  66. Zhang J, Wang X, Jia X, Li J, Hu K, Chen G, et al. Risk factors for disease severity, unimprovement, and mortality of COVID-19 patients in Wuhan, China. *Clin Microbiol Infect* [Internet]. 2020/04/19. 2020; Available from:  
<https://www.ncbi.nlm.nih.gov/pubmed/32304745>
  67. Zhang J, Dong X, Cao Y, Yuan Y, Yang Y, Yan Y, et al. Clinical characteristics of 140 patients infected with SARS-CoV-2 in Wuhan, China. *Allergy* [Internet]. 2020 Feb 27;00:all.14238. Available from: <https://onlinelibrary.wiley.com/doi/abs/10.1111/all.14238>
  68. Zhang Y, Qin L, Zhao Y, Zhang P, Xu B, Li K, et al. Interferon-induced transmembrane protein-3 genetic variant rs12252-C is associated with disease severity in COVID-19. *J Infect Dis* [Internet]. 2020/04/30. 2020; Available from:  
<https://www.ncbi.nlm.nih.gov/pubmed/32348495>
  69. Zhao XY, Xu XX, Yin HS, Hu QM, Xiong T, Tang YY, et al. Clinical characteristics of patients with 2019 coronavirus disease in a non-Wuhan area of Hubei Province, China: a retrospective study. *BMC Infect Dis* [Internet]. 2020/04/30. 2020;20(1):311. Available from:  
<https://www.ncbi.nlm.nih.gov/pubmed/32345226>
  70. Zheng KI, Gao F, Wang XB, Sun QF, Pan KH, Wang TY, et al. Obesity as a risk factor for greater severity of COVID-19 in patients with metabolic associated fatty liver disease. *Metabolism* [Internet]. 2020/04/23. 2020;154244. Available from:  
<https://www.ncbi.nlm.nih.gov/pubmed/32320741>
  71. Zheng S, Fan J, Yu F, Feng B, Lou B, Zou Q, et al. Viral load dynamics and disease severity in patients infected with SARS-CoV-2 in Zhejiang province, China, January-March 2020:

- retrospective cohort study. *BMJ* [Internet]. 2020/04/23. 2020;369:m1443. Available from: <https://www.ncbi.nlm.nih.gov/pubmed/32317267>
72. Zheng F, Tang W, Li H, Huang YX, Xie YL, Zhou ZG. Clinical characteristics of 161 cases of corona virus disease 2019 (COVID-19) in Changsha. *Eur Rev Med Pharmacol Sci* [Internet]. 2020/04/10. 2020;24(6):3404–10. Available from: <https://www.ncbi.nlm.nih.gov/pubmed/32271459>
  73. Zhou F, Yu T, Du R, Fan G, Liu Y, Liu Z, et al. Clinical course and risk factors for mortality of adult inpatients with COVID-19 in Wuhan, China: a retrospective cohort study. *Lancet* [Internet]. 2020; Available from: [https://www.thelancet.com/pdfs/journals/lancet/PIIS0140-6736\(20\)30566-3.pdf](https://www.thelancet.com/pdfs/journals/lancet/PIIS0140-6736(20)30566-3.pdf)
  74. Zhu Z, Cai T, Fan L, Lou K, Hua X, Huang Z, et al. Clinical value of immune-inflammatory parameters to assess the severity of coronavirus disease 2019. *Int J Infect Dis* [Internet]. 2020/04/26. 2020; Available from: <https://www.ncbi.nlm.nih.gov/pubmed/32334118>
  75. Zou Y, Guo H, Zhang Y, Zhang Z, Liu Y, Wang J, et al. Analysis of coagulation parameters in patients with COVID-19 in Shanghai, China. *Biosci Trends* [Internet]. 2020/05/01. 2020; Available from: <https://www.ncbi.nlm.nih.gov/pubmed/32350161>
  76. Couper K, Taylor-Phillips S, Grove A, Freeman K, Osokogu O, Court R, et al. COVID-19 in cardiac arrest and infection risk to rescuers: a systematic review. *Resuscitation* [Internet]. 2020/04/24. 2020; Available from: <https://www.ncbi.nlm.nih.gov/pubmed/32325096>
  77. Hu Y, Sun J, Dai Z, Deng H, Li X, Huang Q, et al. Prevalence and severity of corona virus disease 2019 (COVID-19): A systematic review and meta-analysis. *J Clin Virol* [Internet]. 2020/04/22. 2020;127:104371. Available from: <https://www.ncbi.nlm.nih.gov/pubmed/32315817>
  78. Nasiri M, Haddadi S, Tahvildari A, al. et. COVID-19 clinical characteristics, and sex-specific risk of mortality: Systematic Review and Meta-analysis [Internet]. *medRxiv*, editor. 2020. Available from: <https://www.medrxiv.org/content/10.1101/2020.03.24.20042903v1.full.pdf>
  79. Xu L, Mao Y, Chen G. Risk factors for severe corona virus disease 2019 (COVID-19) patients : a systematic review and meta analysis [Internet]. *medRxiv*, editor. 2020. Available from: <https://www.medrxiv.org/content/10.1101/2020.03.30.20047415v1.full.pdf>
  80. Zhao Q, Meng M, Kumar R, Wu Y, Huang J, Lian N, et al. The impact of COPD and smoking history on the severity of Covid-19: A systemic review and meta-analysis. *J Med Virol* [Internet]. 2020/04/16. 2020; Available from: <https://www.ncbi.nlm.nih.gov/pubmed/32293753>
  81. Zheng Z, Peng F, Xu B, Zhao J, Liu H, Peng J, et al. Risk factors of critical & mortal COVID-19 cases: A systematic literature review and meta-analysis. *J Infect* [Internet]. 2020; Available from: <https://www.ncbi.nlm.nih.gov/pmc/articles/PMC7177098/>
  82. Zuin M, Rigatelli G, Zuliani G, Rigatelli A, Mazza A, Roncon L. Arterial hypertension and risk of death in patients with COVID-19 infection: systematic review and meta-analysis. *J Infect* [Internet]. 2020/04/14. 2020; Available from: <https://www.ncbi.nlm.nih.gov/pubmed/32283158>
  83. Li B, Yang J, Zhao F, Zhi L, Wang X, Liu L, et al. Prevalence and impact of cardiovascular metabolic diseases on COVID-19 in China. *Clin Res Cardiol* [Internet]. 2020/03/13. 2020; Available from: <https://www.ncbi.nlm.nih.gov/pubmed/32161990>
  84. Matsushita K, Ding N, Kou M, Hu X, Chen M, Gao Y, et al. The relationship of COVID-19 severity with cardiovascular disease and its traditional risk factors: A systematic review and meta-analysis [Internet]. *medRxiv*, editor. 2020. Available from: <https://www.medrxiv.org/content/10.1101/2020.04.05.20054155v1>
  85. Aggarwal G, Lippi G, Michael Henry B. Cerebrovascular disease is associated with an increased disease severity in patients with Coronavirus Disease 2019 (COVID-19): A pooled analysis of published literature. *Int J Stroke* [Internet]. 2020/04/21. 2020;1747493020921664. Available from: <https://www.ncbi.nlm.nih.gov/pubmed/32310015>
  86. Li JW, Han TW, Woodward M, Anderson CS, Zhou H, Chen YD, et al. The impact of 2019 novel coronavirus on heart injury: A systemic review and Meta-analysis. *Prog Cardiovasc Dis*

- [Internet]. 2020/04/20. 2020; Available from:  
<https://www.ncbi.nlm.nih.gov/pubmed/32305557>
87. Santoso A, Pranata R, Wibowo A, Al-Farabi MJ, Huang I, Antariksa B. Cardiac injury is associated with mortality and critically ill pneumonia in COVID-19: A meta-analysis. *Am J Emerg Med* [Internet]. 2020/04/26. 2020; Available from:  
<https://www.ncbi.nlm.nih.gov/pubmed/32331955>
88. Huang I, Lim M, Pranata R. Diabetes mellitus is associated with increased mortality and severity of disease in COVID-19 pneumonia - A systematic review, meta-analysis, and meta-regression. *Diabetes Metab Syndr* [Internet]. 2020;14(4):395–403. Available from:  
<https://www.ncbi.nlm.nih.gov/pubmed/32334395>
